# Supplementary material
Source: publisher site journal article supplement (https://www.spandidos-publications.com/3198/downloadSupplementary)
Supplement: Supplementary file 1 [file downloadSupplementary]

## Sheet: GO term-downregulation
Table SVI. Enrichment of target genes of downregulated microRNAs based on GO terms.
Pathway ID	Pathway description	Observed gene count	False discovery rate	Matching proteins in network (IDs)	Matching proteins in network (labels)
GO.0009725	response to hormone	23	2.69e-12	ENSRNOP00000002837,ENSRNOP00000003077,ENSRNOP00000004232,ENSRNOP00000005311,ENSRNOP00000005995,ENSRNOP00000006188,ENSRNOP00000008722,ENSRNOP00000009233,ENSRNOP00000009402,ENSRNOP00000012588,ENSRNOP00000014785,ENSRNOP00000019192,ENSRNOP00000020528,ENSRNOP00000022679,ENSRNOP00000023256,ENSRNOP00000024084,ENSRNOP00000024430,ENSRNOP00000026637,ENSRNOP00000026760,ENSRNOP00000028793,ENSRNOP00000042230,…	Acta1,Bdnf,Calm1,Cav2,Col1a1,Ctgf,Dhcr24,Hif1a,Hmox1,Igf1,Insig1,Itgb1,Kras,Mmp2,Myc,Parp1,Pdgfra,Rest,Slc2a4,Stat3,Txnip,Vegfa,Vim
GO.0010033	response to organic substance	28	1.33e-11	ENSRNOP00000002837,ENSRNOP00000003077,ENSRNOP00000004232,ENSRNOP00000004956,ENSRNOP00000005995,ENSRNOP00000006188,ENSRNOP00000008722,ENSRNOP00000008972,ENSRNOP00000009233,ENSRNOP00000009402,ENSRNOP00000012588,ENSRNOP00000014785,ENSRNOP00000016942,ENSRNOP00000018877,ENSRNOP00000019267,ENSRNOP00000022679,ENSRNOP00000023256,ENSRNOP00000024084,ENSRNOP00000024430,ENSRNOP00000025064,ENSRNOP00000026637,…	Acta1,Bdnf,Calm1,Calu,Cav2,Col3a1,Dhcr24,Hif1a,Hspa5,Igf1,Igf1r,Il6st,Insig1,Itgb1,Kras,Mmp2,Myc,Parp1,Pdgfra,Rest,Runx2,Scarb1,Slc2a4,Stat3,Syk,Txnip,Vegfa,Vim
GO.0014070	response to organic cyclic compound	22	1.33e-11	ENSRNOP00000002837,ENSRNOP00000003077,ENSRNOP00000004232,ENSRNOP00000005311,ENSRNOP00000005995,ENSRNOP00000006188,ENSRNOP00000008972,ENSRNOP00000009233,ENSRNOP00000012588,ENSRNOP00000014785,ENSRNOP00000019267,ENSRNOP00000020528,ENSRNOP00000022679,ENSRNOP00000024084,ENSRNOP00000024430,ENSRNOP00000026212,ENSRNOP00000026637,ENSRNOP00000026760,ENSRNOP00000028793,ENSRNOP00000042230,ENSRNOP00000063822,…	Acta1,Bdnf,Calm1,Calu,Col1a1,Ctgf,Hif1a,Igf1,Igf1r,Insig1,Itgb1,Kras,Mmp2,Myc,Notch1,Parp1,Pdgfra,Rest,Stat3,Txnip,Vegfa,Vim
GO.0033993	response to lipid	21	1.33e-11	ENSRNOP00000002837,ENSRNOP00000003077,ENSRNOP00000005311,ENSRNOP00000005995,ENSRNOP00000006188,ENSRNOP00000009233,ENSRNOP00000012588,ENSRNOP00000014785,ENSRNOP00000019192,ENSRNOP00000020528,ENSRNOP00000022679,ENSRNOP00000024084,ENSRNOP00000024430,ENSRNOP00000026212,ENSRNOP00000026637,ENSRNOP00000026760,ENSRNOP00000028793,ENSRNOP00000042230,ENSRNOP00000060874,ENSRNOP00000063822,ENSRNOP00000064356	Acta1,Bdnf,Calm1,Col1a1,Ctgf,Hif1a,Hmox1,Igf1,Insig1,Itgb1,Kras,Mmp2,Myc,Notch1,Pdgfra,Rest,Scarb1,Stat3,Txnip,Vegfa,Vim
GO.0009628	response to abiotic stimulus	21	1.35e-11	ENSRNOP00000002837,ENSRNOP00000003077,ENSRNOP00000005311,ENSRNOP00000005995,ENSRNOP00000006188,ENSRNOP00000012137,ENSRNOP00000012588,ENSRNOP00000014785,ENSRNOP00000020528,ENSRNOP00000022679,ENSRNOP00000023628,ENSRNOP00000024084,ENSRNOP00000024430,ENSRNOP00000026212,ENSRNOP00000026637,ENSRNOP00000027773,ENSRNOP00000028793,ENSRNOP00000040699,ENSRNOP00000042230,ENSRNOP00000064356,ENSRNOP00000065381	Acta1,Actn4,Bdnf,Col1a1,Ctgf,Dcx,Hif1a,Hspa4,Igf1,Itgb1,Kras,Mmp2,Myc,Notch1,Pdgfra,Pparg,Rest,Stx1a,Txnip,Vegfa,Vim
GO.0042221	response to chemical	30	1.46e-11	ENSRNOP00000002837,ENSRNOP00000003077,ENSRNOP00000004232,ENSRNOP00000004956,ENSRNOP00000005995,ENSRNOP00000006188,ENSRNOP00000008722,ENSRNOP00000008972,ENSRNOP00000009233,ENSRNOP00000009402,ENSRNOP00000011196,ENSRNOP00000012588,ENSRNOP00000014785,ENSRNOP00000016942,ENSRNOP00000018877,ENSRNOP00000019192,ENSRNOP00000019267,ENSRNOP00000021819,ENSRNOP00000022679,ENSRNOP00000023256,ENSRNOP00000024084,…	Acta1,Apod,Calm1,Calu,Cav2,Col3a1,Dhcr24,Hif1a,Hmox1,Igf1,Igf1r,Il6st,Insig1,Itgb1,Kras,Mmp2,Myc,Olr1,Parp1,Pdgfra,Rest,Runx2,Scarb1,Scn2b,Slc2a4,Stat3,Syk,Txnip,Vegfa,Vim
GO.0048545	response to steroid hormone	18	1.5e-11	ENSRNOP00000002837,ENSRNOP00000003077,ENSRNOP00000005311,ENSRNOP00000005995,ENSRNOP00000006188,ENSRNOP00000009233,ENSRNOP00000012588,ENSRNOP00000019192,ENSRNOP00000020528,ENSRNOP00000022679,ENSRNOP00000024084,ENSRNOP00000024430,ENSRNOP00000026212,ENSRNOP00000026637,ENSRNOP00000026760,ENSRNOP00000028793,ENSRNOP00000042230,ENSRNOP00000063822	Acta1,Calm1,Col1a1,Ctgf,Hif1a,Hmox1,Igf1,Insig1,Kras,Mmp2,Myc,Notch1,Pdgfra,Rest,Stat3,Txnip,Vegfa,Vim
GO.1901700	response to oxygen-containing compound	23	5.36e-11	ENSRNOP00000003077,ENSRNOP00000004232,ENSRNOP00000004956,ENSRNOP00000005995,ENSRNOP00000006188,ENSRNOP00000008722,ENSRNOP00000009233,ENSRNOP00000011196,ENSRNOP00000014785,ENSRNOP00000019192,ENSRNOP00000019267,ENSRNOP00000020528,ENSRNOP00000022679,ENSRNOP00000023256,ENSRNOP00000024430,ENSRNOP00000026637,ENSRNOP00000026760,ENSRNOP00000028793,ENSRNOP00000042230,ENSRNOP00000060874,ENSRNOP00000063822,…	Apod,Bdnf,Calm1,Cav2,Col3a1,Ctgf,Hif1a,Hmox1,Igf1,Igf1r,Insig1,Itgb1,Mmp2,Myc,Olr1,Parp1,Pdgfra,Scarb1,Slc2a4,Stat3,Txnip,Vegfa,Vim
GO.0032879	regulation of localization	24	1.83e-10	ENSRNOP00000002837,ENSRNOP00000003077,ENSRNOP00000004232,ENSRNOP00000004956,ENSRNOP00000005311,ENSRNOP00000005995,ENSRNOP00000006188,ENSRNOP00000006238,ENSRNOP00000008722,ENSRNOP00000014785,ENSRNOP00000016942,ENSRNOP00000017000,ENSRNOP00000018877,ENSRNOP00000019192,ENSRNOP00000019267,ENSRNOP00000022679,ENSRNOP00000024430,ENSRNOP00000025064,ENSRNOP00000026637,ENSRNOP00000026760,ENSRNOP00000027773,…	Actn4,Apod,Calm1,Cav2,Col1a1,Col3a1,Hmox1,Hspa5,Igf1,Igf1r,Il6st,Itgb1,Kcnj16,Mmp2,Myc,Parp1,Pdgfra,Rest,S100a1,Scarb1,Stat3,Syk,Vegfa,Vim
GO.0071310	cellular response to organic substance	21	1.83e-10	ENSRNOP00000002837,ENSRNOP00000003077,ENSRNOP00000004232,ENSRNOP00000004956,ENSRNOP00000006188,ENSRNOP00000008722,ENSRNOP00000009233,ENSRNOP00000012588,ENSRNOP00000014785,ENSRNOP00000018877,ENSRNOP00000020528,ENSRNOP00000022679,ENSRNOP00000023256,ENSRNOP00000024430,ENSRNOP00000025064,ENSRNOP00000026637,ENSRNOP00000026760,ENSRNOP00000042230,ENSRNOP00000057733,ENSRNOP00000060874,ENSRNOP00000064356	Bdnf,Cav2,Col3a1,Ctgf,Hif1a,Hspa5,Il6st,Insig1,Itgb1,Kras,Mmp2,Myc,Parp1,Pdgfra,Rest,Runx2,Scarb1,Slc2a4,Stat3,Vegfa,Vim
GO.0019222	regulation of metabolic process	31	1.87e-10	ENSRNOP00000002837,ENSRNOP00000003077,ENSRNOP00000004232,ENSRNOP00000005311,ENSRNOP00000005995,ENSRNOP00000006188,ENSRNOP00000008722,ENSRNOP00000008930,ENSRNOP00000008972,ENSRNOP00000009179,ENSRNOP00000009402,ENSRNOP00000012137,ENSRNOP00000012588,ENSRNOP00000014785,ENSRNOP00000016942,ENSRNOP00000017000,ENSRNOP00000019192,ENSRNOP00000019267,ENSRNOP00000023628,ENSRNOP00000024084,ENSRNOP00000025064,…	Acta1,Actn4,Apod,Bdnf,Calm1,Calu,Cav2,Col1a1,Dhcr24,Grpel1,Hif1a,Hmox1,Hspa4,Hspa5,Hspa8,Igf1,Igf1r,Itgb1,Kras,Myc,Parp1,Pdgfra,Pparg,Ppia,Rest,Runx2,S100a1,Scarb1,Syk,Txnip,Vegfa
GO.0009888	tissue development	18	3.85e-10	ENSRNOP00000003077,ENSRNOP00000004956,ENSRNOP00000005311,ENSRNOP00000006188,ENSRNOP00000008722,ENSRNOP00000009402,ENSRNOP00000012137,ENSRNOP00000012588,ENSRNOP00000019267,ENSRNOP00000020528,ENSRNOP00000022679,ENSRNOP00000024084,ENSRNOP00000024430,ENSRNOP00000028793,ENSRNOP00000057733,ENSRNOP00000063604,ENSRNOP00000064356,ENSRNOP00000064368	Acta1,Apod,Bdnf,Cav2,Col1a1,Col3a1,Ctgf,Dhcr24,Igf1r,Kras,Mmp2,Myc,Pdgfra,Pparg,Runx2,Slc17a7,Txnip,Vim
GO.0043627	response to estrogen	13	5.71e-10	ENSRNOP00000003077,ENSRNOP00000005311,ENSRNOP00000006188,ENSRNOP00000009233,ENSRNOP00000012137,ENSRNOP00000019192,ENSRNOP00000020528,ENSRNOP00000022679,ENSRNOP00000024430,ENSRNOP00000026637,ENSRNOP00000026760,ENSRNOP00000028793,ENSRNOP00000042230	Col1a1,Ctgf,Hif1a,Hmox1,Insig1,Mmp2,Myc,Pdgfra,Pparg,Stat3,Txnip,Vegfa,Vim
GO.0070887	cellular response to chemical stimulus	22	6.59e-10	ENSRNOP00000002837,ENSRNOP00000003077,ENSRNOP00000004232,ENSRNOP00000004956,ENSRNOP00000006188,ENSRNOP00000008722,ENSRNOP00000009233,ENSRNOP00000012588,ENSRNOP00000014785,ENSRNOP00000016942,ENSRNOP00000018877,ENSRNOP00000019192,ENSRNOP00000020528,ENSRNOP00000022679,ENSRNOP00000023256,ENSRNOP00000024430,ENSRNOP00000026637,ENSRNOP00000026760,ENSRNOP00000042230,ENSRNOP00000057733,ENSRNOP00000060874,…	Bdnf,Cav2,Col3a1,Ctgf,Hif1a,Hmox1,Il6st,Insig1,Itgb1,Kras,Mmp2,Myc,Parp1,Pdgfra,Rest,Runx2,Scarb1,Slc2a4,Stat3,Syk,Vegfa,Vim
GO.0007166	cell surface receptor signaling pathway	18	7.27e-10	ENSRNOP00000003077,ENSRNOP00000004232,ENSRNOP00000004956,ENSRNOP00000005995,ENSRNOP00000006188,ENSRNOP00000006426,ENSRNOP00000008722,ENSRNOP00000012588,ENSRNOP00000014785,ENSRNOP00000016942,ENSRNOP00000018877,ENSRNOP00000019267,ENSRNOP00000020528,ENSRNOP00000026637,ENSRNOP00000026760,ENSRNOP00000028793,ENSRNOP00000060874,ENSRNOP00000064356	Bdnf,Cav2,Col3a1,Ctgf,Igf1,Igf1r,Il6st,Itgb1,Kras,Myc,Parp1,Pdgfra,Scarb1,Stat3,Syk,Txnip,Vegfa,Wif1
GO.0080090	regulation of primary metabolic process	28	7.55e-10	ENSRNOP00000002837,ENSRNOP00000003077,ENSRNOP00000004232,ENSRNOP00000005311,ENSRNOP00000005995,ENSRNOP00000006188,ENSRNOP00000008722,ENSRNOP00000009179,ENSRNOP00000009402,ENSRNOP00000012137,ENSRNOP00000012588,ENSRNOP00000014785,ENSRNOP00000016942,ENSRNOP00000017000,ENSRNOP00000019192,ENSRNOP00000019267,ENSRNOP00000023628,ENSRNOP00000025064,ENSRNOP00000026637,ENSRNOP00000027773,ENSRNOP00000028793,…	Actn4,Apod,Bdnf,Calm1,Cav2,Col1a1,Dhcr24,Hif1a,Hmox1,Hspa4,Hspa5,Hspa8,Igf1,Igf1r,Itgb1,Kras,Myc,Parp1,Pdgfra,Pparg,Ppia,Rest,Runx2,S100a1,Scarb1,Syk,Txnip,Vegfa
GO.0009719	response to endogenous stimulus	22	9.03e-10	ENSRNOP00000002837,ENSRNOP00000003077,ENSRNOP00000004232,ENSRNOP00000004956,ENSRNOP00000005995,ENSRNOP00000006188,ENSRNOP00000008722,ENSRNOP00000009233,ENSRNOP00000009402,ENSRNOP00000012588,ENSRNOP00000014785,ENSRNOP00000022679,ENSRNOP00000023256,ENSRNOP00000024084,ENSRNOP00000024430,ENSRNOP00000026637,ENSRNOP00000026760,ENSRNOP00000028793,ENSRNOP00000042230,ENSRNOP00000057733,ENSRNOP00000063822,…	Acta1,Bdnf,Calm1,Cav2,Col3a1,Dhcr24,Hif1a,Igf1,Insig1,Itgb1,Kras,Mmp2,Myc,Parp1,Pdgfra,Rest,Runx2,Slc2a4,Stat3,Txnip,Vegfa,Vim
GO.0031323	regulation of cellular metabolic process	28	1.44e-09	ENSRNOP00000002837,ENSRNOP00000003077,ENSRNOP00000004232,ENSRNOP00000005311,ENSRNOP00000005995,ENSRNOP00000006188,ENSRNOP00000008722,ENSRNOP00000009179,ENSRNOP00000009402,ENSRNOP00000012137,ENSRNOP00000012588,ENSRNOP00000014785,ENSRNOP00000016942,ENSRNOP00000017000,ENSRNOP00000019192,ENSRNOP00000019267,ENSRNOP00000023628,ENSRNOP00000025064,ENSRNOP00000026637,ENSRNOP00000027773,ENSRNOP00000028793,…	Actn4,Apod,Bdnf,Calm1,Cav2,Col1a1,Dhcr24,Hif1a,Hmox1,Hspa4,Hspa5,Hspa8,Igf1,Igf1r,Itgb1,Kras,Myc,Parp1,Pdgfra,Pparg,Ppia,Rest,Runx2,S100a1,Scarb1,Syk,Txnip,Vegfa
GO.0051270	regulation of cellular component movement	14	1.93e-09	ENSRNOP00000003077,ENSRNOP00000004956,ENSRNOP00000005311,ENSRNOP00000014785,ENSRNOP00000018877,ENSRNOP00000019267,ENSRNOP00000021819,ENSRNOP00000022679,ENSRNOP00000024430,ENSRNOP00000025064,ENSRNOP00000026637,ENSRNOP00000026760,ENSRNOP00000027773,ENSRNOP00000064368	Actn4,Apod,Col1a1,Col3a1,Hspa5,Igf1r,Il6st,Itgb1,Mmp2,Pdgfra,Scn2b,Stat3,Vegfa,Vim
GO.0071495	cellular response to endogenous stimulus	17	1.93e-09	ENSRNOP00000002837,ENSRNOP00000003077,ENSRNOP00000004232,ENSRNOP00000004956,ENSRNOP00000006188,ENSRNOP00000008722,ENSRNOP00000009233,ENSRNOP00000020528,ENSRNOP00000022679,ENSRNOP00000023256,ENSRNOP00000024430,ENSRNOP00000026212,ENSRNOP00000026637,ENSRNOP00000026760,ENSRNOP00000042230,ENSRNOP00000057733,ENSRNOP00000064356	Bdnf,Cav2,Col3a1,Ctgf,Hif1a,Insig1,Mmp2,Myc,Notch1,Parp1,Pdgfra,Rest,Runx2,Slc2a4,Stat3,Vegfa,Vim
GO.0032355	response to estradiol	11	4.09e-09	ENSRNOP00000003077,ENSRNOP00000005311,ENSRNOP00000006188,ENSRNOP00000009233,ENSRNOP00000020528,ENSRNOP00000022679,ENSRNOP00000024430,ENSRNOP00000026637,ENSRNOP00000026760,ENSRNOP00000028793,ENSRNOP00000042230	Col1a1,Ctgf,Hif1a,Insig1,Mmp2,Myc,Pdgfra,Stat3,Txnip,Vegfa,Vim
GO.0065009	regulation of molecular function	21	8.78e-09	ENSRNOP00000002837,ENSRNOP00000003077,ENSRNOP00000004232,ENSRNOP00000005995,ENSRNOP00000006188,ENSRNOP00000008930,ENSRNOP00000008972,ENSRNOP00000009179,ENSRNOP00000009402,ENSRNOP00000012588,ENSRNOP00000017000,ENSRNOP00000019192,ENSRNOP00000020528,ENSRNOP00000021819,ENSRNOP00000023628,ENSRNOP00000025064,ENSRNOP00000026212,ENSRNOP00000028793,ENSRNOP00000060874,ENSRNOP00000063822,ENSRNOP00000064356	Bdnf,Calm1,Calu,Ctgf,Dhcr24,Grpel1,Hmox1,Hspa4,Hspa5,Igf1,Kras,Myc,Notch1,Parp1,Pdgfra,Ppia,Rest,S100a1,Scarb1,Scn2b,Txnip
GO.0007167	enzyme linked receptor protein signaling pathway	12	1.14e-08	ENSRNOP00000003077,ENSRNOP00000004232,ENSRNOP00000004956,ENSRNOP00000005995,ENSRNOP00000008722,ENSRNOP00000016942,ENSRNOP00000019267,ENSRNOP00000020528,ENSRNOP00000026637,ENSRNOP00000026760,ENSRNOP00000028793,ENSRNOP00000064356	Bdnf,Cav2,Col3a1,Ctgf,Igf1,Igf1r,Parp1,Pdgfra,Stat3,Syk,Txnip,Vegfa
GO.0050793	regulation of developmental process	19	1.3e-08	ENSRNOP00000002837,ENSRNOP00000003077,ENSRNOP00000004956,ENSRNOP00000005311,ENSRNOP00000005995,ENSRNOP00000006188,ENSRNOP00000006426,ENSRNOP00000007788,ENSRNOP00000012137,ENSRNOP00000012588,ENSRNOP00000014785,ENSRNOP00000016942,ENSRNOP00000019192,ENSRNOP00000020528,ENSRNOP00000023628,ENSRNOP00000024430,ENSRNOP00000026637,ENSRNOP00000026760,ENSRNOP00000057733	Cntn4,Col1a1,Col3a1,Ctgf,Hmox1,Hspa4,Igf1,Itgb1,Kras,Myc,Pdgfra,Pparg,Rest,Runx2,Stat3,Syk,Vegfa,Vim,Wif1
GO.0060255	regulation of macromolecule metabolic process	26	1.31e-08	ENSRNOP00000002837,ENSRNOP00000003077,ENSRNOP00000004232,ENSRNOP00000005311,ENSRNOP00000005995,ENSRNOP00000006188,ENSRNOP00000008722,ENSRNOP00000009179,ENSRNOP00000009402,ENSRNOP00000012137,ENSRNOP00000012588,ENSRNOP00000014785,ENSRNOP00000016942,ENSRNOP00000017000,ENSRNOP00000019192,ENSRNOP00000023628,ENSRNOP00000024084,ENSRNOP00000025064,ENSRNOP00000026637,ENSRNOP00000027773,ENSRNOP00000028793,…	Acta1,Actn4,Apod,Bdnf,Cav2,Col1a1,Dhcr24,Hif1a,Hmox1,Hspa4,Hspa5,Hspa8,Igf1,Itgb1,Kras,Myc,Parp1,Pdgfra,Pparg,Ppia,Rest,Runx2,S100a1,Syk,Txnip,Vegfa
GO.0097305	response to alcohol	14	1.48e-08	ENSRNOP00000003077,ENSRNOP00000005311,ENSRNOP00000006188,ENSRNOP00000009233,ENSRNOP00000014785,ENSRNOP00000020528,ENSRNOP00000022679,ENSRNOP00000023256,ENSRNOP00000024430,ENSRNOP00000026637,ENSRNOP00000026760,ENSRNOP00000028793,ENSRNOP00000042230,ENSRNOP00000063822	Calm1,Col1a1,Ctgf,Hif1a,Insig1,Itgb1,Mmp2,Myc,Pdgfra,Slc2a4,Stat3,Txnip,Vegfa,Vim
GO.0048584	positive regulation of response to stimulus	17	1.73e-08	ENSRNOP00000003077,ENSRNOP00000004232,ENSRNOP00000004956,ENSRNOP00000005311,ENSRNOP00000005995,ENSRNOP00000006188,ENSRNOP00000008722,ENSRNOP00000014785,ENSRNOP00000016942,ENSRNOP00000019192,ENSRNOP00000019267,ENSRNOP00000020528,ENSRNOP00000026212,ENSRNOP00000026637,ENSRNOP00000026760,ENSRNOP00000060874,ENSRNOP00000064356	Bdnf,Cav2,Col1a1,Col3a1,Ctgf,Hmox1,Igf1,Igf1r,Itgb1,Myc,Notch1,Parp1,Pdgfra,Scarb1,Stat3,Syk,Vegfa
GO.0051239	regulation of multicellular organismal process	20	2.78e-08	ENSRNOP00000002837,ENSRNOP00000003077,ENSRNOP00000004956,ENSRNOP00000005311,ENSRNOP00000005995,ENSRNOP00000006188,ENSRNOP00000007788,ENSRNOP00000014785,ENSRNOP00000016942,ENSRNOP00000017000,ENSRNOP00000019192,ENSRNOP00000021819,ENSRNOP00000022679,ENSRNOP00000023628,ENSRNOP00000024430,ENSRNOP00000026637,ENSRNOP00000026760,ENSRNOP00000042230,ENSRNOP00000057733,ENSRNOP00000064368	Apod,Cntn4,Col1a1,Col3a1,Hif1a,Hmox1,Hspa4,Igf1,Itgb1,Mmp2,Myc,Pdgfra,Rest,Runx2,S100a1,Scn2b,Stat3,Syk,Vegfa,Vim
GO.0030154	cell differentiation	22	2.89e-08	ENSRNOP00000002837,ENSRNOP00000003077,ENSRNOP00000004956,ENSRNOP00000005311,ENSRNOP00000007788,ENSRNOP00000008722,ENSRNOP00000008972,ENSRNOP00000012588,ENSRNOP00000014785,ENSRNOP00000016942,ENSRNOP00000019267,ENSRNOP00000019403,ENSRNOP00000020528,ENSRNOP00000022679,ENSRNOP00000023256,ENSRNOP00000024084,ENSRNOP00000024430,ENSRNOP00000026637,ENSRNOP00000028793,ENSRNOP00000057733,ENSRNOP00000064368,…	Acta1,Apod,Calu,Cav2,Cntn4,Col1a1,Col3a1,Ctgf,Dcx,Igf1r,Itgb1,Kras,Mmp2,Pdgfra,Rest,Runx2,Slc2a4,Sp1,Syk,Txnip,Vegfa,Vim
GO.0010035	response to inorganic substance	14	2.93e-08	ENSRNOP00000003077,ENSRNOP00000004232,ENSRNOP00000005311,ENSRNOP00000006188,ENSRNOP00000011196,ENSRNOP00000012137,ENSRNOP00000019192,ENSRNOP00000022679,ENSRNOP00000024084,ENSRNOP00000024430,ENSRNOP00000025064,ENSRNOP00000028793,ENSRNOP00000042230,ENSRNOP00000064356	Acta1,Bdnf,Col1a1,Hif1a,Hmox1,Hspa5,Mmp2,Myc,Olr1,Parp1,Pdgfra,Pparg,Txnip,Vim
GO.0042127	regulation of cell proliferation	16	3.05e-08	ENSRNOP00000002837,ENSRNOP00000003077,ENSRNOP00000005995,ENSRNOP00000006188,ENSRNOP00000008722,ENSRNOP00000009402,ENSRNOP00000012588,ENSRNOP00000014785,ENSRNOP00000016942,ENSRNOP00000020528,ENSRNOP00000024430,ENSRNOP00000026637,ENSRNOP00000028793,ENSRNOP00000042230,ENSRNOP00000064356,ENSRNOP00000064368	Apod,Bdnf,Cav2,Ctgf,Dhcr24,Hif1a,Igf1,Itgb1,Kras,Myc,Pdgfra,Rest,Syk,Txnip,Vegfa,Vim
GO.0048513	organ development	21	3.05e-08	ENSRNOP00000002837,ENSRNOP00000003077,ENSRNOP00000006188,ENSRNOP00000007788,ENSRNOP00000008722,ENSRNOP00000012588,ENSRNOP00000017000,ENSRNOP00000019267,ENSRNOP00000019403,ENSRNOP00000022679,ENSRNOP00000023628,ENSRNOP00000024084,ENSRNOP00000024430,ENSRNOP00000025064,ENSRNOP00000026637,ENSRNOP00000026760,ENSRNOP00000028793,ENSRNOP00000057733,ENSRNOP00000063604,ENSRNOP00000064356,ENSRNOP00000064368	Acta1,Apod,Bdnf,Cav2,Cntn4,Hspa4,Hspa5,Igf1r,Kras,Mmp2,Myc,Pdgfra,Rest,Runx2,S100a1,Slc17a7,Sp1,Stat3,Txnip,Vegfa,Vim
GO.0009612	response to mechanical stimulus	10	3.57e-08	ENSRNOP00000004956,ENSRNOP00000005311,ENSRNOP00000005995,ENSRNOP00000012137,ENSRNOP00000014785,ENSRNOP00000022679,ENSRNOP00000024084,ENSRNOP00000028793,ENSRNOP00000042230,ENSRNOP00000064356	Acta1,Bdnf,Col1a1,Col3a1,Hif1a,Igf1,Itgb1,Mmp2,Pparg,Txnip
GO.0045595	regulation of cell differentiation	16	4.6e-08	ENSRNOP00000002837,ENSRNOP00000003077,ENSRNOP00000004956,ENSRNOP00000005311,ENSRNOP00000005995,ENSRNOP00000006188,ENSRNOP00000006426,ENSRNOP00000007788,ENSRNOP00000012137,ENSRNOP00000012588,ENSRNOP00000014785,ENSRNOP00000016942,ENSRNOP00000020528,ENSRNOP00000024430,ENSRNOP00000026760,ENSRNOP00000057733	Cntn4,Col1a1,Col3a1,Ctgf,Igf1,Itgb1,Kras,Myc,Pdgfra,Pparg,Rest,Runx2,Stat3,Syk,Vim,Wif1
GO.0030334	regulation of cell migration	12	4.78e-08	ENSRNOP00000003077,ENSRNOP00000004956,ENSRNOP00000005311,ENSRNOP00000014785,ENSRNOP00000018877,ENSRNOP00000019267,ENSRNOP00000022679,ENSRNOP00000024430,ENSRNOP00000025064,ENSRNOP00000026637,ENSRNOP00000026760,ENSRNOP00000064368	Apod,Col1a1,Col3a1,Hspa5,Igf1r,Il6st,Itgb1,Mmp2,Pdgfra,Stat3,Vegfa,Vim
GO.0042981	regulation of apoptotic process	16	5.7e-08	ENSRNOP00000002837,ENSRNOP00000005995,ENSRNOP00000006188,ENSRNOP00000009402,ENSRNOP00000012588,ENSRNOP00000019267,ENSRNOP00000020528,ENSRNOP00000022679,ENSRNOP00000023628,ENSRNOP00000025064,ENSRNOP00000026212,ENSRNOP00000026760,ENSRNOP00000027773,ENSRNOP00000028793,ENSRNOP00000042230,ENSRNOP00000064356	Actn4,Bdnf,Ctgf,Dhcr24,Hif1a,Hspa4,Hspa5,Igf1,Igf1r,Kras,Mmp2,Myc,Notch1,Rest,Stat3,Txnip
GO.0048731	system development	24	6.21e-08	ENSRNOP00000002837,ENSRNOP00000003077,ENSRNOP00000006188,ENSRNOP00000007788,ENSRNOP00000008722,ENSRNOP00000008972,ENSRNOP00000012588,ENSRNOP00000014785,ENSRNOP00000016942,ENSRNOP00000017000,ENSRNOP00000019192,ENSRNOP00000019403,ENSRNOP00000021819,ENSRNOP00000022679,ENSRNOP00000023628,ENSRNOP00000024084,ENSRNOP00000024430,ENSRNOP00000025064,ENSRNOP00000026637,ENSRNOP00000028793,ENSRNOP00000057733,…	Acta1,Apod,Calu,Cav2,Cntn4,Dcx,Hmox1,Hspa4,Hspa5,Itgb1,Kras,Mmp2,Myc,Pdgfra,Rest,Runx2,S100a1,Scn2b,Slc17a7,Sp1,Syk,Txnip,Vegfa,Vim
GO.0043067	regulation of programmed cell death	16	6.38e-08	ENSRNOP00000002837,ENSRNOP00000005995,ENSRNOP00000006188,ENSRNOP00000009402,ENSRNOP00000012588,ENSRNOP00000019267,ENSRNOP00000020528,ENSRNOP00000022679,ENSRNOP00000023628,ENSRNOP00000025064,ENSRNOP00000026212,ENSRNOP00000026637,ENSRNOP00000026760,ENSRNOP00000027773,ENSRNOP00000028793,ENSRNOP00000042230	Actn4,Ctgf,Dhcr24,Hif1a,Hspa4,Hspa5,Igf1,Igf1r,Kras,Mmp2,Myc,Notch1,Rest,Stat3,Txnip,Vegfa
GO.0007169	transmembrane receptor protein tyrosine kinase signaling pathway	10	6.88e-08	ENSRNOP00000003077,ENSRNOP00000005995,ENSRNOP00000008722,ENSRNOP00000016942,ENSRNOP00000019267,ENSRNOP00000020528,ENSRNOP00000026637,ENSRNOP00000026760,ENSRNOP00000028793,ENSRNOP00000064356	Bdnf,Cav2,Ctgf,Igf1,Igf1r,Pdgfra,Stat3,Syk,Txnip,Vegfa
GO.0048518	positive regulation of biological process	26	6.88e-08	ENSRNOP00000002837,ENSRNOP00000003077,ENSRNOP00000004232,ENSRNOP00000004956,ENSRNOP00000005311,ENSRNOP00000005995,ENSRNOP00000006188,ENSRNOP00000006426,ENSRNOP00000008722,ENSRNOP00000012137,ENSRNOP00000014785,ENSRNOP00000016942,ENSRNOP00000017000,ENSRNOP00000018877,ENSRNOP00000019267,ENSRNOP00000022679,ENSRNOP00000023628,ENSRNOP00000024084,ENSRNOP00000024430,ENSRNOP00000026637,ENSRNOP00000027773,…	Acta1,Actn4,Calm1,Cav2,Col1a1,Col3a1,Hif1a,Hspa4,Igf1,Igf1r,Il6st,Itgb1,Mmp2,Myc,Parp1,Pdgfra,Pparg,Rest,Runx2,S100a1,Scarb1,Syk,Txnip,Vegfa,Vim,Wif1
GO.0048522	positive regulation of cellular process	24	1.33e-07	ENSRNOP00000002837,ENSRNOP00000003077,ENSRNOP00000004232,ENSRNOP00000004956,ENSRNOP00000005311,ENSRNOP00000005995,ENSRNOP00000006188,ENSRNOP00000006426,ENSRNOP00000008722,ENSRNOP00000012137,ENSRNOP00000014785,ENSRNOP00000016942,ENSRNOP00000017000,ENSRNOP00000018877,ENSRNOP00000019192,ENSRNOP00000019267,ENSRNOP00000022679,ENSRNOP00000024430,ENSRNOP00000026637,ENSRNOP00000027773,ENSRNOP00000028793,…	Actn4,Calm1,Cav2,Col1a1,Col3a1,Hif1a,Hmox1,Igf1,Igf1r,Il6st,Itgb1,Mmp2,Myc,Parp1,Pdgfra,Pparg,Rest,S100a1,Scarb1,Syk,Txnip,Vegfa,Vim,Wif1
GO.0007275	multicellular organismal development	25	1.34e-07	ENSRNOP00000002837,ENSRNOP00000003077,ENSRNOP00000006188,ENSRNOP00000006426,ENSRNOP00000007788,ENSRNOP00000008722,ENSRNOP00000008972,ENSRNOP00000012588,ENSRNOP00000014785,ENSRNOP00000016942,ENSRNOP00000017000,ENSRNOP00000019192,ENSRNOP00000019403,ENSRNOP00000021819,ENSRNOP00000022679,ENSRNOP00000023628,ENSRNOP00000024084,ENSRNOP00000024430,ENSRNOP00000025064,ENSRNOP00000026637,ENSRNOP00000028793,…	Acta1,Apod,Calu,Cav2,Cntn4,Dcx,Hmox1,Hspa4,Hspa5,Itgb1,Kras,Mmp2,Myc,Pdgfra,Rest,Runx2,S100a1,Scn2b,Slc17a7,Sp1,Syk,Txnip,Vegfa,Vim,Wif1
GO.0016043	cellular component organization	24	1.35e-07	ENSRNOP00000002837,ENSRNOP00000003077,ENSRNOP00000004232,ENSRNOP00000004956,ENSRNOP00000005311,ENSRNOP00000006188,ENSRNOP00000007788,ENSRNOP00000008722,ENSRNOP00000008972,ENSRNOP00000009402,ENSRNOP00000012588,ENSRNOP00000014785,ENSRNOP00000019192,ENSRNOP00000019267,ENSRNOP00000020528,ENSRNOP00000022679,ENSRNOP00000024084,ENSRNOP00000026760,ENSRNOP00000027773,ENSRNOP00000040699,ENSRNOP00000042230,…	Acta1,Actn4,Apod,Calu,Cav2,Cntn4,Col1a1,Col3a1,Ctgf,Dhcr24,Hif1a,Hmox1,Igf1r,Itgb1,Kras,Mmp2,Myc,Parp1,Pdgfra,Rest,Scarb1,Slc17a7,Stat3,Stx1a
GO.0009605	response to external stimulus	18	1.37e-07	ENSRNOP00000003077,ENSRNOP00000004956,ENSRNOP00000005311,ENSRNOP00000005995,ENSRNOP00000014785,ENSRNOP00000016942,ENSRNOP00000018877,ENSRNOP00000019192,ENSRNOP00000019267,ENSRNOP00000022679,ENSRNOP00000024084,ENSRNOP00000024430,ENSRNOP00000025064,ENSRNOP00000026212,ENSRNOP00000026637,ENSRNOP00000028793,ENSRNOP00000042230,ENSRNOP00000060874	Acta1,Col1a1,Col3a1,Hif1a,Hmox1,Hspa5,Igf1,Igf1r,Il6st,Itgb1,Mmp2,Notch1,Pdgfra,Scarb1,Syk,Txnip,Vegfa,Vim
GO.0009889	regulation of biosynthetic process	21	1.4e-07	ENSRNOP00000002837,ENSRNOP00000003077,ENSRNOP00000004232,ENSRNOP00000005311,ENSRNOP00000005995,ENSRNOP00000006188,ENSRNOP00000012137,ENSRNOP00000012588,ENSRNOP00000017000,ENSRNOP00000019192,ENSRNOP00000019267,ENSRNOP00000020528,ENSRNOP00000026637,ENSRNOP00000027773,ENSRNOP00000028793,ENSRNOP00000042230,ENSRNOP00000057733,ENSRNOP00000058593,ENSRNOP00000060874,ENSRNOP00000063822,ENSRNOP00000064356	Actn4,Bdnf,Calm1,Col1a1,Ctgf,Hif1a,Hmox1,Hspa8,Igf1,Igf1r,Kras,Myc,Parp1,Pdgfra,Pparg,Rest,Runx2,S100a1,Scarb1,Txnip,Vegfa
GO.0032501	multicellular organismal process	28	1.4e-07	ENSRNOP00000002837,ENSRNOP00000003077,ENSRNOP00000004232,ENSRNOP00000005995,ENSRNOP00000006188,ENSRNOP00000006426,ENSRNOP00000007788,ENSRNOP00000008722,ENSRNOP00000008972,ENSRNOP00000012588,ENSRNOP00000014785,ENSRNOP00000016942,ENSRNOP00000017000,ENSRNOP00000019192,ENSRNOP00000019403,ENSRNOP00000022679,ENSRNOP00000023628,ENSRNOP00000024084,ENSRNOP00000024430,ENSRNOP00000025064,ENSRNOP00000026637,…	Acta1,Apod,Calu,Capn8,Cav2,Cntn4,Dcx,Hif1a,Hmox1,Hspa4,Hspa5,Igf1,Itgb1,Kras,Mmp2,Myc,Parp1,Pdgfra,Rest,Runx2,S100a1,Scarb1,Sp1,Syk,Txnip,Vegfa,Vim,Wif1
GO.0070848	response to growth factor	11	1.47e-07	ENSRNOP00000003077,ENSRNOP00000004232,ENSRNOP00000004956,ENSRNOP00000005311,ENSRNOP00000014785,ENSRNOP00000020528,ENSRNOP00000024430,ENSRNOP00000026212,ENSRNOP00000026637,ENSRNOP00000057733,ENSRNOP00000064356	Bdnf,Col1a1,Col3a1,Ctgf,Itgb1,Notch1,Parp1,Pdgfra,Runx2,Vegfa,Vim
GO.0009967	positive regulation of signal transduction	14	1.7e-07	ENSRNOP00000003077,ENSRNOP00000004232,ENSRNOP00000004956,ENSRNOP00000005311,ENSRNOP00000005995,ENSRNOP00000008722,ENSRNOP00000014785,ENSRNOP00000019192,ENSRNOP00000019267,ENSRNOP00000020528,ENSRNOP00000026212,ENSRNOP00000026637,ENSRNOP00000026760,ENSRNOP00000064356	Bdnf,Cav2,Col1a1,Col3a1,Ctgf,Hmox1,Igf1,Igf1r,Itgb1,Notch1,Parp1,Pdgfra,Stat3,Vegfa
GO.0009887	organ morphogenesis	11	2.09e-07	ENSRNOP00000003077,ENSRNOP00000004956,ENSRNOP00000006188,ENSRNOP00000012588,ENSRNOP00000019267,ENSRNOP00000019403,ENSRNOP00000020528,ENSRNOP00000022679,ENSRNOP00000024084,ENSRNOP00000026212,ENSRNOP00000026760	Acta1,Col3a1,Ctgf,Igf1r,Kras,Mmp2,Myc,Notch1,Pdgfra,Sp1,Stat3
GO.0051272	positive regulation of cellular component movement	10	2.34e-07	ENSRNOP00000003077,ENSRNOP00000005311,ENSRNOP00000014785,ENSRNOP00000018877,ENSRNOP00000019267,ENSRNOP00000022679,ENSRNOP00000025064,ENSRNOP00000026212,ENSRNOP00000026637,ENSRNOP00000027773	Actn4,Col1a1,Hspa5,Igf1r,Il6st,Itgb1,Mmp2,Notch1,Pdgfra,Vegfa
GO.0009611	response to wounding	11	2.65e-07	ENSRNOP00000003077,ENSRNOP00000004956,ENSRNOP00000005311,ENSRNOP00000006188,ENSRNOP00000008972,ENSRNOP00000019192,ENSRNOP00000022679,ENSRNOP00000024430,ENSRNOP00000026212,ENSRNOP00000026637,ENSRNOP00000064368	Apod,Calu,Col1a1,Col3a1,Hmox1,Mmp2,Myc,Notch1,Pdgfra,Vegfa,Vim
GO.0044707	single-multicellular organism process	27	2.65e-07	ENSRNOP00000002837,ENSRNOP00000003077,ENSRNOP00000004232,ENSRNOP00000005995,ENSRNOP00000006188,ENSRNOP00000006426,ENSRNOP00000007788,ENSRNOP00000008722,ENSRNOP00000008972,ENSRNOP00000012588,ENSRNOP00000014785,ENSRNOP00000016942,ENSRNOP00000017000,ENSRNOP00000019192,ENSRNOP00000019403,ENSRNOP00000022679,ENSRNOP00000023628,ENSRNOP00000024084,ENSRNOP00000024430,ENSRNOP00000025064,ENSRNOP00000026637,…	Acta1,Apod,Calu,Capn8,Cav2,Cntn4,Dcx,Hmox1,Hspa4,Hspa5,Igf1,Itgb1,Kras,Mmp2,Myc,Parp1,Pdgfra,Rest,Runx2,S100a1,Scarb1,Sp1,Syk,Txnip,Vegfa,Vim,Wif1
GO.0044767	single-organism developmental process	26	3.06e-07	ENSRNOP00000002837,ENSRNOP00000003077,ENSRNOP00000006188,ENSRNOP00000006426,ENSRNOP00000007788,ENSRNOP00000008722,ENSRNOP00000008972,ENSRNOP00000012588,ENSRNOP00000014785,ENSRNOP00000016942,ENSRNOP00000017000,ENSRNOP00000019192,ENSRNOP00000019403,ENSRNOP00000021819,ENSRNOP00000022679,ENSRNOP00000023256,ENSRNOP00000023628,ENSRNOP00000024084,ENSRNOP00000024430,ENSRNOP00000025064,ENSRNOP00000026637,…	Acta1,Apod,Calu,Canx,Cav2,Cntn4,Dcx,Hmox1,Hspa4,Hspa5,Itgb1,Kras,Mmp2,Myc,Pdgfra,Rest,Runx2,S100a1,Scn2b,Slc2a4,Sp1,Syk,Txnip,Vegfa,Vim,Wif1
GO.0065007	biological regulation	34	3.06e-07	ENSRNOP00000002837,ENSRNOP00000003077,ENSRNOP00000004232,ENSRNOP00000005311,ENSRNOP00000005995,ENSRNOP00000006188,ENSRNOP00000006238,ENSRNOP00000006426,ENSRNOP00000007788,ENSRNOP00000008722,ENSRNOP00000008930,ENSRNOP00000008972,ENSRNOP00000009179,ENSRNOP00000009402,ENSRNOP00000012137,ENSRNOP00000014785,ENSRNOP00000016942,ENSRNOP00000018877,ENSRNOP00000019192,ENSRNOP00000019267,ENSRNOP00000022679,…	Acta1,Apod,Calm1,Calu,Cav2,Cntn4,Col1a1,Dcx,Dhcr24,Grpel1,Hif1a,Hmox1,Hspa4,Hspa8,Igf1,Igf1r,Il6st,Itgb1,Kcnj16,Mmp2,Myc,Parp1,Pdgfra,Pparg,Ppia,Rest,Runx2,Scarb1,Slc17a7,Slc2a4,Syk,Vegfa,Vim,Wif1
GO.0042592	homeostatic process	15	3.22e-07	ENSRNOP00000003077,ENSRNOP00000004232,ENSRNOP00000006188,ENSRNOP00000012137,ENSRNOP00000012588,ENSRNOP00000014785,ENSRNOP00000018877,ENSRNOP00000019192,ENSRNOP00000019403,ENSRNOP00000020528,ENSRNOP00000023256,ENSRNOP00000026760,ENSRNOP00000042230,ENSRNOP00000060874,ENSRNOP00000063604	Ctgf,Hif1a,Hmox1,Il6st,Itgb1,Kras,Myc,Parp1,Pdgfra,Pparg,Scarb1,Slc17a7,Slc2a4,Sp1,Stat3
GO.0048523	negative regulation of cellular process	22	3.22e-07	ENSRNOP00000002837,ENSRNOP00000003077,ENSRNOP00000004956,ENSRNOP00000005311,ENSRNOP00000005995,ENSRNOP00000006188,ENSRNOP00000007788,ENSRNOP00000008722,ENSRNOP00000009179,ENSRNOP00000009402,ENSRNOP00000012588,ENSRNOP00000014785,ENSRNOP00000017000,ENSRNOP00000020528,ENSRNOP00000022679,ENSRNOP00000023628,ENSRNOP00000025064,ENSRNOP00000026637,ENSRNOP00000027773,ENSRNOP00000042230,ENSRNOP00000058593,…	Actn4,Apod,Cav2,Cntn4,Col1a1,Col3a1,Ctgf,Dhcr24,Hif1a,Hspa4,Hspa5,Hspa8,Igf1,Itgb1,Kras,Mmp2,Myc,Pdgfra,Ppia,Rest,S100a1,Vegfa
GO.0007399	nervous system development	18	3.29e-07	ENSRNOP00000002837,ENSRNOP00000003077,ENSRNOP00000004956,ENSRNOP00000006188,ENSRNOP00000007788,ENSRNOP00000008972,ENSRNOP00000012137,ENSRNOP00000014785,ENSRNOP00000017000,ENSRNOP00000021819,ENSRNOP00000022679,ENSRNOP00000024430,ENSRNOP00000025064,ENSRNOP00000026637,ENSRNOP00000057733,ENSRNOP00000063604,ENSRNOP00000064368,ENSRNOP00000065381	Apod,Calu,Cntn4,Col3a1,Dcx,Hspa5,Itgb1,Mmp2,Myc,Pdgfra,Pparg,Rest,Runx2,S100a1,Scn2b,Slc17a7,Vegfa,Vim
GO.0051241	negative regulation of multicellular organismal process	13	3.29e-07	ENSRNOP00000002837,ENSRNOP00000003077,ENSRNOP00000004956,ENSRNOP00000006188,ENSRNOP00000007788,ENSRNOP00000012137,ENSRNOP00000014785,ENSRNOP00000019192,ENSRNOP00000022679,ENSRNOP00000026637,ENSRNOP00000026760,ENSRNOP00000042230,ENSRNOP00000064368	Apod,Cntn4,Col3a1,Hif1a,Hmox1,Itgb1,Mmp2,Myc,Pdgfra,Pparg,Rest,Stat3,Vegfa
GO.0031326	regulation of cellular biosynthetic process	20	4.36e-07	ENSRNOP00000002837,ENSRNOP00000003077,ENSRNOP00000004232,ENSRNOP00000005311,ENSRNOP00000005995,ENSRNOP00000006188,ENSRNOP00000012137,ENSRNOP00000012588,ENSRNOP00000017000,ENSRNOP00000019192,ENSRNOP00000019267,ENSRNOP00000026637,ENSRNOP00000027773,ENSRNOP00000028793,ENSRNOP00000042230,ENSRNOP00000057733,ENSRNOP00000058593,ENSRNOP00000060874,ENSRNOP00000063822,ENSRNOP00000064356	Actn4,Bdnf,Calm1,Col1a1,Hif1a,Hmox1,Hspa8,Igf1,Igf1r,Kras,Myc,Parp1,Pdgfra,Pparg,Rest,Runx2,S100a1,Scarb1,Txnip,Vegfa
GO.0070482	response to oxygen levels	11	4.81e-07	ENSRNOP00000003077,ENSRNOP00000005311,ENSRNOP00000012137,ENSRNOP00000020528,ENSRNOP00000022679,ENSRNOP00000023256,ENSRNOP00000026212,ENSRNOP00000026637,ENSRNOP00000027773,ENSRNOP00000042230,ENSRNOP00000064356	Actn4,Bdnf,Col1a1,Ctgf,Hif1a,Mmp2,Notch1,Pdgfra,Pparg,Slc2a4,Vegfa
GO.0044700	single organism signaling	23	4.83e-07	ENSRNOP00000003077,ENSRNOP00000004232,ENSRNOP00000004956,ENSRNOP00000005995,ENSRNOP00000006188,ENSRNOP00000006426,ENSRNOP00000008722,ENSRNOP00000009402,ENSRNOP00000012137,ENSRNOP00000014785,ENSRNOP00000016942,ENSRNOP00000018877,ENSRNOP00000021819,ENSRNOP00000025064,ENSRNOP00000026637,ENSRNOP00000027773,ENSRNOP00000028793,ENSRNOP00000040699,ENSRNOP00000042230,ENSRNOP00000060874,ENSRNOP00000063604,…	Actn4,Calm1,Cav2,Col3a1,Dcx,Dhcr24,Hif1a,Hspa5,Igf1,Il6st,Itgb1,Myc,Parp1,Pdgfra,Pparg,Scarb1,Scn2b,Slc17a7,Stx1a,Syk,Txnip,Vegfa,Wif1
GO.0051171	regulation of nitrogen compound metabolic process	20	5.08e-07	ENSRNOP00000002837,ENSRNOP00000003077,ENSRNOP00000004232,ENSRNOP00000005311,ENSRNOP00000005995,ENSRNOP00000006188,ENSRNOP00000012137,ENSRNOP00000012588,ENSRNOP00000017000,ENSRNOP00000019192,ENSRNOP00000025064,ENSRNOP00000026637,ENSRNOP00000027773,ENSRNOP00000028793,ENSRNOP00000042230,ENSRNOP00000057733,ENSRNOP00000058593,ENSRNOP00000060874,ENSRNOP00000063822,ENSRNOP00000064356	Actn4,Bdnf,Calm1,Col1a1,Hif1a,Hmox1,Hspa5,Hspa8,Igf1,Kras,Myc,Parp1,Pdgfra,Pparg,Rest,Runx2,S100a1,Scarb1,Txnip,Vegfa
GO.0010556	regulation of macromolecule biosynthetic process	19	5.33e-07	ENSRNOP00000002837,ENSRNOP00000003077,ENSRNOP00000004232,ENSRNOP00000005311,ENSRNOP00000005995,ENSRNOP00000006188,ENSRNOP00000012137,ENSRNOP00000012588,ENSRNOP00000017000,ENSRNOP00000019192,ENSRNOP00000019267,ENSRNOP00000020528,ENSRNOP00000026637,ENSRNOP00000027773,ENSRNOP00000028793,ENSRNOP00000042230,ENSRNOP00000057733,ENSRNOP00000058593,ENSRNOP00000064356	Actn4,Bdnf,Col1a1,Ctgf,Hif1a,Hmox1,Hspa8,Igf1,Igf1r,Kras,Myc,Parp1,Pdgfra,Pparg,Rest,Runx2,S100a1,Txnip,Vegfa
GO.0071363	cellular response to growth factor stimulus	10	5.58e-07	ENSRNOP00000003077,ENSRNOP00000004232,ENSRNOP00000004956,ENSRNOP00000005311,ENSRNOP00000020528,ENSRNOP00000024430,ENSRNOP00000026212,ENSRNOP00000026637,ENSRNOP00000057733,ENSRNOP00000064356	Bdnf,Col1a1,Col3a1,Ctgf,Notch1,Parp1,Pdgfra,Runx2,Vegfa,Vim
GO.0001568	blood vessel development	9	7.78e-07	ENSRNOP00000003077,ENSRNOP00000004956,ENSRNOP00000005311,ENSRNOP00000016942,ENSRNOP00000019192,ENSRNOP00000020528,ENSRNOP00000022679,ENSRNOP00000026212,ENSRNOP00000026637	Col1a1,Col3a1,Ctgf,Hmox1,Mmp2,Notch1,Pdgfra,Syk,Vegfa
GO.1901701	cellular response to oxygen-containing compound	13	7.78e-07	ENSRNOP00000004232,ENSRNOP00000004956,ENSRNOP00000006188,ENSRNOP00000008722,ENSRNOP00000009233,ENSRNOP00000014785,ENSRNOP00000022679,ENSRNOP00000023256,ENSRNOP00000026637,ENSRNOP00000026760,ENSRNOP00000042230,ENSRNOP00000060874,ENSRNOP00000064356	Bdnf,Cav2,Col3a1,Hif1a,Insig1,Itgb1,Mmp2,Myc,Parp1,Scarb1,Slc2a4,Stat3,Vegfa
GO.0034097	response to cytokine	11	8.46e-07	ENSRNOP00000003077,ENSRNOP00000004956,ENSRNOP00000005311,ENSRNOP00000006188,ENSRNOP00000012588,ENSRNOP00000018877,ENSRNOP00000022679,ENSRNOP00000025064,ENSRNOP00000026760,ENSRNOP00000042230,ENSRNOP00000064356	Bdnf,Col1a1,Col3a1,Hif1a,Hspa5,Il6st,Kras,Mmp2,Myc,Pdgfra,Stat3
GO.0051049	regulation of transport	17	9.89e-07	ENSRNOP00000002837,ENSRNOP00000004232,ENSRNOP00000005995,ENSRNOP00000006188,ENSRNOP00000006238,ENSRNOP00000012137,ENSRNOP00000014785,ENSRNOP00000016942,ENSRNOP00000017000,ENSRNOP00000018877,ENSRNOP00000019192,ENSRNOP00000025064,ENSRNOP00000026212,ENSRNOP00000027773,ENSRNOP00000060874,ENSRNOP00000063822,ENSRNOP00000064368	Actn4,Apod,Calm1,Hmox1,Hspa5,Igf1,Il6st,Itgb1,Kcnj16,Myc,Notch1,Parp1,Pparg,Rest,S100a1,Scarb1,Syk
GO.0050789	regulation of biological process	32	1.01e-06	ENSRNOP00000002837,ENSRNOP00000003077,ENSRNOP00000004232,ENSRNOP00000005311,ENSRNOP00000005995,ENSRNOP00000006188,ENSRNOP00000006238,ENSRNOP00000006426,ENSRNOP00000007788,ENSRNOP00000008722,ENSRNOP00000008930,ENSRNOP00000008972,ENSRNOP00000009179,ENSRNOP00000009402,ENSRNOP00000012137,ENSRNOP00000014785,ENSRNOP00000016942,ENSRNOP00000018877,ENSRNOP00000019192,ENSRNOP00000019267,ENSRNOP00000022679,…	Acta1,Apod,Calm1,Calu,Cav2,Cntn4,Col1a1,Dcx,Dhcr24,Grpel1,Hif1a,Hmox1,Hspa4,Hspa8,Igf1,Igf1r,Il6st,Itgb1,Kcnj16,Mmp2,Myc,Parp1,Pdgfra,Pparg,Ppia,Rest,Runx2,Scarb1,Syk,Vegfa,Vim,Wif1
GO.0010941	regulation of cell death	15	1.03e-06	ENSRNOP00000002837,ENSRNOP00000005995,ENSRNOP00000006188,ENSRNOP00000009402,ENSRNOP00000012588,ENSRNOP00000019267,ENSRNOP00000020528,ENSRNOP00000022679,ENSRNOP00000023628,ENSRNOP00000025064,ENSRNOP00000026212,ENSRNOP00000026637,ENSRNOP00000027773,ENSRNOP00000028793,ENSRNOP00000042230	Actn4,Ctgf,Dhcr24,Hif1a,Hspa4,Hspa5,Igf1,Igf1r,Kras,Mmp2,Myc,Notch1,Rest,Txnip,Vegfa
GO.0001944	vasculature development	9	1.11e-06	ENSRNOP00000003077,ENSRNOP00000004956,ENSRNOP00000005311,ENSRNOP00000016942,ENSRNOP00000019192,ENSRNOP00000020528,ENSRNOP00000022679,ENSRNOP00000026212,ENSRNOP00000026637	Col1a1,Col3a1,Ctgf,Hmox1,Mmp2,Notch1,Pdgfra,Syk,Vegfa
GO.0009966	regulation of signal transduction	16	1.43e-06	ENSRNOP00000003077,ENSRNOP00000004232,ENSRNOP00000004956,ENSRNOP00000005311,ENSRNOP00000005995,ENSRNOP00000008722,ENSRNOP00000012137,ENSRNOP00000014785,ENSRNOP00000016942,ENSRNOP00000019192,ENSRNOP00000020528,ENSRNOP00000025064,ENSRNOP00000026637,ENSRNOP00000026760,ENSRNOP00000064356,ENSRNOP00000064368	Apod,Bdnf,Cav2,Col1a1,Col3a1,Ctgf,Hmox1,Hspa5,Igf1,Itgb1,Parp1,Pdgfra,Pparg,Stat3,Syk,Vegfa
GO.0030335	positive regulation of cell migration	9	1.57e-06	ENSRNOP00000003077,ENSRNOP00000005311,ENSRNOP00000014785,ENSRNOP00000018877,ENSRNOP00000019267,ENSRNOP00000022679,ENSRNOP00000025064,ENSRNOP00000026212,ENSRNOP00000026637	Col1a1,Hspa5,Igf1r,Il6st,Itgb1,Mmp2,Notch1,Pdgfra,Vegfa
GO.0006950	response to stress	20	1.75e-06	ENSRNOP00000003077,ENSRNOP00000004956,ENSRNOP00000005311,ENSRNOP00000006188,ENSRNOP00000008972,ENSRNOP00000009402,ENSRNOP00000011196,ENSRNOP00000012137,ENSRNOP00000016942,ENSRNOP00000019192,ENSRNOP00000020528,ENSRNOP00000022679,ENSRNOP00000023628,ENSRNOP00000024430,ENSRNOP00000026637,ENSRNOP00000026760,ENSRNOP00000027773,ENSRNOP00000028793,ENSRNOP00000042230,ENSRNOP00000064368	Actn4,Apod,Calu,Col1a1,Col3a1,Ctgf,Dhcr24,Hif1a,Hmox1,Hspa4,Mmp2,Myc,Olr1,Pdgfra,Pparg,Stat3,Syk,Txnip,Vegfa,Vim
GO.0051179	localization	24	1.75e-06	ENSRNOP00000002837,ENSRNOP00000003077,ENSRNOP00000005311,ENSRNOP00000006188,ENSRNOP00000006238,ENSRNOP00000008722,ENSRNOP00000009402,ENSRNOP00000011196,ENSRNOP00000012137,ENSRNOP00000014785,ENSRNOP00000016942,ENSRNOP00000022679,ENSRNOP00000023256,ENSRNOP00000026212,ENSRNOP00000026637,ENSRNOP00000026760,ENSRNOP00000027773,ENSRNOP00000028793,ENSRNOP00000040859,ENSRNOP00000042230,ENSRNOP00000060874,…	Actn4,Apod,Bdnf,Canx,Cav2,Col1a1,Dcx,Dhcr24,Hif1a,Itgb1,Kcnj16,Mmp2,Myc,Notch1,Olr1,Pdgfra,Pparg,Rest,Scarb1,Slc2a4,Stat3,Syk,Txnip,Vegfa
GO.0000302	response to reactive oxygen species	8	1.78e-06	ENSRNOP00000004232,ENSRNOP00000005311,ENSRNOP00000011196,ENSRNOP00000019192,ENSRNOP00000022679,ENSRNOP00000028793,ENSRNOP00000042230,ENSRNOP00000064368	Apod,Col1a1,Hif1a,Hmox1,Mmp2,Olr1,Parp1,Txnip
GO.0009893	positive regulation of metabolic process	19	1.84e-06	ENSRNOP00000002837,ENSRNOP00000003077,ENSRNOP00000004232,ENSRNOP00000005311,ENSRNOP00000005995,ENSRNOP00000006188,ENSRNOP00000008722,ENSRNOP00000012137,ENSRNOP00000012588,ENSRNOP00000014785,ENSRNOP00000019267,ENSRNOP00000023628,ENSRNOP00000024084,ENSRNOP00000025064,ENSRNOP00000026637,ENSRNOP00000042230,ENSRNOP00000060874,ENSRNOP00000063822,ENSRNOP00000064356	Acta1,Bdnf,Calm1,Cav2,Col1a1,Hif1a,Hspa4,Hspa5,Igf1,Igf1r,Itgb1,Kras,Myc,Parp1,Pdgfra,Pparg,Rest,Scarb1,Vegfa
GO.0044093	positive regulation of molecular function	14	1.99e-06	ENSRNOP00000002837,ENSRNOP00000003077,ENSRNOP00000004232,ENSRNOP00000005995,ENSRNOP00000006188,ENSRNOP00000012137,ENSRNOP00000012588,ENSRNOP00000017000,ENSRNOP00000020528,ENSRNOP00000023628,ENSRNOP00000025064,ENSRNOP00000060874,ENSRNOP00000063822,ENSRNOP00000064356	Bdnf,Calm1,Ctgf,Hspa4,Hspa5,Igf1,Kras,Myc,Parp1,Pdgfra,Pparg,Rest,S100a1,Scarb1
GO.0051716	cellular response to stimulus	25	2e-06	ENSRNOP00000002837,ENSRNOP00000003077,ENSRNOP00000004232,ENSRNOP00000004956,ENSRNOP00000005995,ENSRNOP00000006188,ENSRNOP00000006426,ENSRNOP00000008722,ENSRNOP00000008972,ENSRNOP00000009233,ENSRNOP00000009402,ENSRNOP00000014785,ENSRNOP00000016942,ENSRNOP00000018877,ENSRNOP00000019192,ENSRNOP00000022679,ENSRNOP00000024084,ENSRNOP00000024430,ENSRNOP00000026637,ENSRNOP00000027773,ENSRNOP00000057733,…	Acta1,Actn4,Apod,Calm1,Calu,Cav2,Col3a1,Dcx,Dhcr24,Hmox1,Igf1,Il6st,Insig1,Itgb1,Mmp2,Myc,Parp1,Pdgfra,Rest,Runx2,Scarb1,Syk,Vegfa,Vim,Wif1
GO.0050790	regulation of catalytic activity	16	2.11e-06	ENSRNOP00000002837,ENSRNOP00000003077,ENSRNOP00000005995,ENSRNOP00000006188,ENSRNOP00000008930,ENSRNOP00000008972,ENSRNOP00000009179,ENSRNOP00000009402,ENSRNOP00000012588,ENSRNOP00000019267,ENSRNOP00000020528,ENSRNOP00000025064,ENSRNOP00000026212,ENSRNOP00000028793,ENSRNOP00000060874,ENSRNOP00000063822	Calm1,Calu,Ctgf,Dhcr24,Grpel1,Hspa5,Igf1,Igf1r,Kras,Myc,Notch1,Pdgfra,Ppia,Rest,Scarb1,Txnip
GO.0048514	blood vessel morphogenesis	8	2.53e-06	ENSRNOP00000003077,ENSRNOP00000004956,ENSRNOP00000016942,ENSRNOP00000019192,ENSRNOP00000020528,ENSRNOP00000022679,ENSRNOP00000026212,ENSRNOP00000026637	Col3a1,Ctgf,Hmox1,Mmp2,Notch1,Pdgfra,Syk,Vegfa
GO.0060548	negative regulation of cell death	12	2.68e-06	ENSRNOP00000005995,ENSRNOP00000006188,ENSRNOP00000009402,ENSRNOP00000012588,ENSRNOP00000019267,ENSRNOP00000020528,ENSRNOP00000023628,ENSRNOP00000025064,ENSRNOP00000026212,ENSRNOP00000026637,ENSRNOP00000042230,ENSRNOP00000064356	Bdnf,Ctgf,Dhcr24,Hif1a,Hspa4,Hspa5,Igf1,Igf1r,Kras,Myc,Notch1,Vegfa
GO.0019219	regulation of nucleobase-containing compound metabolic process	18	3.16e-06	ENSRNOP00000002837,ENSRNOP00000003077,ENSRNOP00000004232,ENSRNOP00000005311,ENSRNOP00000006188,ENSRNOP00000012137,ENSRNOP00000012588,ENSRNOP00000017000,ENSRNOP00000019192,ENSRNOP00000025064,ENSRNOP00000026637,ENSRNOP00000027773,ENSRNOP00000028793,ENSRNOP00000042230,ENSRNOP00000057733,ENSRNOP00000058593,ENSRNOP00000063822,ENSRNOP00000064356	Actn4,Bdnf,Calm1,Col1a1,Hif1a,Hmox1,Hspa5,Hspa8,Kras,Myc,Parp1,Pdgfra,Pparg,Rest,Runx2,S100a1,Txnip,Vegfa
GO.0010243	response to organonitrogen compound	14	3.17e-06	ENSRNOP00000004232,ENSRNOP00000004956,ENSRNOP00000008722,ENSRNOP00000009233,ENSRNOP00000019192,ENSRNOP00000020528,ENSRNOP00000022679,ENSRNOP00000023256,ENSRNOP00000026212,ENSRNOP00000026637,ENSRNOP00000026760,ENSRNOP00000042230,ENSRNOP00000063822,ENSRNOP00000064356	Bdnf,Calm1,Cav2,Col3a1,Ctgf,Hif1a,Hmox1,Insig1,Mmp2,Notch1,Parp1,Slc2a4,Stat3,Vegfa
GO.0031325	positive regulation of cellular metabolic process	17	3.17e-06	ENSRNOP00000002837,ENSRNOP00000003077,ENSRNOP00000004232,ENSRNOP00000005311,ENSRNOP00000005995,ENSRNOP00000006188,ENSRNOP00000008722,ENSRNOP00000012137,ENSRNOP00000012588,ENSRNOP00000014785,ENSRNOP00000019267,ENSRNOP00000025064,ENSRNOP00000026637,ENSRNOP00000042230,ENSRNOP00000060874,ENSRNOP00000063822,ENSRNOP00000064356	Bdnf,Calm1,Cav2,Col1a1,Hif1a,Hspa5,Igf1,Igf1r,Itgb1,Kras,Myc,Parp1,Pdgfra,Pparg,Rest,Scarb1,Vegfa
GO.0032870	cellular response to hormone stimulus	11	3.54e-06	ENSRNOP00000002837,ENSRNOP00000004232,ENSRNOP00000006188,ENSRNOP00000008722,ENSRNOP00000009233,ENSRNOP00000022679,ENSRNOP00000023256,ENSRNOP00000026212,ENSRNOP00000026637,ENSRNOP00000026760,ENSRNOP00000042230	Cav2,Hif1a,Insig1,Mmp2,Myc,Notch1,Parp1,Rest,Slc2a4,Stat3,Vegfa
GO.0051602	response to electrical stimulus	6	3.62e-06	ENSRNOP00000002837,ENSRNOP00000005995,ENSRNOP00000022679,ENSRNOP00000042230,ENSRNOP00000064356,ENSRNOP00000065381	Bdnf,Dcx,Hif1a,Igf1,Mmp2,Rest
GO.0007154	cell communication	22	4.06e-06	ENSRNOP00000003077,ENSRNOP00000004232,ENSRNOP00000004956,ENSRNOP00000005311,ENSRNOP00000005995,ENSRNOP00000006188,ENSRNOP00000006426,ENSRNOP00000008722,ENSRNOP00000009402,ENSRNOP00000014785,ENSRNOP00000016942,ENSRNOP00000018877,ENSRNOP00000025064,ENSRNOP00000026637,ENSRNOP00000027773,ENSRNOP00000028793,ENSRNOP00000040699,ENSRNOP00000042230,ENSRNOP00000060874,ENSRNOP00000063604,ENSRNOP00000063822,…	Actn4,Calm1,Cav2,Col1a1,Col3a1,Dcx,Dhcr24,Hif1a,Hspa5,Igf1,Il6st,Itgb1,Myc,Parp1,Pdgfra,Scarb1,Slc17a7,Stx1a,Syk,Txnip,Vegfa,Wif1
GO.0009891	positive regulation of biosynthetic process	14	4.06e-06	ENSRNOP00000003077,ENSRNOP00000004232,ENSRNOP00000005311,ENSRNOP00000005995,ENSRNOP00000006188,ENSRNOP00000012137,ENSRNOP00000012588,ENSRNOP00000019267,ENSRNOP00000020528,ENSRNOP00000026637,ENSRNOP00000042230,ENSRNOP00000060874,ENSRNOP00000063822,ENSRNOP00000064356	Bdnf,Calm1,Col1a1,Ctgf,Hif1a,Igf1,Igf1r,Kras,Myc,Parp1,Pdgfra,Pparg,Scarb1,Vegfa
GO.0050896	response to stimulus	28	4.06e-06	ENSRNOP00000002837,ENSRNOP00000003077,ENSRNOP00000004232,ENSRNOP00000005995,ENSRNOP00000006188,ENSRNOP00000006426,ENSRNOP00000008722,ENSRNOP00000008972,ENSRNOP00000009233,ENSRNOP00000009402,ENSRNOP00000011196,ENSRNOP00000014785,ENSRNOP00000016942,ENSRNOP00000018877,ENSRNOP00000019192,ENSRNOP00000021819,ENSRNOP00000022679,ENSRNOP00000023628,ENSRNOP00000024084,ENSRNOP00000024430,ENSRNOP00000026637,…	Acta1,Actn4,Apod,Calm1,Calu,Cav2,Dcx,Dhcr24,Hmox1,Hspa4,Igf1,Il6st,Insig1,Itgb1,Mmp2,Myc,Olr1,Parp1,Pdgfra,Rest,Runx2,Scarb1,Scn2b,Stx1a,Syk,Vegfa,Vim,Wif1
GO.2000026	regulation of multicellular organismal development	14	4.32e-06	ENSRNOP00000002837,ENSRNOP00000004956,ENSRNOP00000005311,ENSRNOP00000006188,ENSRNOP00000007788,ENSRNOP00000012137,ENSRNOP00000014785,ENSRNOP00000016942,ENSRNOP00000019192,ENSRNOP00000020528,ENSRNOP00000023628,ENSRNOP00000024430,ENSRNOP00000026637,ENSRNOP00000026760	Cntn4,Col1a1,Col3a1,Ctgf,Hmox1,Hspa4,Itgb1,Myc,Pparg,Rest,Stat3,Syk,Vegfa,Vim
GO.0043170	macromolecule metabolic process	26	4.39e-06	ENSRNOP00000002837,ENSRNOP00000003077,ENSRNOP00000004232,ENSRNOP00000004956,ENSRNOP00000005311,ENSRNOP00000006188,ENSRNOP00000008930,ENSRNOP00000009402,ENSRNOP00000011196,ENSRNOP00000012137,ENSRNOP00000016942,ENSRNOP00000019403,ENSRNOP00000020528,ENSRNOP00000023256,ENSRNOP00000025064,ENSRNOP00000026212,ENSRNOP00000026637,ENSRNOP00000026760,ENSRNOP00000028793,ENSRNOP00000040859,ENSRNOP00000042230,…	Canx,Capn8,Col1a1,Col3a1,Ctgf,Dcx,Dhcr24,Grpel1,Hif1a,Hspa5,Hspa8,Myc,Notch1,Olr1,Parp1,Pdgfra,Pparg,Rest,Runx2,Slc2a4,Sp1,Stat3,Syk,Txnip,Ubb,Vegfa
GO.0031960	response to corticosteroid	9	4.54e-06	ENSRNOP00000002837,ENSRNOP00000005311,ENSRNOP00000005995,ENSRNOP00000012588,ENSRNOP00000020528,ENSRNOP00000026212,ENSRNOP00000026637,ENSRNOP00000042230,ENSRNOP00000063822	Calm1,Col1a1,Ctgf,Hif1a,Igf1,Kras,Notch1,Rest,Vegfa
GO.0071345	cellular response to cytokine stimulus	9	4.6e-06	ENSRNOP00000005311,ENSRNOP00000006188,ENSRNOP00000012588,ENSRNOP00000018877,ENSRNOP00000022679,ENSRNOP00000025064,ENSRNOP00000026760,ENSRNOP00000042230,ENSRNOP00000064356	Bdnf,Col1a1,Hif1a,Hspa5,Il6st,Kras,Mmp2,Myc,Stat3
GO.0072358	cardiovascular system development	10	4.6e-06	ENSRNOP00000002837,ENSRNOP00000003077,ENSRNOP00000004956,ENSRNOP00000005311,ENSRNOP00000012137,ENSRNOP00000016942,ENSRNOP00000019192,ENSRNOP00000020528,ENSRNOP00000022679,ENSRNOP00000026637	Col1a1,Col3a1,Ctgf,Hmox1,Mmp2,Pdgfra,Pparg,Rest,Syk,Vegfa
GO.0072359	circulatory system development	10	4.6e-06	ENSRNOP00000002837,ENSRNOP00000003077,ENSRNOP00000004956,ENSRNOP00000005311,ENSRNOP00000012137,ENSRNOP00000016942,ENSRNOP00000019192,ENSRNOP00000020528,ENSRNOP00000022679,ENSRNOP00000026637	Col1a1,Col3a1,Ctgf,Hmox1,Mmp2,Pdgfra,Pparg,Rest,Syk,Vegfa
GO.0010468	regulation of gene expression	18	4.72e-06	ENSRNOP00000002837,ENSRNOP00000004232,ENSRNOP00000005311,ENSRNOP00000005995,ENSRNOP00000006188,ENSRNOP00000012137,ENSRNOP00000012588,ENSRNOP00000017000,ENSRNOP00000019192,ENSRNOP00000019267,ENSRNOP00000023628,ENSRNOP00000024084,ENSRNOP00000026637,ENSRNOP00000028793,ENSRNOP00000042230,ENSRNOP00000057733,ENSRNOP00000058593,ENSRNOP00000064356	Acta1,Bdnf,Col1a1,Hif1a,Hmox1,Hspa4,Hspa8,Igf1,Igf1r,Kras,Myc,Parp1,Pparg,Rest,Runx2,S100a1,Txnip,Vegfa
GO.0023051	regulation of signaling	17	4.72e-06	ENSRNOP00000002837,ENSRNOP00000003077,ENSRNOP00000004232,ENSRNOP00000004956,ENSRNOP00000005311,ENSRNOP00000005995,ENSRNOP00000008722,ENSRNOP00000012137,ENSRNOP00000014785,ENSRNOP00000016942,ENSRNOP00000018877,ENSRNOP00000019192,ENSRNOP00000020528,ENSRNOP00000025064,ENSRNOP00000026637,ENSRNOP00000026760,ENSRNOP00000064368	Apod,Cav2,Col1a1,Col3a1,Ctgf,Hmox1,Hspa5,Igf1,Il6st,Itgb1,Parp1,Pdgfra,Pparg,Rest,Stat3,Syk,Vegfa
GO.0071417	cellular response to organonitrogen compound	10	4.72e-06	ENSRNOP00000004232,ENSRNOP00000004956,ENSRNOP00000005311,ENSRNOP00000008722,ENSRNOP00000009233,ENSRNOP00000012137,ENSRNOP00000023256,ENSRNOP00000026760,ENSRNOP00000042230,ENSRNOP00000064356	Bdnf,Cav2,Col1a1,Col3a1,Hif1a,Insig1,Parp1,Pparg,Slc2a4,Stat3
GO.0045937	positive regulation of phosphate metabolic process	12	5.1e-06	ENSRNOP00000003077,ENSRNOP00000005995,ENSRNOP00000006188,ENSRNOP00000008722,ENSRNOP00000012588,ENSRNOP00000014785,ENSRNOP00000019267,ENSRNOP00000025064,ENSRNOP00000026637,ENSRNOP00000026760,ENSRNOP00000063822,ENSRNOP00000064356	Bdnf,Calm1,Cav2,Hspa5,Igf1,Igf1r,Itgb1,Kras,Myc,Pdgfra,Stat3,Vegfa
GO.0019220	regulation of phosphate metabolic process	14	5.14e-06	ENSRNOP00000003077,ENSRNOP00000005995,ENSRNOP00000006188,ENSRNOP00000008722,ENSRNOP00000009179,ENSRNOP00000012588,ENSRNOP00000014785,ENSRNOP00000016942,ENSRNOP00000023628,ENSRNOP00000025064,ENSRNOP00000026637,ENSRNOP00000060874,ENSRNOP00000063822,ENSRNOP00000064356	Bdnf,Calm1,Cav2,Hspa4,Hspa5,Igf1,Itgb1,Kras,Myc,Pdgfra,Ppia,Scarb1,Syk,Vegfa
GO.0010646	regulation of cell communication	17	5.36e-06	ENSRNOP00000002837,ENSRNOP00000003077,ENSRNOP00000004232,ENSRNOP00000004956,ENSRNOP00000005311,ENSRNOP00000005995,ENSRNOP00000008722,ENSRNOP00000012137,ENSRNOP00000014785,ENSRNOP00000016942,ENSRNOP00000018877,ENSRNOP00000019192,ENSRNOP00000020528,ENSRNOP00000025064,ENSRNOP00000026637,ENSRNOP00000026760,ENSRNOP00000064368	Apod,Cav2,Col1a1,Col3a1,Ctgf,Hmox1,Hspa5,Igf1,Il6st,Itgb1,Parp1,Pdgfra,Pparg,Rest,Stat3,Syk,Vegfa
GO.1903506	regulation of nucleic acid-templated transcription	16	6.16e-06	ENSRNOP00000002837,ENSRNOP00000004232,ENSRNOP00000005311,ENSRNOP00000006188,ENSRNOP00000012137,ENSRNOP00000012588,ENSRNOP00000017000,ENSRNOP00000019192,ENSRNOP00000019267,ENSRNOP00000026637,ENSRNOP00000027773,ENSRNOP00000028793,ENSRNOP00000042230,ENSRNOP00000057733,ENSRNOP00000058593,ENSRNOP00000064356	Actn4,Bdnf,Col1a1,Hif1a,Hmox1,Hspa8,Igf1r,Kras,Myc,Parp1,Pparg,Rest,Runx2,S100a1,Txnip,Vegfa
GO.0043069	negative regulation of programmed cell death	11	6.33e-06	ENSRNOP00000005995,ENSRNOP00000009402,ENSRNOP00000012588,ENSRNOP00000019267,ENSRNOP00000023628,ENSRNOP00000025064,ENSRNOP00000026212,ENSRNOP00000026637,ENSRNOP00000026760,ENSRNOP00000042230,ENSRNOP00000064356	Bdnf,Dhcr24,Hif1a,Hspa4,Hspa5,Igf1,Igf1r,Kras,Notch1,Stat3,Vegfa
GO.0006810	transport	21	6.63e-06	ENSRNOP00000002837,ENSRNOP00000005311,ENSRNOP00000006188,ENSRNOP00000006238,ENSRNOP00000008722,ENSRNOP00000011196,ENSRNOP00000012137,ENSRNOP00000014785,ENSRNOP00000016942,ENSRNOP00000020528,ENSRNOP00000023256,ENSRNOP00000025064,ENSRNOP00000026212,ENSRNOP00000026760,ENSRNOP00000027773,ENSRNOP00000028793,ENSRNOP00000040859,ENSRNOP00000042230,ENSRNOP00000060874,ENSRNOP00000064356,ENSRNOP00000064368	Actn4,Apod,Bdnf,Canx,Cav2,Col1a1,Ctgf,Hif1a,Hspa5,Itgb1,Kcnj16,Myc,Notch1,Olr1,Pparg,Rest,Scarb1,Slc2a4,Stat3,Syk,Txnip
GO.0010604	positive regulation of macromolecule metabolic process	16	6.72e-06	ENSRNOP00000002837,ENSRNOP00000003077,ENSRNOP00000004232,ENSRNOP00000005311,ENSRNOP00000005995,ENSRNOP00000006188,ENSRNOP00000008722,ENSRNOP00000012137,ENSRNOP00000012588,ENSRNOP00000014785,ENSRNOP00000023628,ENSRNOP00000024084,ENSRNOP00000025064,ENSRNOP00000026637,ENSRNOP00000042230,ENSRNOP00000064356	Acta1,Bdnf,Cav2,Col1a1,Hif1a,Hspa4,Hspa5,Igf1,Itgb1,Kras,Myc,Parp1,Pdgfra,Pparg,Rest,Vegfa
GO.0007584	response to nutrient	9	6.77e-06	ENSRNOP00000005311,ENSRNOP00000012137,ENSRNOP00000014785,ENSRNOP00000018877,ENSRNOP00000019192,ENSRNOP00000019267,ENSRNOP00000024430,ENSRNOP00000026637,ENSRNOP00000064356	Bdnf,Col1a1,Hmox1,Igf1r,Il6st,Itgb1,Pparg,Vegfa,Vim
GO.2000112	regulation of cellular macromolecule biosynthetic process	17	8.2e-06	ENSRNOP00000002837,ENSRNOP00000003077,ENSRNOP00000004232,ENSRNOP00000005311,ENSRNOP00000005995,ENSRNOP00000006188,ENSRNOP00000012137,ENSRNOP00000012588,ENSRNOP00000017000,ENSRNOP00000019192,ENSRNOP00000019267,ENSRNOP00000026637,ENSRNOP00000028793,ENSRNOP00000042230,ENSRNOP00000057733,ENSRNOP00000058593,ENSRNOP00000064356	Bdnf,Col1a1,Hif1a,Hmox1,Hspa8,Igf1,Igf1r,Kras,Myc,Parp1,Pdgfra,Pparg,Rest,Runx2,S100a1,Txnip,Vegfa
GO.0051246	regulation of protein metabolic process	16	8.49e-06	ENSRNOP00000002837,ENSRNOP00000003077,ENSRNOP00000005995,ENSRNOP00000006188,ENSRNOP00000008722,ENSRNOP00000009179,ENSRNOP00000009402,ENSRNOP00000012137,ENSRNOP00000012588,ENSRNOP00000014785,ENSRNOP00000016942,ENSRNOP00000023628,ENSRNOP00000025064,ENSRNOP00000026637,ENSRNOP00000064356,ENSRNOP00000064368	Apod,Bdnf,Cav2,Dhcr24,Hspa4,Hspa5,Igf1,Itgb1,Kras,Myc,Pdgfra,Pparg,Ppia,Rest,Syk,Vegfa
GO.0006979	response to oxidative stress	9	8.85e-06	ENSRNOP00000004232,ENSRNOP00000005311,ENSRNOP00000009402,ENSRNOP00000011196,ENSRNOP00000019192,ENSRNOP00000022679,ENSRNOP00000028793,ENSRNOP00000042230,ENSRNOP00000064368	Apod,Col1a1,Dhcr24,Hif1a,Hmox1,Mmp2,Olr1,Parp1,Txnip
GO.0007165	signal transduction	20	9.43e-06	ENSRNOP00000003077,ENSRNOP00000004232,ENSRNOP00000004956,ENSRNOP00000005995,ENSRNOP00000006188,ENSRNOP00000006426,ENSRNOP00000008722,ENSRNOP00000009402,ENSRNOP00000012137,ENSRNOP00000014785,ENSRNOP00000016942,ENSRNOP00000018877,ENSRNOP00000025064,ENSRNOP00000026637,ENSRNOP00000027773,ENSRNOP00000028793,ENSRNOP00000042230,ENSRNOP00000060874,ENSRNOP00000063822,ENSRNOP00000065381	Actn4,Calm1,Cav2,Col3a1,Dcx,Dhcr24,Hif1a,Hspa5,Igf1,Il6st,Itgb1,Myc,Parp1,Pdgfra,Pparg,Scarb1,Syk,Txnip,Vegfa,Wif1
GO.0051094	positive regulation of developmental process	12	9.89e-06	ENSRNOP00000005311,ENSRNOP00000005995,ENSRNOP00000006188,ENSRNOP00000006426,ENSRNOP00000012137,ENSRNOP00000014785,ENSRNOP00000016942,ENSRNOP00000019192,ENSRNOP00000020528,ENSRNOP00000023628,ENSRNOP00000024430,ENSRNOP00000026637	Col1a1,Ctgf,Hmox1,Hspa4,Igf1,Itgb1,Myc,Pparg,Syk,Vegfa,Vim,Wif1
GO.0032270	positive regulation of cellular protein metabolic process	12	1.1e-05	ENSRNOP00000002837,ENSRNOP00000003077,ENSRNOP00000005995,ENSRNOP00000006188,ENSRNOP00000008722,ENSRNOP00000012137,ENSRNOP00000012588,ENSRNOP00000014785,ENSRNOP00000019267,ENSRNOP00000025064,ENSRNOP00000026637,ENSRNOP00000064356	Bdnf,Cav2,Hspa5,Igf1,Igf1r,Itgb1,Kras,Myc,Pdgfra,Pparg,Rest,Vegfa
GO.0001525	angiogenesis	7	1.23e-05	ENSRNOP00000003077,ENSRNOP00000016942,ENSRNOP00000019192,ENSRNOP00000020528,ENSRNOP00000022679,ENSRNOP00000026212,ENSRNOP00000026637	Ctgf,Hmox1,Mmp2,Notch1,Pdgfra,Syk,Vegfa
GO.0022008	neurogenesis	13	1.3e-05	ENSRNOP00000002837,ENSRNOP00000003077,ENSRNOP00000004956,ENSRNOP00000007788,ENSRNOP00000008972,ENSRNOP00000012137,ENSRNOP00000014785,ENSRNOP00000019267,ENSRNOP00000022679,ENSRNOP00000024430,ENSRNOP00000057733,ENSRNOP00000064368,ENSRNOP00000065381	Apod,Calu,Cntn4,Col3a1,Dcx,Igf1r,Itgb1,Mmp2,Pdgfra,Pparg,Rest,Runx2,Vim
GO.0050794	regulation of cellular process	29	1.31e-05	ENSRNOP00000002837,ENSRNOP00000003077,ENSRNOP00000004232,ENSRNOP00000005311,ENSRNOP00000005995,ENSRNOP00000006188,ENSRNOP00000006238,ENSRNOP00000006426,ENSRNOP00000007788,ENSRNOP00000008722,ENSRNOP00000009179,ENSRNOP00000009402,ENSRNOP00000012137,ENSRNOP00000014785,ENSRNOP00000016942,ENSRNOP00000017000,ENSRNOP00000018877,ENSRNOP00000019192,ENSRNOP00000019267,ENSRNOP00000022679,ENSRNOP00000023628,…	Apod,Calm1,Cav2,Cntn4,Col1a1,Dcx,Dhcr24,Hif1a,Hmox1,Hspa4,Hspa8,Igf1,Igf1r,Il6st,Itgb1,Kcnj16,Mmp2,Myc,Parp1,Pdgfra,Pparg,Ppia,Rest,Runx2,S100a1,Syk,Vegfa,Vim,Wif1
GO.0042060	wound healing	8	1.36e-05	ENSRNOP00000003077,ENSRNOP00000004956,ENSRNOP00000005311,ENSRNOP00000019192,ENSRNOP00000024430,ENSRNOP00000026212,ENSRNOP00000026637,ENSRNOP00000064368	Apod,Col1a1,Col3a1,Hmox1,Notch1,Pdgfra,Vegfa,Vim
GO.0009991	response to extracellular stimulus	11	1.39e-05	ENSRNOP00000005311,ENSRNOP00000005995,ENSRNOP00000014785,ENSRNOP00000018877,ENSRNOP00000019192,ENSRNOP00000019267,ENSRNOP00000024084,ENSRNOP00000024430,ENSRNOP00000025064,ENSRNOP00000026637,ENSRNOP00000064356	Acta1,Bdnf,Col1a1,Hmox1,Hspa5,Igf1,Igf1r,Il6st,Itgb1,Vegfa,Vim
GO.0008285	negative regulation of cell proliferation	9	1.42e-05	ENSRNOP00000002837,ENSRNOP00000008722,ENSRNOP00000009402,ENSRNOP00000014785,ENSRNOP00000019192,ENSRNOP00000026212,ENSRNOP00000026760,ENSRNOP00000064356,ENSRNOP00000064368	Apod,Bdnf,Cav2,Dhcr24,Hmox1,Itgb1,Notch1,Rest,Stat3
GO.0051128	regulation of cellular component organization	15	1.42e-05	ENSRNOP00000005311,ENSRNOP00000005995,ENSRNOP00000006188,ENSRNOP00000012137,ENSRNOP00000014785,ENSRNOP00000016942,ENSRNOP00000019267,ENSRNOP00000020528,ENSRNOP00000024430,ENSRNOP00000026212,ENSRNOP00000026637,ENSRNOP00000027773,ENSRNOP00000040699,ENSRNOP00000060874,ENSRNOP00000064368	Actn4,Apod,Col1a1,Ctgf,Igf1,Igf1r,Itgb1,Myc,Notch1,Pparg,Scarb1,Stx1a,Syk,Vegfa,Vim
GO.0051704	multi-organism process	14	1.42e-05	ENSRNOP00000002837,ENSRNOP00000005995,ENSRNOP00000006188,ENSRNOP00000012588,ENSRNOP00000014785,ENSRNOP00000016942,ENSRNOP00000019403,ENSRNOP00000022679,ENSRNOP00000024430,ENSRNOP00000026212,ENSRNOP00000026637,ENSRNOP00000026760,ENSRNOP00000042230,ENSRNOP00000060874	Hif1a,Igf1,Itgb1,Kras,Mmp2,Myc,Notch1,Rest,Scarb1,Sp1,Stat3,Syk,Vegfa,Vim
GO.0001101	response to acid chemical	9	1.46e-05	ENSRNOP00000004956,ENSRNOP00000006188,ENSRNOP00000009233,ENSRNOP00000012137,ENSRNOP00000020528,ENSRNOP00000022679,ENSRNOP00000026637,ENSRNOP00000042230,ENSRNOP00000064356	Bdnf,Col3a1,Ctgf,Hif1a,Insig1,Mmp2,Myc,Pparg,Vegfa
GO.0033273	response to vitamin	7	1.54e-05	ENSRNOP00000005311,ENSRNOP00000012137,ENSRNOP00000014785,ENSRNOP00000019267,ENSRNOP00000024430,ENSRNOP00000026637,ENSRNOP00000064356	Bdnf,Col1a1,Igf1r,Itgb1,Pparg,Vegfa,Vim
GO.0031328	positive regulation of cellular biosynthetic process	13	1.64e-05	ENSRNOP00000003077,ENSRNOP00000004232,ENSRNOP00000005311,ENSRNOP00000005995,ENSRNOP00000006188,ENSRNOP00000012137,ENSRNOP00000012588,ENSRNOP00000019267,ENSRNOP00000026637,ENSRNOP00000042230,ENSRNOP00000060874,ENSRNOP00000063822,ENSRNOP00000064356	Bdnf,Calm1,Col1a1,Hif1a,Igf1,Igf1r,Kras,Myc,Parp1,Pdgfra,Pparg,Scarb1,Vegfa
GO.1901652	response to peptide	10	1.67e-05	ENSRNOP00000004232,ENSRNOP00000005311,ENSRNOP00000008722,ENSRNOP00000009233,ENSRNOP00000012137,ENSRNOP00000020528,ENSRNOP00000023256,ENSRNOP00000026212,ENSRNOP00000026760,ENSRNOP00000042230	Cav2,Col1a1,Ctgf,Hif1a,Insig1,Notch1,Parp1,Pparg,Slc2a4,Stat3
GO.0071704	organic substance metabolic process	29	1.7e-05	ENSRNOP00000002837,ENSRNOP00000003077,ENSRNOP00000004232,ENSRNOP00000004956,ENSRNOP00000005311,ENSRNOP00000006188,ENSRNOP00000008930,ENSRNOP00000009233,ENSRNOP00000011196,ENSRNOP00000016942,ENSRNOP00000018877,ENSRNOP00000019192,ENSRNOP00000019403,ENSRNOP00000020528,ENSRNOP00000023256,ENSRNOP00000025064,ENSRNOP00000026212,ENSRNOP00000026637,ENSRNOP00000026760,ENSRNOP00000028793,ENSRNOP00000040859,…	Apod,Bdnf,Canx,Capn8,Col1a1,Col3a1,Ctgf,Dcx,Grpel1,Hif1a,Hmox1,Hspa5,Hspa8,Il6st,Insig1,Myc,Notch1,Olr1,Parp1,Pdgfra,Rest,Runx2,Slc2a4,Sp1,Stat3,Syk,Txnip,Ubb,Vegfa
GO.0010557	positive regulation of macromolecule biosynthetic process	12	1.85e-05	ENSRNOP00000003077,ENSRNOP00000004232,ENSRNOP00000005311,ENSRNOP00000005995,ENSRNOP00000006188,ENSRNOP00000012137,ENSRNOP00000012588,ENSRNOP00000019267,ENSRNOP00000020528,ENSRNOP00000026637,ENSRNOP00000042230,ENSRNOP00000064356	Bdnf,Col1a1,Ctgf,Hif1a,Igf1,Igf1r,Kras,Myc,Parp1,Pdgfra,Pparg,Vegfa
GO.0008284	positive regulation of cell proliferation	10	1.95e-05	ENSRNOP00000003077,ENSRNOP00000006188,ENSRNOP00000012588,ENSRNOP00000016942,ENSRNOP00000019192,ENSRNOP00000020528,ENSRNOP00000024430,ENSRNOP00000026637,ENSRNOP00000026760,ENSRNOP00000042230	Ctgf,Hif1a,Hmox1,Kras,Myc,Pdgfra,Stat3,Syk,Vegfa,Vim
GO.0044344	cellular response to fibroblast growth factor stimulus	5	1.95e-05	ENSRNOP00000005311,ENSRNOP00000020528,ENSRNOP00000024430,ENSRNOP00000026637,ENSRNOP00000057733	Col1a1,Ctgf,Runx2,Vegfa,Vim
GO.0065008	regulation of biological quality	18	1.95e-05	ENSRNOP00000002837,ENSRNOP00000003077,ENSRNOP00000004232,ENSRNOP00000006188,ENSRNOP00000012137,ENSRNOP00000012588,ENSRNOP00000014785,ENSRNOP00000018877,ENSRNOP00000019403,ENSRNOP00000020528,ENSRNOP00000021819,ENSRNOP00000023256,ENSRNOP00000025064,ENSRNOP00000026637,ENSRNOP00000026760,ENSRNOP00000040699,ENSRNOP00000042230,ENSRNOP00000063604	Ctgf,Hif1a,Hspa5,Il6st,Itgb1,Kras,Myc,Parp1,Pdgfra,Pparg,Rest,Scn2b,Slc17a7,Slc2a4,Sp1,Stat3,Stx1a,Vegfa
GO.0048519	negative regulation of biological process	20	2.04e-05	ENSRNOP00000002837,ENSRNOP00000003077,ENSRNOP00000005311,ENSRNOP00000005995,ENSRNOP00000006188,ENSRNOP00000007788,ENSRNOP00000008722,ENSRNOP00000008972,ENSRNOP00000009179,ENSRNOP00000009402,ENSRNOP00000012588,ENSRNOP00000014785,ENSRNOP00000017000,ENSRNOP00000022679,ENSRNOP00000023628,ENSRNOP00000026637,ENSRNOP00000027773,ENSRNOP00000042230,ENSRNOP00000058593,ENSRNOP00000064368	Actn4,Apod,Calu,Cav2,Cntn4,Col1a1,Dhcr24,Hif1a,Hspa4,Hspa8,Igf1,Itgb1,Kras,Mmp2,Myc,Pdgfra,Ppia,Rest,S100a1,Vegfa
GO.0032268	regulation of cellular protein metabolic process	15	2.06e-05	ENSRNOP00000002837,ENSRNOP00000003077,ENSRNOP00000005995,ENSRNOP00000006188,ENSRNOP00000008722,ENSRNOP00000009179,ENSRNOP00000009402,ENSRNOP00000012137,ENSRNOP00000012588,ENSRNOP00000014785,ENSRNOP00000016942,ENSRNOP00000023628,ENSRNOP00000025064,ENSRNOP00000026637,ENSRNOP00000064356	Bdnf,Cav2,Dhcr24,Hspa4,Hspa5,Igf1,Itgb1,Kras,Myc,Pdgfra,Pparg,Ppia,Rest,Syk,Vegfa
GO.0001655	urogenital system development	7	2.11e-05	ENSRNOP00000003077,ENSRNOP00000006188,ENSRNOP00000019267,ENSRNOP00000022679,ENSRNOP00000023628,ENSRNOP00000026212,ENSRNOP00000064356	Bdnf,Hspa4,Igf1r,Mmp2,Myc,Notch1,Pdgfra
GO.0010629	negative regulation of gene expression	11	2.36e-05	ENSRNOP00000002837,ENSRNOP00000006188,ENSRNOP00000012137,ENSRNOP00000017000,ENSRNOP00000019192,ENSRNOP00000019267,ENSRNOP00000020528,ENSRNOP00000023628,ENSRNOP00000028793,ENSRNOP00000042230,ENSRNOP00000058593	Ctgf,Hif1a,Hmox1,Hspa4,Hspa8,Igf1r,Myc,Pparg,Rest,S100a1,Txnip
GO.0042325	regulation of phosphorylation	12	2.36e-05	ENSRNOP00000003077,ENSRNOP00000005995,ENSRNOP00000006188,ENSRNOP00000008722,ENSRNOP00000012588,ENSRNOP00000014785,ENSRNOP00000016942,ENSRNOP00000023628,ENSRNOP00000025064,ENSRNOP00000026637,ENSRNOP00000026760,ENSRNOP00000064356	Bdnf,Cav2,Hspa4,Hspa5,Igf1,Itgb1,Kras,Myc,Pdgfra,Stat3,Syk,Vegfa
GO.0071214	cellular response to abiotic stimulus	7	2.55e-05	ENSRNOP00000002837,ENSRNOP00000005311,ENSRNOP00000005995,ENSRNOP00000006188,ENSRNOP00000014785,ENSRNOP00000023256,ENSRNOP00000042230	Col1a1,Hif1a,Igf1,Itgb1,Myc,Rest,Slc2a4
GO.0007565	female pregnancy	7	2.67e-05	ENSRNOP00000005995,ENSRNOP00000014785,ENSRNOP00000019403,ENSRNOP00000022679,ENSRNOP00000024430,ENSRNOP00000026637,ENSRNOP00000042230	Hif1a,Igf1,Itgb1,Mmp2,Sp1,Vegfa,Vim
GO.0042493	response to drug	11	2.71e-05	ENSRNOP00000002837,ENSRNOP00000005311,ENSRNOP00000012137,ENSRNOP00000014785,ENSRNOP00000022679,ENSRNOP00000026637,ENSRNOP00000026760,ENSRNOP00000028793,ENSRNOP00000042230,ENSRNOP00000064356,ENSRNOP00000064368	Apod,Bdnf,Col1a1,Hif1a,Itgb1,Mmp2,Pparg,Rest,Stat3,Txnip,Vegfa
GO.0042542	response to hydrogen peroxide	6	2.82e-05	ENSRNOP00000005311,ENSRNOP00000011196,ENSRNOP00000019192,ENSRNOP00000022679,ENSRNOP00000028793,ENSRNOP00000042230	Col1a1,Hif1a,Hmox1,Mmp2,Olr1,Txnip
GO.0048608	reproductive structure development	8	2.95e-05	ENSRNOP00000003077,ENSRNOP00000009402,ENSRNOP00000012137,ENSRNOP00000019267,ENSRNOP00000019403,ENSRNOP00000022679,ENSRNOP00000024430,ENSRNOP00000026212	Dhcr24,Igf1r,Mmp2,Notch1,Pdgfra,Pparg,Sp1,Vim
GO.0055093	response to hyperoxia	5	2.95e-05	ENSRNOP00000003077,ENSRNOP00000005311,ENSRNOP00000012137,ENSRNOP00000022679,ENSRNOP00000064356	Bdnf,Col1a1,Mmp2,Pdgfra,Pparg
GO.0006355	regulation of transcription, DNA-templated	15	2.99e-05	ENSRNOP00000002837,ENSRNOP00000004232,ENSRNOP00000005311,ENSRNOP00000006188,ENSRNOP00000012137,ENSRNOP00000012588,ENSRNOP00000017000,ENSRNOP00000019192,ENSRNOP00000019267,ENSRNOP00000026637,ENSRNOP00000028793,ENSRNOP00000042230,ENSRNOP00000057733,ENSRNOP00000058593,ENSRNOP00000064356	Bdnf,Col1a1,Hif1a,Hmox1,Hspa8,Igf1r,Kras,Myc,Parp1,Pparg,Rest,Runx2,S100a1,Txnip,Vegfa
GO.0060627	regulation of vesicle-mediated transport	8	2.99e-05	ENSRNOP00000002837,ENSRNOP00000012137,ENSRNOP00000014785,ENSRNOP00000016942,ENSRNOP00000019192,ENSRNOP00000026212,ENSRNOP00000027773,ENSRNOP00000060874	Actn4,Hmox1,Itgb1,Notch1,Pparg,Rest,Scarb1,Syk
GO.0061458	reproductive system development	8	2.99e-05	ENSRNOP00000003077,ENSRNOP00000009402,ENSRNOP00000012137,ENSRNOP00000019267,ENSRNOP00000019403,ENSRNOP00000022679,ENSRNOP00000024430,ENSRNOP00000026212	Dhcr24,Igf1r,Mmp2,Notch1,Pdgfra,Pparg,Sp1,Vim
GO.0048699	generation of neurons	12	3.28e-05	ENSRNOP00000002837,ENSRNOP00000004956,ENSRNOP00000007788,ENSRNOP00000008972,ENSRNOP00000012137,ENSRNOP00000014785,ENSRNOP00000019267,ENSRNOP00000022679,ENSRNOP00000024430,ENSRNOP00000057733,ENSRNOP00000064368,ENSRNOP00000065381	Apod,Calu,Cntn4,Col3a1,Dcx,Igf1r,Itgb1,Mmp2,Pparg,Rest,Runx2,Vim
GO.0048878	chemical homeostasis	11	3.31e-05	ENSRNOP00000003077,ENSRNOP00000006188,ENSRNOP00000012137,ENSRNOP00000014785,ENSRNOP00000018877,ENSRNOP00000019192,ENSRNOP00000023256,ENSRNOP00000026760,ENSRNOP00000042230,ENSRNOP00000060874,ENSRNOP00000063604	Hif1a,Hmox1,Il6st,Itgb1,Myc,Pdgfra,Pparg,Scarb1,Slc17a7,Slc2a4,Stat3
GO.0006928	movement of cell or subcellular component	10	3.37e-05	ENSRNOP00000003077,ENSRNOP00000016942,ENSRNOP00000020528,ENSRNOP00000022679,ENSRNOP00000026212,ENSRNOP00000026637,ENSRNOP00000042230,ENSRNOP00000060874,ENSRNOP00000064356,ENSRNOP00000065381	Bdnf,Ctgf,Dcx,Hif1a,Mmp2,Notch1,Pdgfra,Scarb1,Syk,Vegfa
GO.0022414	reproductive process	12	3.37e-05	ENSRNOP00000003077,ENSRNOP00000005995,ENSRNOP00000009402,ENSRNOP00000012137,ENSRNOP00000014785,ENSRNOP00000019267,ENSRNOP00000019403,ENSRNOP00000022679,ENSRNOP00000024430,ENSRNOP00000026637,ENSRNOP00000026760,ENSRNOP00000042230	Dhcr24,Hif1a,Igf1,Igf1r,Itgb1,Mmp2,Pdgfra,Pparg,Sp1,Stat3,Vegfa,Vim
GO.0071702	organic substance transport	14	3.42e-05	ENSRNOP00000005311,ENSRNOP00000006188,ENSRNOP00000012137,ENSRNOP00000014785,ENSRNOP00000016942,ENSRNOP00000023256,ENSRNOP00000026212,ENSRNOP00000026760,ENSRNOP00000027773,ENSRNOP00000028793,ENSRNOP00000040699,ENSRNOP00000060874,ENSRNOP00000063604,ENSRNOP00000064356	Actn4,Bdnf,Col1a1,Itgb1,Myc,Notch1,Pparg,Scarb1,Slc17a7,Slc2a4,Stat3,Stx1a,Syk,Txnip
GO.0043066	negative regulation of apoptotic process	10	3.77e-05	ENSRNOP00000005995,ENSRNOP00000009402,ENSRNOP00000012588,ENSRNOP00000019267,ENSRNOP00000023628,ENSRNOP00000025064,ENSRNOP00000026212,ENSRNOP00000026760,ENSRNOP00000042230,ENSRNOP00000064356	Bdnf,Dhcr24,Hif1a,Hspa4,Hspa5,Igf1,Igf1r,Kras,Notch1,Stat3
GO.0042327	positive regulation of phosphorylation	10	4.04e-05	ENSRNOP00000003077,ENSRNOP00000005995,ENSRNOP00000006188,ENSRNOP00000008722,ENSRNOP00000012588,ENSRNOP00000014785,ENSRNOP00000019267,ENSRNOP00000025064,ENSRNOP00000026637,ENSRNOP00000064356	Bdnf,Cav2,Hspa5,Igf1,Igf1r,Itgb1,Kras,Myc,Pdgfra,Vegfa
GO.0035295	tube development	8	4.4e-05	ENSRNOP00000003077,ENSRNOP00000004956,ENSRNOP00000006188,ENSRNOP00000012588,ENSRNOP00000019403,ENSRNOP00000020528,ENSRNOP00000026637,ENSRNOP00000064356	Bdnf,Col3a1,Ctgf,Kras,Myc,Pdgfra,Sp1,Vegfa
GO.0043281	regulation of cysteine-type endopeptidase activity involved in apoptotic process	6	4.76e-05	ENSRNOP00000002837,ENSRNOP00000005995,ENSRNOP00000006188,ENSRNOP00000009402,ENSRNOP00000012137,ENSRNOP00000020528	Ctgf,Dhcr24,Igf1,Myc,Pparg,Rest
GO.0048583	regulation of response to stimulus	16	4.8e-05	ENSRNOP00000003077,ENSRNOP00000004232,ENSRNOP00000005311,ENSRNOP00000005995,ENSRNOP00000006188,ENSRNOP00000008722,ENSRNOP00000014785,ENSRNOP00000016942,ENSRNOP00000020528,ENSRNOP00000025064,ENSRNOP00000026637,ENSRNOP00000026760,ENSRNOP00000042230,ENSRNOP00000060874,ENSRNOP00000064356,ENSRNOP00000064368	Apod,Bdnf,Cav2,Col1a1,Ctgf,Hif1a,Hspa5,Igf1,Itgb1,Myc,Parp1,Pdgfra,Scarb1,Stat3,Syk,Vegfa
GO.0009314	response to radiation	8	4.82e-05	ENSRNOP00000004956,ENSRNOP00000006188,ENSRNOP00000012588,ENSRNOP00000014785,ENSRNOP00000022679,ENSRNOP00000024430,ENSRNOP00000042230,ENSRNOP00000064356	Bdnf,Col3a1,Hif1a,Itgb1,Kras,Mmp2,Myc,Vim
GO.0019216	regulation of lipid metabolic process	7	4.88e-05	ENSRNOP00000002837,ENSRNOP00000003077,ENSRNOP00000005995,ENSRNOP00000012137,ENSRNOP00000019267,ENSRNOP00000060874,ENSRNOP00000064368	Apod,Igf1,Igf1r,Pdgfra,Pparg,Rest,Scarb1
GO.0060512	prostate gland morphogenesis	3	4.97e-05	ENSRNOP00000019267,ENSRNOP00000022679,ENSRNOP00000026212	Igf1r,Mmp2,Notch1
GO.0060740	prostate gland epithelium morphogenesis	3	4.97e-05	ENSRNOP00000019267,ENSRNOP00000022679,ENSRNOP00000026212	Igf1r,Mmp2,Notch1
GO.0042692	muscle cell differentiation	6	5.54e-05	ENSRNOP00000002837,ENSRNOP00000003077,ENSRNOP00000008722,ENSRNOP00000012588,ENSRNOP00000024084,ENSRNOP00000026212	Acta1,Cav2,Kras,Notch1,Pdgfra,Rest
GO.0048646	anatomical structure formation involved in morphogenesis	9	5.9e-05	ENSRNOP00000003077,ENSRNOP00000005311,ENSRNOP00000016942,ENSRNOP00000019192,ENSRNOP00000019403,ENSRNOP00000020528,ENSRNOP00000022679,ENSRNOP00000024084,ENSRNOP00000026637	Acta1,Col1a1,Ctgf,Hmox1,Mmp2,Pdgfra,Sp1,Syk,Vegfa
GO.0061061	muscle structure development	7	6.45e-05	ENSRNOP00000002837,ENSRNOP00000003077,ENSRNOP00000004956,ENSRNOP00000008722,ENSRNOP00000012588,ENSRNOP00000024084,ENSRNOP00000026212	Acta1,Cav2,Col3a1,Kras,Notch1,Pdgfra,Rest
GO.0031667	response to nutrient levels	10	7.37e-05	ENSRNOP00000005311,ENSRNOP00000005995,ENSRNOP00000014785,ENSRNOP00000018877,ENSRNOP00000019192,ENSRNOP00000019267,ENSRNOP00000024430,ENSRNOP00000025064,ENSRNOP00000026637,ENSRNOP00000064356	Bdnf,Col1a1,Hmox1,Hspa5,Igf1,Igf1r,Il6st,Itgb1,Vegfa,Vim
GO.0043434	response to peptide hormone	9	7.37e-05	ENSRNOP00000004232,ENSRNOP00000005311,ENSRNOP00000008722,ENSRNOP00000009233,ENSRNOP00000012137,ENSRNOP00000020528,ENSRNOP00000023256,ENSRNOP00000026760,ENSRNOP00000042230	Cav2,Col1a1,Ctgf,Hif1a,Insig1,Parp1,Pparg,Slc2a4,Stat3
GO.0045596	negative regulation of cell differentiation	8	7.37e-05	ENSRNOP00000002837,ENSRNOP00000004956,ENSRNOP00000006188,ENSRNOP00000007788,ENSRNOP00000012588,ENSRNOP00000014785,ENSRNOP00000026760,ENSRNOP00000064356	Bdnf,Cntn4,Col3a1,Itgb1,Kras,Myc,Rest,Stat3
GO.0009892	negative regulation of metabolic process	14	7.46e-05	ENSRNOP00000002837,ENSRNOP00000005995,ENSRNOP00000006188,ENSRNOP00000008972,ENSRNOP00000009179,ENSRNOP00000009402,ENSRNOP00000017000,ENSRNOP00000019192,ENSRNOP00000020528,ENSRNOP00000023628,ENSRNOP00000028793,ENSRNOP00000042230,ENSRNOP00000058593,ENSRNOP00000064368	Apod,Calu,Ctgf,Dhcr24,Hif1a,Hmox1,Hspa4,Hspa8,Igf1,Myc,Ppia,Rest,S100a1,Txnip
GO.0051240	positive regulation of multicellular organismal process	12	7.86e-05	ENSRNOP00000005311,ENSRNOP00000005995,ENSRNOP00000006188,ENSRNOP00000014785,ENSRNOP00000016942,ENSRNOP00000019192,ENSRNOP00000020528,ENSRNOP00000023628,ENSRNOP00000024430,ENSRNOP00000026637,ENSRNOP00000042230,ENSRNOP00000057733	Col1a1,Ctgf,Hif1a,Hmox1,Hspa4,Igf1,Itgb1,Myc,Runx2,Syk,Vegfa,Vim
GO.0010605	negative regulation of macromolecule metabolic process	13	7.89e-05	ENSRNOP00000002837,ENSRNOP00000005995,ENSRNOP00000006188,ENSRNOP00000009179,ENSRNOP00000009402,ENSRNOP00000017000,ENSRNOP00000019192,ENSRNOP00000020528,ENSRNOP00000023628,ENSRNOP00000028793,ENSRNOP00000042230,ENSRNOP00000058593,ENSRNOP00000064368	Apod,Ctgf,Dhcr24,Hif1a,Hmox1,Hspa4,Hspa8,Igf1,Myc,Ppia,Rest,S100a1,Txnip
GO.1901215	negative regulation of neuron death	6	9e-05	ENSRNOP00000005995,ENSRNOP00000012588,ENSRNOP00000019192,ENSRNOP00000026637,ENSRNOP00000026760,ENSRNOP00000064356	Bdnf,Hmox1,Igf1,Kras,Stat3,Vegfa
GO.0045892	negative regulation of transcription, DNA-templated	9	9.04e-05	ENSRNOP00000002837,ENSRNOP00000006188,ENSRNOP00000012137,ENSRNOP00000017000,ENSRNOP00000019192,ENSRNOP00000019267,ENSRNOP00000028793,ENSRNOP00000042230,ENSRNOP00000058593	Hif1a,Hmox1,Hspa8,Igf1r,Myc,Pparg,Rest,S100a1,Txnip
GO.0010810	regulation of cell-substrate adhesion	5	9.16e-05	ENSRNOP00000005311,ENSRNOP00000014785,ENSRNOP00000026212,ENSRNOP00000026637,ENSRNOP00000064368	Apod,Col1a1,Itgb1,Notch1,Vegfa
GO.0071375	cellular response to peptide hormone stimulus	7	9.28e-05	ENSRNOP00000004232,ENSRNOP00000008722,ENSRNOP00000009233,ENSRNOP00000012137,ENSRNOP00000023256,ENSRNOP00000026760,ENSRNOP00000042230	Cav2,Hif1a,Insig1,Parp1,Pparg,Slc2a4,Stat3
GO.0043588	skin development	5	0.000107	ENSRNOP00000004956,ENSRNOP00000005311,ENSRNOP00000009402,ENSRNOP00000026212,ENSRNOP00000028793	Col1a1,Col3a1,Dhcr24,Notch1,Txnip
GO.0016477	cell migration	8	0.000118	ENSRNOP00000003077,ENSRNOP00000016942,ENSRNOP00000020528,ENSRNOP00000022679,ENSRNOP00000026212,ENSRNOP00000026637,ENSRNOP00000060874,ENSRNOP00000065381	Ctgf,Dcx,Mmp2,Notch1,Pdgfra,Scarb1,Syk,Vegfa
GO.0040011	locomotion	9	0.000118	ENSRNOP00000003077,ENSRNOP00000016942,ENSRNOP00000020528,ENSRNOP00000022679,ENSRNOP00000026212,ENSRNOP00000026637,ENSRNOP00000060874,ENSRNOP00000064356,ENSRNOP00000065381	Bdnf,Ctgf,Dcx,Mmp2,Notch1,Pdgfra,Scarb1,Syk,Vegfa
GO.0032869	cellular response to insulin stimulus	6	0.000126	ENSRNOP00000004232,ENSRNOP00000008722,ENSRNOP00000009233,ENSRNOP00000012137,ENSRNOP00000023256,ENSRNOP00000042230	Cav2,Hif1a,Insig1,Parp1,Pparg,Slc2a4
GO.0007568	aging	8	0.000132	ENSRNOP00000004956,ENSRNOP00000020528,ENSRNOP00000022679,ENSRNOP00000024430,ENSRNOP00000026637,ENSRNOP00000026760,ENSRNOP00000040859,ENSRNOP00000064368	Apod,Canx,Col3a1,Ctgf,Mmp2,Stat3,Vegfa,Vim
GO.0036293	response to decreased oxygen levels	8	0.000132	ENSRNOP00000020528,ENSRNOP00000022679,ENSRNOP00000023256,ENSRNOP00000026212,ENSRNOP00000026637,ENSRNOP00000027773,ENSRNOP00000042230,ENSRNOP00000064356	Actn4,Bdnf,Ctgf,Hif1a,Mmp2,Notch1,Slc2a4,Vegfa
GO.0050768	negative regulation of neurogenesis	6	0.000132	ENSRNOP00000002837,ENSRNOP00000004956,ENSRNOP00000007788,ENSRNOP00000014785,ENSRNOP00000026760,ENSRNOP00000064356	Bdnf,Cntn4,Col3a1,Itgb1,Rest,Stat3
GO.1902533	positive regulation of intracellular signal transduction	9	0.000132	ENSRNOP00000003077,ENSRNOP00000004956,ENSRNOP00000005995,ENSRNOP00000008722,ENSRNOP00000014785,ENSRNOP00000019192,ENSRNOP00000019267,ENSRNOP00000020528,ENSRNOP00000026212	Cav2,Col3a1,Ctgf,Hmox1,Igf1,Igf1r,Itgb1,Notch1,Pdgfra
GO.0048729	tissue morphogenesis	7	0.000135	ENSRNOP00000004956,ENSRNOP00000006188,ENSRNOP00000012588,ENSRNOP00000019267,ENSRNOP00000022679,ENSRNOP00000024084,ENSRNOP00000026212	Acta1,Col3a1,Igf1r,Kras,Mmp2,Myc,Notch1
GO.0007229	integrin-mediated signaling pathway	4	0.000138	ENSRNOP00000004956,ENSRNOP00000014785,ENSRNOP00000016942,ENSRNOP00000020528	Col3a1,Ctgf,Itgb1,Syk
GO.0061564	axon development	6	0.00015	ENSRNOP00000008972,ENSRNOP00000019267,ENSRNOP00000022679,ENSRNOP00000026212,ENSRNOP00000064356,ENSRNOP00000064368	Apod,Bdnf,Calu,Igf1r,Mmp2,Notch1
GO.0009653	anatomical structure morphogenesis	12	0.000153	ENSRNOP00000003077,ENSRNOP00000004956,ENSRNOP00000006188,ENSRNOP00000012588,ENSRNOP00000016942,ENSRNOP00000019192,ENSRNOP00000019403,ENSRNOP00000022679,ENSRNOP00000024084,ENSRNOP00000025064,ENSRNOP00000026637,ENSRNOP00000026760	Acta1,Col3a1,Hmox1,Hspa5,Kras,Mmp2,Myc,Pdgfra,Sp1,Stat3,Syk,Vegfa
GO.0008152	metabolic process	29	0.000156	ENSRNOP00000002837,ENSRNOP00000003077,ENSRNOP00000004232,ENSRNOP00000004956,ENSRNOP00000005311,ENSRNOP00000006188,ENSRNOP00000008930,ENSRNOP00000009233,ENSRNOP00000011196,ENSRNOP00000016942,ENSRNOP00000018877,ENSRNOP00000019192,ENSRNOP00000019403,ENSRNOP00000020528,ENSRNOP00000023256,ENSRNOP00000025064,ENSRNOP00000026212,ENSRNOP00000026637,ENSRNOP00000027064,ENSRNOP00000028793,ENSRNOP00000040859,…	Apod,Bdnf,Canx,Capn8,Col1a1,Col3a1,Ctgf,Dcx,Gmppa,Grpel1,Hif1a,Hmox1,Hspa5,Hspa8,Il6st,Insig1,Myc,Notch1,Olr1,Parp1,Pdgfra,Rest,Runx2,Slc2a4,Sp1,Syk,Txnip,Ubb,Vegfa
GO.0060322	head development	9	0.000171	ENSRNOP00000004956,ENSRNOP00000005311,ENSRNOP00000006188,ENSRNOP00000007788,ENSRNOP00000017000,ENSRNOP00000019267,ENSRNOP00000025064,ENSRNOP00000063604,ENSRNOP00000064368	Apod,Cntn4,Col1a1,Col3a1,Hspa5,Igf1r,Myc,S100a1,Slc17a7
GO.0001934	positive regulation of protein phosphorylation	9	0.000173	ENSRNOP00000003077,ENSRNOP00000005995,ENSRNOP00000008722,ENSRNOP00000012588,ENSRNOP00000014785,ENSRNOP00000019267,ENSRNOP00000025064,ENSRNOP00000026637,ENSRNOP00000064356	Bdnf,Cav2,Hspa5,Igf1,Igf1r,Itgb1,Kras,Pdgfra,Vegfa
GO.0071257	cellular response to electrical stimulus	3	0.000173	ENSRNOP00000002837,ENSRNOP00000005995,ENSRNOP00000042230	Hif1a,Igf1,Rest
GO.0010628	positive regulation of gene expression	11	0.000175	ENSRNOP00000004232,ENSRNOP00000005311,ENSRNOP00000006188,ENSRNOP00000012137,ENSRNOP00000012588,ENSRNOP00000020528,ENSRNOP00000023628,ENSRNOP00000024084,ENSRNOP00000026637,ENSRNOP00000042230,ENSRNOP00000064356	Acta1,Bdnf,Col1a1,Ctgf,Hif1a,Hspa4,Kras,Myc,Parp1,Pparg,Vegfa
GO.0071396	cellular response to lipid	8	0.000177	ENSRNOP00000002837,ENSRNOP00000005311,ENSRNOP00000006188,ENSRNOP00000014785,ENSRNOP00000022679,ENSRNOP00000026637,ENSRNOP00000042230,ENSRNOP00000060874	Col1a1,Hif1a,Itgb1,Mmp2,Myc,Rest,Scarb1,Vegfa
GO.0014823	response to activity	5	0.000182	ENSRNOP00000005995,ENSRNOP00000014785,ENSRNOP00000022679,ENSRNOP00000042230,ENSRNOP00000064356	Bdnf,Hif1a,Igf1,Itgb1,Mmp2
GO.0048468	cell development	11	0.000187	ENSRNOP00000003077,ENSRNOP00000007788,ENSRNOP00000008722,ENSRNOP00000008972,ENSRNOP00000012137,ENSRNOP00000019267,ENSRNOP00000022679,ENSRNOP00000024084,ENSRNOP00000026212,ENSRNOP00000026760,ENSRNOP00000064368	Acta1,Apod,Calu,Cav2,Cntn4,Igf1r,Mmp2,Notch1,Pdgfra,Pparg,Stat3
GO.1901362	organic cyclic compound biosynthetic process	14	0.000205	ENSRNOP00000002837,ENSRNOP00000004232,ENSRNOP00000006188,ENSRNOP00000009402,ENSRNOP00000012137,ENSRNOP00000019403,ENSRNOP00000020528,ENSRNOP00000026212,ENSRNOP00000026760,ENSRNOP00000028793,ENSRNOP00000042230,ENSRNOP00000057733,ENSRNOP00000058593,ENSRNOP00000060874	Ctgf,Dhcr24,Hif1a,Hspa8,Myc,Notch1,Parp1,Pparg,Rest,Runx2,Scarb1,Sp1,Stat3,Txnip
GO.0002683	negative regulation of immune system process	6	0.000209	ENSRNOP00000004956,ENSRNOP00000006188,ENSRNOP00000012137,ENSRNOP00000019192,ENSRNOP00000026212,ENSRNOP00000064368	Apod,Col3a1,Hmox1,Myc,Notch1,Pparg
GO.0044699	single-organism process	32	0.00022	ENSRNOP00000002837,ENSRNOP00000003077,ENSRNOP00000004232,ENSRNOP00000005995,ENSRNOP00000006188,ENSRNOP00000006238,ENSRNOP00000006426,ENSRNOP00000007788,ENSRNOP00000008722,ENSRNOP00000008972,ENSRNOP00000009233,ENSRNOP00000010491,ENSRNOP00000011196,ENSRNOP00000014785,ENSRNOP00000016942,ENSRNOP00000017000,ENSRNOP00000018877,ENSRNOP00000019192,ENSRNOP00000019403,ENSRNOP00000022679,ENSRNOP00000023628,…	Acta1,Apod,Calm1,Calu,Canx,Capn8,Cav2,Cntn4,Dcx,Hmox1,Hspa4,Igf1,Il6st,Insig1,Itgb1,Kcnj16,Mmp2,Myc,Olr1,Parp1,Pdgfra,Rest,Runx2,S100a1,Scarb1,Sept3,Sp1,Syk,Txnip,Vegfa,Vim,Wif1
GO.0051674	localization of cell	8	0.00022	ENSRNOP00000003077,ENSRNOP00000016942,ENSRNOP00000020528,ENSRNOP00000022679,ENSRNOP00000026212,ENSRNOP00000026637,ENSRNOP00000060874,ENSRNOP00000065381	Ctgf,Dcx,Mmp2,Notch1,Pdgfra,Scarb1,Syk,Vegfa
GO.0014012	peripheral nervous system axon regeneration	3	0.000232	ENSRNOP00000008972,ENSRNOP00000022679,ENSRNOP00000064368	Apod,Calu,Mmp2
GO.0044238	primary metabolic process	26	0.000232	ENSRNOP00000002837,ENSRNOP00000003077,ENSRNOP00000004232,ENSRNOP00000004956,ENSRNOP00000006188,ENSRNOP00000008930,ENSRNOP00000009233,ENSRNOP00000011196,ENSRNOP00000016942,ENSRNOP00000018877,ENSRNOP00000019192,ENSRNOP00000019403,ENSRNOP00000020528,ENSRNOP00000025064,ENSRNOP00000026212,ENSRNOP00000026760,ENSRNOP00000028793,ENSRNOP00000040859,ENSRNOP00000042230,ENSRNOP00000043934,ENSRNOP00000057733,…	Apod,Bdnf,Canx,Capn8,Col3a1,Ctgf,Dcx,Grpel1,Hif1a,Hmox1,Hspa5,Hspa8,Il6st,Insig1,Myc,Notch1,Olr1,Parp1,Pdgfra,Rest,Runx2,Sp1,Stat3,Syk,Txnip,Ubb
GO.0090030	regulation of steroid hormone biosynthetic process	3	0.000232	ENSRNOP00000002837,ENSRNOP00000005995,ENSRNOP00000019267	Igf1,Igf1r,Rest
GO.0030155	regulation of cell adhesion	7	0.000247	ENSRNOP00000005311,ENSRNOP00000014785,ENSRNOP00000016942,ENSRNOP00000022679,ENSRNOP00000026212,ENSRNOP00000026637,ENSRNOP00000064368	Apod,Col1a1,Itgb1,Mmp2,Notch1,Syk,Vegfa
GO.0045935	positive regulation of nucleobase-containing compound metabolic process	11	0.000251	ENSRNOP00000003077,ENSRNOP00000004232,ENSRNOP00000005311,ENSRNOP00000006188,ENSRNOP00000012137,ENSRNOP00000012588,ENSRNOP00000025064,ENSRNOP00000026637,ENSRNOP00000042230,ENSRNOP00000063822,ENSRNOP00000064356	Bdnf,Calm1,Col1a1,Hif1a,Hspa5,Kras,Myc,Parp1,Pdgfra,Pparg,Vegfa
GO.0071407	cellular response to organic cyclic compound	8	0.000256	ENSRNOP00000002837,ENSRNOP00000005311,ENSRNOP00000006188,ENSRNOP00000014785,ENSRNOP00000022679,ENSRNOP00000026637,ENSRNOP00000042230,ENSRNOP00000064356	Bdnf,Col1a1,Hif1a,Itgb1,Mmp2,Myc,Rest,Vegfa
GO.0035556	intracellular signal transduction	11	0.000257	ENSRNOP00000003077,ENSRNOP00000006188,ENSRNOP00000009402,ENSRNOP00000012588,ENSRNOP00000016942,ENSRNOP00000019192,ENSRNOP00000019267,ENSRNOP00000020528,ENSRNOP00000026760,ENSRNOP00000063822,ENSRNOP00000065381	Calm1,Ctgf,Dcx,Dhcr24,Hmox1,Igf1r,Kras,Myc,Pdgfra,Stat3,Syk
GO.0031670	cellular response to nutrient	4	0.000271	ENSRNOP00000005311,ENSRNOP00000012137,ENSRNOP00000014785,ENSRNOP00000019192	Col1a1,Hmox1,Itgb1,Pparg
GO.2000736	regulation of stem cell differentiation	4	0.000271	ENSRNOP00000002837,ENSRNOP00000003077,ENSRNOP00000005311,ENSRNOP00000026212	Col1a1,Notch1,Pdgfra,Rest
GO.0010038	response to metal ion	8	0.00031	ENSRNOP00000012137,ENSRNOP00000019192,ENSRNOP00000024084,ENSRNOP00000024430,ENSRNOP00000025064,ENSRNOP00000028793,ENSRNOP00000042230,ENSRNOP00000064356	Acta1,Bdnf,Hif1a,Hmox1,Hspa5,Pparg,Txnip,Vim
GO.0031399	regulation of protein modification process	11	0.000315	ENSRNOP00000003077,ENSRNOP00000005995,ENSRNOP00000008722,ENSRNOP00000009179,ENSRNOP00000012588,ENSRNOP00000014785,ENSRNOP00000016942,ENSRNOP00000023628,ENSRNOP00000025064,ENSRNOP00000026637,ENSRNOP00000064356	Bdnf,Cav2,Hspa4,Hspa5,Igf1,Itgb1,Kras,Pdgfra,Ppia,Syk,Vegfa
GO.0043085	positive regulation of catalytic activity	10	0.000351	ENSRNOP00000002837,ENSRNOP00000003077,ENSRNOP00000005995,ENSRNOP00000006188,ENSRNOP00000012137,ENSRNOP00000012588,ENSRNOP00000020528,ENSRNOP00000025064,ENSRNOP00000060874,ENSRNOP00000063822	Calm1,Ctgf,Hspa5,Igf1,Kras,Myc,Pdgfra,Pparg,Rest,Scarb1
GO.0001501	skeletal system development	6	0.000361	ENSRNOP00000003077,ENSRNOP00000004956,ENSRNOP00000005311,ENSRNOP00000019403,ENSRNOP00000020528,ENSRNOP00000057733	Col1a1,Col3a1,Ctgf,Pdgfra,Runx2,Sp1
GO.0001932	regulation of protein phosphorylation	10	0.000374	ENSRNOP00000003077,ENSRNOP00000005995,ENSRNOP00000008722,ENSRNOP00000012588,ENSRNOP00000014785,ENSRNOP00000016942,ENSRNOP00000023628,ENSRNOP00000025064,ENSRNOP00000026637,ENSRNOP00000064356	Bdnf,Cav2,Hspa4,Hspa5,Igf1,Itgb1,Kras,Pdgfra,Syk,Vegfa
GO.0045834	positive regulation of lipid metabolic process	5	0.000394	ENSRNOP00000003077,ENSRNOP00000005995,ENSRNOP00000012137,ENSRNOP00000019267,ENSRNOP00000060874	Igf1,Igf1r,Pdgfra,Pparg,Scarb1
GO.0071453	cellular response to oxygen levels	5	0.000394	ENSRNOP00000012137,ENSRNOP00000019192,ENSRNOP00000023256,ENSRNOP00000026212,ENSRNOP00000042230	Hif1a,Hmox1,Notch1,Pparg,Slc2a4
GO.0051000	positive regulation of nitric-oxide synthase activity	3	0.000397	ENSRNOP00000012588,ENSRNOP00000060874,ENSRNOP00000063822	Calm1,Kras,Scarb1
GO.0006357	regulation of transcription from RNA polymerase II promoter	10	0.000415	ENSRNOP00000002837,ENSRNOP00000004232,ENSRNOP00000006188,ENSRNOP00000012137,ENSRNOP00000017000,ENSRNOP00000019192,ENSRNOP00000026637,ENSRNOP00000028793,ENSRNOP00000042230,ENSRNOP00000057733	Hif1a,Hmox1,Myc,Parp1,Pparg,Rest,Runx2,S100a1,Txnip,Vegfa
GO.0045934	negative regulation of nucleobase-containing compound metabolic process	9	0.000427	ENSRNOP00000002837,ENSRNOP00000006188,ENSRNOP00000017000,ENSRNOP00000019192,ENSRNOP00000019267,ENSRNOP00000026760,ENSRNOP00000028793,ENSRNOP00000042230,ENSRNOP00000058593	Hif1a,Hmox1,Hspa8,Igf1r,Myc,Rest,S100a1,Stat3,Txnip
GO.0031324	negative regulation of cellular metabolic process	12	0.000429	ENSRNOP00000002837,ENSRNOP00000005995,ENSRNOP00000006188,ENSRNOP00000009179,ENSRNOP00000009402,ENSRNOP00000017000,ENSRNOP00000019192,ENSRNOP00000023628,ENSRNOP00000028793,ENSRNOP00000042230,ENSRNOP00000058593,ENSRNOP00000064368	Apod,Dhcr24,Hif1a,Hmox1,Hspa4,Hspa8,Igf1,Myc,Ppia,Rest,S100a1,Txnip
GO.0060249	anatomical structure homeostasis	5	0.000436	ENSRNOP00000004232,ENSRNOP00000012588,ENSRNOP00000014785,ENSRNOP00000020528,ENSRNOP00000063604	Ctgf,Itgb1,Kras,Parp1,Slc17a7
GO.0044703	multi-organism reproductive process	9	0.000496	ENSRNOP00000005995,ENSRNOP00000014785,ENSRNOP00000019403,ENSRNOP00000022679,ENSRNOP00000024430,ENSRNOP00000026212,ENSRNOP00000026637,ENSRNOP00000026760,ENSRNOP00000042230	Hif1a,Igf1,Itgb1,Mmp2,Notch1,Sp1,Stat3,Vegfa,Vim
GO.0045920	negative regulation of exocytosis	3	0.000496	ENSRNOP00000002837,ENSRNOP00000019192,ENSRNOP00000026212	Hmox1,Notch1,Rest
GO.0002376	immune system process	10	0.000499	ENSRNOP00000011196,ENSRNOP00000012137,ENSRNOP00000016942,ENSRNOP00000019192,ENSRNOP00000019267,ENSRNOP00000019403,ENSRNOP00000026212,ENSRNOP00000026637,ENSRNOP00000057733,ENSRNOP00000060874	Hmox1,Igf1r,Notch1,Olr1,Pparg,Runx2,Scarb1,Sp1,Syk,Vegfa
GO.0060429	epithelium development	8	0.000506	ENSRNOP00000006188,ENSRNOP00000012137,ENSRNOP00000012588,ENSRNOP00000019267,ENSRNOP00000022679,ENSRNOP00000026212,ENSRNOP00000028793,ENSRNOP00000064356	Bdnf,Igf1r,Kras,Mmp2,Myc,Notch1,Pparg,Txnip
GO.0061419	positive regulation of transcription from RNA polymerase II promoter in response to hypoxia	2	0.000521	ENSRNOP00000026212,ENSRNOP00000042230	Hif1a,Notch1
GO.2000739	regulation of mesenchymal stem cell differentiation	2	0.000521	ENSRNOP00000002837,ENSRNOP00000003077	Pdgfra,Rest
GO.0051271	negative regulation of cellular component movement	5	0.000529	ENSRNOP00000004956,ENSRNOP00000026212,ENSRNOP00000026760,ENSRNOP00000027773,ENSRNOP00000064368	Actn4,Apod,Col3a1,Notch1,Stat3
GO.0031099	regeneration	6	0.000543	ENSRNOP00000008972,ENSRNOP00000012137,ENSRNOP00000022679,ENSRNOP00000024430,ENSRNOP00000026212,ENSRNOP00000064368	Apod,Calu,Mmp2,Notch1,Pparg,Vim
GO.0030324	lung development	5	0.000618	ENSRNOP00000012588,ENSRNOP00000019403,ENSRNOP00000020528,ENSRNOP00000026212,ENSRNOP00000026637	Ctgf,Kras,Notch1,Sp1,Vegfa
GO.0071216	cellular response to biotic stimulus	5	0.000618	ENSRNOP00000016942,ENSRNOP00000025064,ENSRNOP00000028793,ENSRNOP00000042230,ENSRNOP00000060874	Hif1a,Hspa5,Scarb1,Syk,Txnip
GO.0030323	respiratory tube development	5	0.000651	ENSRNOP00000012588,ENSRNOP00000019403,ENSRNOP00000020528,ENSRNOP00000026212,ENSRNOP00000026637	Ctgf,Kras,Notch1,Sp1,Vegfa
GO.0044092	negative regulation of molecular function	9	0.00066	ENSRNOP00000005995,ENSRNOP00000008972,ENSRNOP00000009179,ENSRNOP00000009402,ENSRNOP00000012137,ENSRNOP00000019192,ENSRNOP00000023628,ENSRNOP00000026212,ENSRNOP00000028793	Calu,Dhcr24,Hmox1,Hspa4,Igf1,Notch1,Pparg,Ppia,Txnip
GO.1902578	single-organism localization	16	0.000662	ENSRNOP00000002837,ENSRNOP00000006188,ENSRNOP00000006238,ENSRNOP00000012137,ENSRNOP00000014785,ENSRNOP00000016942,ENSRNOP00000020528,ENSRNOP00000023256,ENSRNOP00000025064,ENSRNOP00000026212,ENSRNOP00000026760,ENSRNOP00000028793,ENSRNOP00000040859,ENSRNOP00000042230,ENSRNOP00000060874,ENSRNOP00000064356	Bdnf,Canx,Ctgf,Hif1a,Hspa5,Itgb1,Kcnj16,Myc,Notch1,Pparg,Rest,Scarb1,Slc2a4,Stat3,Syk,Txnip
GO.0031327	negative regulation of cellular biosynthetic process	9	0.000667	ENSRNOP00000002837,ENSRNOP00000006188,ENSRNOP00000017000,ENSRNOP00000019192,ENSRNOP00000019267,ENSRNOP00000026760,ENSRNOP00000028793,ENSRNOP00000042230,ENSRNOP00000058593	Hif1a,Hmox1,Hspa8,Igf1r,Myc,Rest,S100a1,Stat3,Txnip
GO.0030100	regulation of endocytosis	5	0.000676	ENSRNOP00000012137,ENSRNOP00000014785,ENSRNOP00000016942,ENSRNOP00000027773,ENSRNOP00000060874	Actn4,Itgb1,Pparg,Scarb1,Syk
GO.0009059	macromolecule biosynthetic process	14	0.000684	ENSRNOP00000002837,ENSRNOP00000004232,ENSRNOP00000005311,ENSRNOP00000006188,ENSRNOP00000012137,ENSRNOP00000019403,ENSRNOP00000020528,ENSRNOP00000023256,ENSRNOP00000026212,ENSRNOP00000026760,ENSRNOP00000028793,ENSRNOP00000042230,ENSRNOP00000057733,ENSRNOP00000058593	Col1a1,Ctgf,Hif1a,Hspa8,Myc,Notch1,Parp1,Pparg,Rest,Runx2,Slc2a4,Sp1,Stat3,Txnip
GO.0008219	cell death	9	0.000695	ENSRNOP00000002837,ENSRNOP00000005995,ENSRNOP00000006188,ENSRNOP00000009402,ENSRNOP00000011196,ENSRNOP00000012137,ENSRNOP00000019192,ENSRNOP00000020528,ENSRNOP00000026212	Ctgf,Dhcr24,Hmox1,Igf1,Myc,Notch1,Olr1,Pparg,Rest
GO.0010812	negative regulation of cell-substrate adhesion	3	0.00073	ENSRNOP00000005311,ENSRNOP00000026212,ENSRNOP00000064368	Apod,Col1a1,Notch1
GO.0030850	prostate gland development	3	0.00073	ENSRNOP00000019267,ENSRNOP00000022679,ENSRNOP00000026212	Igf1r,Mmp2,Notch1
GO.0007417	central nervous system development	9	0.000737	ENSRNOP00000004956,ENSRNOP00000006188,ENSRNOP00000007788,ENSRNOP00000017000,ENSRNOP00000019267,ENSRNOP00000025064,ENSRNOP00000026760,ENSRNOP00000063604,ENSRNOP00000064368	Apod,Cntn4,Col3a1,Hspa5,Igf1r,Myc,S100a1,Slc17a7,Stat3
GO.0002682	regulation of immune system process	8	0.000769	ENSRNOP00000004956,ENSRNOP00000006188,ENSRNOP00000012137,ENSRNOP00000016942,ENSRNOP00000019192,ENSRNOP00000026212,ENSRNOP00000060874,ENSRNOP00000064368	Apod,Col3a1,Hmox1,Myc,Notch1,Pparg,Scarb1,Syk
GO.1902589	single-organism organelle organization	11	0.000781	ENSRNOP00000002837,ENSRNOP00000003077,ENSRNOP00000004232,ENSRNOP00000006188,ENSRNOP00000008722,ENSRNOP00000012588,ENSRNOP00000024084,ENSRNOP00000026760,ENSRNOP00000027773,ENSRNOP00000040699,ENSRNOP00000063604	Acta1,Actn4,Cav2,Kras,Myc,Parp1,Pdgfra,Rest,Slc17a7,Stat3,Stx1a
GO.0043200	response to amino acid	5	0.0008	ENSRNOP00000004956,ENSRNOP00000005311,ENSRNOP00000020528,ENSRNOP00000026637,ENSRNOP00000064356	Bdnf,Col1a1,Col3a1,Ctgf,Vegfa
GO.0051130	positive regulation of cellular component organization	9	0.000807	ENSRNOP00000005311,ENSRNOP00000012137,ENSRNOP00000014785,ENSRNOP00000019267,ENSRNOP00000020528,ENSRNOP00000026212,ENSRNOP00000026637,ENSRNOP00000027773,ENSRNOP00000064356	Actn4,Bdnf,Col1a1,Ctgf,Igf1r,Itgb1,Notch1,Pparg,Vegfa
GO.0009058	biosynthetic process	17	0.000832	ENSRNOP00000002837,ENSRNOP00000004232,ENSRNOP00000005311,ENSRNOP00000006188,ENSRNOP00000009402,ENSRNOP00000012137,ENSRNOP00000019403,ENSRNOP00000020528,ENSRNOP00000023256,ENSRNOP00000026212,ENSRNOP00000026760,ENSRNOP00000027064,ENSRNOP00000028793,ENSRNOP00000042230,ENSRNOP00000057733,ENSRNOP00000058593,ENSRNOP00000060874	Col1a1,Ctgf,Dhcr24,Gmppa,Hif1a,Hspa8,Myc,Notch1,Parp1,Pparg,Rest,Runx2,Scarb1,Slc2a4,Sp1,Stat3,Txnip
GO.0043086	negative regulation of catalytic activity	8	0.000838	ENSRNOP00000005995,ENSRNOP00000008972,ENSRNOP00000009179,ENSRNOP00000009402,ENSRNOP00000012137,ENSRNOP00000019267,ENSRNOP00000026212,ENSRNOP00000028793	Calu,Dhcr24,Igf1,Igf1r,Notch1,Pparg,Ppia,Txnip
GO.0007507	heart development	6	0.000859	ENSRNOP00000002837,ENSRNOP00000003077,ENSRNOP00000004956,ENSRNOP00000012137,ENSRNOP00000022679,ENSRNOP00000026637	Col3a1,Mmp2,Pdgfra,Pparg,Rest,Vegfa
GO.0043618	regulation of transcription from RNA polymerase II promoter in response to stress	3	0.000859	ENSRNOP00000019192,ENSRNOP00000026212,ENSRNOP00000042230	Hif1a,Hmox1,Notch1
GO.0060541	respiratory system development	5	0.00086	ENSRNOP00000012588,ENSRNOP00000019403,ENSRNOP00000020528,ENSRNOP00000026212,ENSRNOP00000026637	Ctgf,Kras,Notch1,Sp1,Vegfa
GO.0001666	response to hypoxia	7	0.000875	ENSRNOP00000022679,ENSRNOP00000023256,ENSRNOP00000026212,ENSRNOP00000026637,ENSRNOP00000027773,ENSRNOP00000042230,ENSRNOP00000064356	Actn4,Bdnf,Hif1a,Mmp2,Notch1,Slc2a4,Vegfa
GO.0007420	brain development	8	0.000875	ENSRNOP00000004956,ENSRNOP00000006188,ENSRNOP00000007788,ENSRNOP00000017000,ENSRNOP00000019267,ENSRNOP00000025064,ENSRNOP00000063604,ENSRNOP00000064368	Apod,Cntn4,Col3a1,Hspa5,Igf1r,Myc,S100a1,Slc17a7
GO.0044260	cellular macromolecule metabolic process	20	0.000899	ENSRNOP00000002837,ENSRNOP00000003077,ENSRNOP00000004232,ENSRNOP00000004956,ENSRNOP00000006188,ENSRNOP00000008930,ENSRNOP00000012137,ENSRNOP00000016942,ENSRNOP00000019403,ENSRNOP00000020528,ENSRNOP00000025064,ENSRNOP00000026212,ENSRNOP00000026760,ENSRNOP00000028793,ENSRNOP00000040859,ENSRNOP00000042230,ENSRNOP00000043934,ENSRNOP00000057733,ENSRNOP00000058593,ENSRNOP00000065381	Canx,Col3a1,Ctgf,Dcx,Grpel1,Hif1a,Hspa5,Hspa8,Myc,Notch1,Parp1,Pdgfra,Pparg,Rest,Runx2,Sp1,Stat3,Syk,Txnip,Ubb
GO.0060537	muscle tissue development	5	0.000937	ENSRNOP00000003077,ENSRNOP00000004956,ENSRNOP00000008722,ENSRNOP00000024084,ENSRNOP00000026212	Acta1,Cav2,Col3a1,Notch1,Pdgfra
GO.0043065	positive regulation of apoptotic process	7	0.00103	ENSRNOP00000002837,ENSRNOP00000006188,ENSRNOP00000020528,ENSRNOP00000022679,ENSRNOP00000026212,ENSRNOP00000028793,ENSRNOP00000042230	Ctgf,Hif1a,Mmp2,Myc,Notch1,Rest,Txnip
GO.0044403	symbiosis, encompassing mutualism through parasitism	4	0.00103	ENSRNOP00000002837,ENSRNOP00000006188,ENSRNOP00000019403,ENSRNOP00000060874	Myc,Rest,Scarb1,Sp1
GO.0006351	transcription, DNA-templated	11	0.00111	ENSRNOP00000002837,ENSRNOP00000004232,ENSRNOP00000006188,ENSRNOP00000012137,ENSRNOP00000019403,ENSRNOP00000026212,ENSRNOP00000026760,ENSRNOP00000028793,ENSRNOP00000042230,ENSRNOP00000057733,ENSRNOP00000058593	Hif1a,Hspa8,Myc,Notch1,Parp1,Pparg,Rest,Runx2,Sp1,Stat3,Txnip
GO.0043280	positive regulation of cysteine-type endopeptidase activity involved in apoptotic process	4	0.00111	ENSRNOP00000002837,ENSRNOP00000006188,ENSRNOP00000012137,ENSRNOP00000020528	Ctgf,Myc,Pparg,Rest
GO.0019538	protein metabolic process	16	0.00112	ENSRNOP00000002837,ENSRNOP00000003077,ENSRNOP00000004232,ENSRNOP00000004956,ENSRNOP00000006188,ENSRNOP00000008930,ENSRNOP00000009402,ENSRNOP00000011196,ENSRNOP00000012137,ENSRNOP00000016942,ENSRNOP00000025064,ENSRNOP00000040859,ENSRNOP00000043934,ENSRNOP00000058593,ENSRNOP00000062898,ENSRNOP00000065381	Canx,Capn8,Col3a1,Dcx,Dhcr24,Grpel1,Hspa5,Hspa8,Myc,Olr1,Parp1,Pdgfra,Pparg,Rest,Syk,Ubb
GO.0007423	sensory organ development	6	0.00113	ENSRNOP00000003077,ENSRNOP00000019403,ENSRNOP00000026212,ENSRNOP00000026760,ENSRNOP00000063604,ENSRNOP00000064356	Bdnf,Notch1,Pdgfra,Slc17a7,Sp1,Stat3
GO.0034654	nucleobase-containing compound biosynthetic process	12	0.00114	ENSRNOP00000002837,ENSRNOP00000004232,ENSRNOP00000006188,ENSRNOP00000012137,ENSRNOP00000019403,ENSRNOP00000020528,ENSRNOP00000026212,ENSRNOP00000026760,ENSRNOP00000028793,ENSRNOP00000042230,ENSRNOP00000057733,ENSRNOP00000058593	Ctgf,Hif1a,Hspa8,Myc,Notch1,Parp1,Pparg,Rest,Runx2,Sp1,Stat3,Txnip
GO.0040008	regulation of growth	7	0.00117	ENSRNOP00000004232,ENSRNOP00000005995,ENSRNOP00000012137,ENSRNOP00000020528,ENSRNOP00000026212,ENSRNOP00000026760,ENSRNOP00000064356	Bdnf,Ctgf,Igf1,Notch1,Parp1,Pparg,Stat3
GO.0008150	biological_process	33	0.00122	ENSRNOP00000002837,ENSRNOP00000003077,ENSRNOP00000004232,ENSRNOP00000005995,ENSRNOP00000006188,ENSRNOP00000006238,ENSRNOP00000006426,ENSRNOP00000007788,ENSRNOP00000008722,ENSRNOP00000008930,ENSRNOP00000008972,ENSRNOP00000009233,ENSRNOP00000010491,ENSRNOP00000011196,ENSRNOP00000012137,ENSRNOP00000016942,ENSRNOP00000018877,ENSRNOP00000019192,ENSRNOP00000019267,ENSRNOP00000023628,ENSRNOP00000024084,…	Acta1,Calm1,Calu,Canx,Capn8,Cav2,Cntn4,Dcx,Gmppa,Grpel1,Hif1a,Hmox1,Hspa4,Hspa8,Igf1,Igf1r,Il6st,Insig1,Kcnj16,Myc,Olr1,Parp1,Pdgfra,Pparg,Rest,Runx2,Scarb1,Sept3,Syk,Ubb,Vegfa,Vim,Wif1
GO.0030182	neuron differentiation	8	0.00123	ENSRNOP00000007788,ENSRNOP00000008972,ENSRNOP00000019267,ENSRNOP00000022679,ENSRNOP00000026212,ENSRNOP00000026760,ENSRNOP00000057733,ENSRNOP00000064368	Apod,Calu,Cntn4,Igf1r,Mmp2,Notch1,Runx2,Stat3
GO.0045597	positive regulation of cell differentiation	8	0.00123	ENSRNOP00000005311,ENSRNOP00000005995,ENSRNOP00000006426,ENSRNOP00000012137,ENSRNOP00000014785,ENSRNOP00000016942,ENSRNOP00000020528,ENSRNOP00000024430	Col1a1,Ctgf,Igf1,Itgb1,Pparg,Syk,Vim,Wif1
GO.0044765	single-organism transport	15	0.00124	ENSRNOP00000002837,ENSRNOP00000006188,ENSRNOP00000006238,ENSRNOP00000012137,ENSRNOP00000014785,ENSRNOP00000016942,ENSRNOP00000020528,ENSRNOP00000023256,ENSRNOP00000026212,ENSRNOP00000026760,ENSRNOP00000028793,ENSRNOP00000040859,ENSRNOP00000042230,ENSRNOP00000060874,ENSRNOP00000064356	Bdnf,Canx,Ctgf,Hif1a,Itgb1,Kcnj16,Myc,Notch1,Pparg,Rest,Scarb1,Slc2a4,Stat3,Syk,Txnip
GO.0035357	peroxisome proliferator activated receptor signaling pathway	2	0.00128	ENSRNOP00000012137,ENSRNOP00000027773	Actn4,Pparg
GO.0072347	response to anesthetic	2	0.00128	ENSRNOP00000042230,ENSRNOP00000064356	Bdnf,Hif1a
GO.2001171	positive regulation of ATP biosynthetic process	2	0.00128	ENSRNOP00000006188,ENSRNOP00000026760	Myc,Stat3
GO.0001822	kidney development	5	0.00141	ENSRNOP00000003077,ENSRNOP00000006188,ENSRNOP00000023628,ENSRNOP00000026212,ENSRNOP00000064356	Bdnf,Hspa4,Myc,Notch1,Pdgfra
GO.0055001	muscle cell development	4	0.00141	ENSRNOP00000003077,ENSRNOP00000008722,ENSRNOP00000024084,ENSRNOP00000026212	Acta1,Cav2,Notch1,Pdgfra
GO.0060284	regulation of cell development	8	0.00141	ENSRNOP00000002837,ENSRNOP00000004956,ENSRNOP00000005311,ENSRNOP00000007788,ENSRNOP00000012137,ENSRNOP00000014785,ENSRNOP00000024430,ENSRNOP00000026760	Cntn4,Col1a1,Col3a1,Itgb1,Pparg,Rest,Stat3,Vim
GO.0043410	positive regulation of MAPK cascade	6	0.00142	ENSRNOP00000003077,ENSRNOP00000008722,ENSRNOP00000012588,ENSRNOP00000014785,ENSRNOP00000019267,ENSRNOP00000020528	Cav2,Ctgf,Igf1r,Itgb1,Kras,Pdgfra
GO.0072001	renal system development	5	0.00147	ENSRNOP00000003077,ENSRNOP00000006188,ENSRNOP00000023628,ENSRNOP00000026212,ENSRNOP00000064356	Bdnf,Hspa4,Myc,Notch1,Pdgfra
GO.0044087	regulation of cellular component biogenesis	7	0.00151	ENSRNOP00000002837,ENSRNOP00000020528,ENSRNOP00000026212,ENSRNOP00000026637,ENSRNOP00000040699,ENSRNOP00000064356,ENSRNOP00000064368	Apod,Bdnf,Ctgf,Notch1,Rest,Stx1a,Vegfa
GO.0044702	single organism reproductive process	9	0.00151	ENSRNOP00000003077,ENSRNOP00000009402,ENSRNOP00000012137,ENSRNOP00000014785,ENSRNOP00000019267,ENSRNOP00000019403,ENSRNOP00000022679,ENSRNOP00000024430,ENSRNOP00000042230	Dhcr24,Hif1a,Igf1r,Itgb1,Mmp2,Pdgfra,Pparg,Sp1,Vim
GO.0071496	cellular response to external stimulus	6	0.00156	ENSRNOP00000005311,ENSRNOP00000012137,ENSRNOP00000014785,ENSRNOP00000019192,ENSRNOP00000025064,ENSRNOP00000042230	Col1a1,Hif1a,Hmox1,Hspa5,Itgb1,Pparg
GO.2000113	negative regulation of cellular macromolecule biosynthetic process	8	0.00157	ENSRNOP00000002837,ENSRNOP00000006188,ENSRNOP00000017000,ENSRNOP00000019192,ENSRNOP00000019267,ENSRNOP00000028793,ENSRNOP00000042230,ENSRNOP00000058593	Hif1a,Hmox1,Hspa8,Igf1r,Myc,Rest,S100a1,Txnip
GO.0023057	negative regulation of signaling	8	0.00165	ENSRNOP00000002837,ENSRNOP00000005995,ENSRNOP00000012137,ENSRNOP00000019192,ENSRNOP00000025064,ENSRNOP00000026212,ENSRNOP00000064356,ENSRNOP00000064368	Apod,Bdnf,Hmox1,Hspa5,Igf1,Notch1,Pparg,Rest
GO.0010648	negative regulation of cell communication	8	0.00173	ENSRNOP00000002837,ENSRNOP00000005995,ENSRNOP00000012137,ENSRNOP00000019192,ENSRNOP00000025064,ENSRNOP00000026212,ENSRNOP00000064356,ENSRNOP00000064368	Apod,Bdnf,Hmox1,Hspa5,Igf1,Notch1,Pparg,Rest
GO.0045600	positive regulation of fat cell differentiation	3	0.00173	ENSRNOP00000005995,ENSRNOP00000006426,ENSRNOP00000012137	Igf1,Pparg,Wif1
GO.0003008	system process	10	0.00176	ENSRNOP00000005311,ENSRNOP00000005995,ENSRNOP00000012137,ENSRNOP00000012588,ENSRNOP00000019192,ENSRNOP00000021819,ENSRNOP00000024084,ENSRNOP00000026637,ENSRNOP00000063604,ENSRNOP00000064356	Acta1,Bdnf,Col1a1,Hmox1,Igf1,Kras,Pparg,Scn2b,Slc17a7,Vegfa
GO.0080134	regulation of response to stress	8	0.00188	ENSRNOP00000003077,ENSRNOP00000006188,ENSRNOP00000016942,ENSRNOP00000019267,ENSRNOP00000020528,ENSRNOP00000042230,ENSRNOP00000060874,ENSRNOP00000064368	Apod,Ctgf,Hif1a,Igf1r,Myc,Pdgfra,Scarb1,Syk
GO.0010712	regulation of collagen metabolic process	3	0.00196	ENSRNOP00000012137,ENSRNOP00000014785,ENSRNOP00000020528	Ctgf,Itgb1,Pparg
GO.0051384	response to glucocorticoid	6	0.00197	ENSRNOP00000002837,ENSRNOP00000005995,ENSRNOP00000012588,ENSRNOP00000026637,ENSRNOP00000042230,ENSRNOP00000063822	Calm1,Hif1a,Igf1,Kras,Rest,Vegfa
GO.1901576	organic substance biosynthetic process	16	0.00199	ENSRNOP00000002837,ENSRNOP00000004232,ENSRNOP00000005311,ENSRNOP00000006188,ENSRNOP00000009402,ENSRNOP00000012137,ENSRNOP00000019403,ENSRNOP00000020528,ENSRNOP00000023256,ENSRNOP00000026212,ENSRNOP00000026760,ENSRNOP00000028793,ENSRNOP00000042230,ENSRNOP00000057733,ENSRNOP00000058593,ENSRNOP00000060874	Col1a1,Ctgf,Dhcr24,Hif1a,Hspa8,Myc,Notch1,Parp1,Pparg,Rest,Runx2,Scarb1,Slc2a4,Sp1,Stat3,Txnip
GO.0031669	cellular response to nutrient levels	5	0.002	ENSRNOP00000005311,ENSRNOP00000012137,ENSRNOP00000014785,ENSRNOP00000019192,ENSRNOP00000025064	Col1a1,Hmox1,Hspa5,Itgb1,Pparg
GO.0044763	single-organism cellular process	28	0.00202	ENSRNOP00000002837,ENSRNOP00000003077,ENSRNOP00000004232,ENSRNOP00000005995,ENSRNOP00000006188,ENSRNOP00000006238,ENSRNOP00000006426,ENSRNOP00000007788,ENSRNOP00000008722,ENSRNOP00000008972,ENSRNOP00000009402,ENSRNOP00000010491,ENSRNOP00000011196,ENSRNOP00000014785,ENSRNOP00000016942,ENSRNOP00000018877,ENSRNOP00000019192,ENSRNOP00000019403,ENSRNOP00000022679,ENSRNOP00000024084,ENSRNOP00000024430,…	Acta1,Apod,Calm1,Calu,Cav2,Cntn4,Dcx,Dhcr24,Hmox1,Igf1,Il6st,Itgb1,Kcnj16,Mmp2,Myc,Olr1,Parp1,Pdgfra,Rest,Runx2,Scarb1,Sept3,Sp1,Syk,Txnip,Vegfa,Vim,Wif1
GO.0071295	cellular response to vitamin	3	0.00221	ENSRNOP00000005311,ENSRNOP00000012137,ENSRNOP00000014785	Col1a1,Itgb1,Pparg
GO.0051090	regulation of sequence-specific DNA binding transcription factor activity	5	0.00229	ENSRNOP00000012137,ENSRNOP00000012588,ENSRNOP00000019192,ENSRNOP00000019267,ENSRNOP00000064356	Bdnf,Hmox1,Igf1r,Kras,Pparg
GO.0051093	negative regulation of developmental process	7	0.00229	ENSRNOP00000002837,ENSRNOP00000004956,ENSRNOP00000006188,ENSRNOP00000007788,ENSRNOP00000012588,ENSRNOP00000014785,ENSRNOP00000026760	Cntn4,Col3a1,Itgb1,Kras,Myc,Rest,Stat3
GO.0060379	cardiac muscle cell myoblast differentiation	2	0.00229	ENSRNOP00000002837,ENSRNOP00000026212	Notch1,Rest
GO.0071306	cellular response to vitamin E	2	0.00229	ENSRNOP00000005311,ENSRNOP00000012137	Col1a1,Pparg
GO.1902531	regulation of intracellular signal transduction	9	0.00229	ENSRNOP00000003077,ENSRNOP00000004956,ENSRNOP00000005995,ENSRNOP00000008722,ENSRNOP00000014785,ENSRNOP00000016942,ENSRNOP00000019192,ENSRNOP00000020528,ENSRNOP00000026212	Cav2,Col3a1,Ctgf,Hmox1,Igf1,Itgb1,Notch1,Pdgfra,Syk
GO.0006915	apoptotic process	8	0.00231	ENSRNOP00000002837,ENSRNOP00000005995,ENSRNOP00000006188,ENSRNOP00000009402,ENSRNOP00000012137,ENSRNOP00000019192,ENSRNOP00000020528,ENSRNOP00000026212	Ctgf,Dhcr24,Hmox1,Igf1,Myc,Notch1,Pparg,Rest
GO.0033036	macromolecule localization	11	0.00244	ENSRNOP00000005311,ENSRNOP00000009402,ENSRNOP00000012137,ENSRNOP00000014785,ENSRNOP00000025064,ENSRNOP00000026212,ENSRNOP00000026760,ENSRNOP00000027773,ENSRNOP00000028793,ENSRNOP00000040699,ENSRNOP00000060874	Actn4,Col1a1,Dhcr24,Hspa5,Itgb1,Notch1,Pparg,Scarb1,Stat3,Stx1a,Txnip
GO.0033197	response to vitamin E	3	0.00244	ENSRNOP00000005311,ENSRNOP00000012137,ENSRNOP00000019267	Col1a1,Igf1r,Pparg
GO.0048662	negative regulation of smooth muscle cell proliferation	3	0.00244	ENSRNOP00000012137,ENSRNOP00000019192,ENSRNOP00000064368	Apod,Hmox1,Pparg
GO.0051641	cellular localization	11	0.00251	ENSRNOP00000005311,ENSRNOP00000014785,ENSRNOP00000016942,ENSRNOP00000020528,ENSRNOP00000025064,ENSRNOP00000026212,ENSRNOP00000026760,ENSRNOP00000028793,ENSRNOP00000040859,ENSRNOP00000042230,ENSRNOP00000064356	Bdnf,Canx,Col1a1,Ctgf,Hif1a,Hspa5,Itgb1,Notch1,Stat3,Syk,Txnip
GO.0055123	digestive system development	4	0.00256	ENSRNOP00000003077,ENSRNOP00000004956,ENSRNOP00000019267,ENSRNOP00000026212	Col3a1,Igf1r,Notch1,Pdgfra
GO.0071383	cellular response to steroid hormone stimulus	5	0.00268	ENSRNOP00000002837,ENSRNOP00000006188,ENSRNOP00000012137,ENSRNOP00000022679,ENSRNOP00000026637	Mmp2,Myc,Pparg,Rest,Vegfa
GO.0006954	inflammatory response	6	0.00271	ENSRNOP00000011196,ENSRNOP00000016942,ENSRNOP00000019192,ENSRNOP00000026212,ENSRNOP00000026760,ENSRNOP00000064356	Bdnf,Hmox1,Notch1,Olr1,Stat3,Syk
GO.0051817	modification of morphology or physiology of other organism involved in symbiotic interaction	3	0.00272	ENSRNOP00000002837,ENSRNOP00000006188,ENSRNOP00000019403	Myc,Rest,Sp1
GO.0008104	protein localization	10	0.00281	ENSRNOP00000005311,ENSRNOP00000009402,ENSRNOP00000012137,ENSRNOP00000014785,ENSRNOP00000025064,ENSRNOP00000026212,ENSRNOP00000026760,ENSRNOP00000027773,ENSRNOP00000028793,ENSRNOP00000040699	Actn4,Col1a1,Dhcr24,Hspa5,Itgb1,Notch1,Pparg,Stat3,Stx1a,Txnip
GO.0009987	cellular process	31	0.00284	ENSRNOP00000002837,ENSRNOP00000003077,ENSRNOP00000004232,ENSRNOP00000005995,ENSRNOP00000006188,ENSRNOP00000006238,ENSRNOP00000006426,ENSRNOP00000007788,ENSRNOP00000008722,ENSRNOP00000008930,ENSRNOP00000008972,ENSRNOP00000009233,ENSRNOP00000010491,ENSRNOP00000011196,ENSRNOP00000014785,ENSRNOP00000016942,ENSRNOP00000018877,ENSRNOP00000019192,ENSRNOP00000019403,ENSRNOP00000022679,ENSRNOP00000024084,…	Acta1,Apod,Calm1,Calu,Canx,Cav2,Cntn4,Dcx,Grpel1,Hmox1,Hspa8,Igf1,Il6st,Insig1,Itgb1,Kcnj16,Mmp2,Myc,Olr1,Parp1,Pdgfra,Rest,Runx2,Scarb1,Sept3,Sp1,Syk,Ubb,Vegfa,Vim,Wif1
GO.0071559	response to transforming growth factor beta	4	0.00299	ENSRNOP00000004232,ENSRNOP00000004956,ENSRNOP00000005311,ENSRNOP00000014785	Col1a1,Col3a1,Itgb1,Parp1
GO.0051146	striated muscle cell differentiation	4	0.00314	ENSRNOP00000003077,ENSRNOP00000008722,ENSRNOP00000012588,ENSRNOP00000024084	Acta1,Cav2,Kras,Pdgfra
GO.0050767	regulation of neurogenesis	7	0.00321	ENSRNOP00000002837,ENSRNOP00000004956,ENSRNOP00000007788,ENSRNOP00000012137,ENSRNOP00000014785,ENSRNOP00000024430,ENSRNOP00000026760	Cntn4,Col3a1,Itgb1,Pparg,Rest,Stat3,Vim
GO.0071456	cellular response to hypoxia	4	0.0033	ENSRNOP00000019192,ENSRNOP00000023256,ENSRNOP00000026212,ENSRNOP00000042230	Hif1a,Hmox1,Notch1,Slc2a4
GO.0000003	reproduction	8	0.00338	ENSRNOP00000003077,ENSRNOP00000014785,ENSRNOP00000019403,ENSRNOP00000022679,ENSRNOP00000024430,ENSRNOP00000026212,ENSRNOP00000026760,ENSRNOP00000042230	Hif1a,Itgb1,Mmp2,Notch1,Pdgfra,Sp1,Stat3,Vim
GO.0061448	connective tissue development	4	0.00347	ENSRNOP00000005311,ENSRNOP00000020528,ENSRNOP00000026212,ENSRNOP00000057733	Col1a1,Ctgf,Notch1,Runx2
GO.0002009	morphogenesis of an epithelium	5	0.00355	ENSRNOP00000006188,ENSRNOP00000012588,ENSRNOP00000019267,ENSRNOP00000022679,ENSRNOP00000026212	Igf1r,Kras,Mmp2,Myc,Notch1
GO.0060977	coronary vasculature morphogenesis	2	0.00355	ENSRNOP00000026212,ENSRNOP00000026637	Notch1,Vegfa
GO.0070102	interleukin-6-mediated signaling pathway	2	0.00355	ENSRNOP00000018877,ENSRNOP00000026760	Il6st,Stat3
GO.0043279	response to alkaloid	5	0.00362	ENSRNOP00000004232,ENSRNOP00000012137,ENSRNOP00000019192,ENSRNOP00000022679,ENSRNOP00000042230	Hif1a,Hmox1,Mmp2,Parp1,Pparg
GO.0055082	cellular chemical homeostasis	7	0.0037	ENSRNOP00000003077,ENSRNOP00000006188,ENSRNOP00000014785,ENSRNOP00000018877,ENSRNOP00000019192,ENSRNOP00000042230,ENSRNOP00000063604	Hif1a,Hmox1,Il6st,Itgb1,Myc,Pdgfra,Slc17a7
GO.0048660	regulation of smooth muscle cell proliferation	4	0.00375	ENSRNOP00000012137,ENSRNOP00000026637,ENSRNOP00000042230,ENSRNOP00000064368	Apod,Hif1a,Pparg,Vegfa
GO.0050731	positive regulation of peptidyl-tyrosine phosphorylation	4	0.00394	ENSRNOP00000005995,ENSRNOP00000008722,ENSRNOP00000014785,ENSRNOP00000026637	Cav2,Igf1,Itgb1,Vegfa
GO.0045893	positive regulation of transcription, DNA-templated	8	0.0042	ENSRNOP00000004232,ENSRNOP00000005311,ENSRNOP00000006188,ENSRNOP00000012137,ENSRNOP00000012588,ENSRNOP00000026637,ENSRNOP00000042230,ENSRNOP00000064356	Bdnf,Col1a1,Hif1a,Kras,Myc,Parp1,Pparg,Vegfa
GO.0014015	positive regulation of gliogenesis	3	0.00437	ENSRNOP00000012137,ENSRNOP00000024430,ENSRNOP00000026212	Notch1,Pparg,Vim
GO.0033189	response to vitamin A	3	0.00437	ENSRNOP00000012137,ENSRNOP00000026637,ENSRNOP00000064356	Bdnf,Pparg,Vegfa
GO.0048706	embryonic skeletal system development	3	0.00437	ENSRNOP00000003077,ENSRNOP00000005311,ENSRNOP00000019403	Col1a1,Pdgfra,Sp1
GO.0051101	regulation of DNA binding	3	0.00437	ENSRNOP00000004232,ENSRNOP00000019192,ENSRNOP00000023628	Hmox1,Hspa4,Parp1
GO.0060341	regulation of cellular localization	9	0.00437	ENSRNOP00000002837,ENSRNOP00000004232,ENSRNOP00000008722,ENSRNOP00000014785,ENSRNOP00000016942,ENSRNOP00000018877,ENSRNOP00000019192,ENSRNOP00000026212,ENSRNOP00000064368	Apod,Cav2,Hmox1,Il6st,Itgb1,Notch1,Parp1,Rest,Syk
GO.0007162	negative regulation of cell adhesion	4	0.00448	ENSRNOP00000005311,ENSRNOP00000022679,ENSRNOP00000026212,ENSRNOP00000064368	Apod,Col1a1,Mmp2,Notch1
GO.0051050	positive regulation of transport	8	0.00464	ENSRNOP00000004232,ENSRNOP00000005995,ENSRNOP00000012137,ENSRNOP00000014785,ENSRNOP00000016942,ENSRNOP00000017000,ENSRNOP00000027773,ENSRNOP00000040699	Actn4,Igf1,Itgb1,Parp1,Pparg,S100a1,Stx1a,Syk
GO.0007517	muscle organ development	4	0.00468	ENSRNOP00000004956,ENSRNOP00000008722,ENSRNOP00000024084,ENSRNOP00000026212	Acta1,Cav2,Col3a1,Notch1
GO.0051336	regulation of hydrolase activity	8	0.00481	ENSRNOP00000002837,ENSRNOP00000005995,ENSRNOP00000006188,ENSRNOP00000009179,ENSRNOP00000009402,ENSRNOP00000012137,ENSRNOP00000020528,ENSRNOP00000025064	Ctgf,Dhcr24,Hspa5,Igf1,Myc,Pparg,Ppia,Rest
GO.0030336	negative regulation of cell migration	4	0.00486	ENSRNOP00000004956,ENSRNOP00000026212,ENSRNOP00000026760,ENSRNOP00000064368	Apod,Col3a1,Notch1,Stat3
GO.0031175	neuron projection development	6	0.00496	ENSRNOP00000007788,ENSRNOP00000008972,ENSRNOP00000019267,ENSRNOP00000022679,ENSRNOP00000026212,ENSRNOP00000064368	Apod,Calu,Cntn4,Igf1r,Mmp2,Notch1
GO.0043619	regulation of transcription from RNA polymerase II promoter in response to oxidative stress	2	0.00496	ENSRNOP00000019192,ENSRNOP00000042230	Hif1a,Hmox1
GO.0060976	coronary vasculature development	2	0.00496	ENSRNOP00000026212,ENSRNOP00000026637	Notch1,Vegfa
GO.2001223	negative regulation of neuron migration	2	0.00496	ENSRNOP00000004956,ENSRNOP00000026760	Col3a1,Stat3
GO.0006457	protein folding	4	0.00504	ENSRNOP00000008930,ENSRNOP00000009179,ENSRNOP00000040859,ENSRNOP00000058593	Canx,Grpel1,Hspa8,Ppia
GO.0006366	transcription from RNA polymerase II promoter	5	0.00514	ENSRNOP00000006188,ENSRNOP00000012137,ENSRNOP00000019403,ENSRNOP00000026212,ENSRNOP00000026760	Myc,Notch1,Pparg,Sp1,Stat3
GO.1903522	regulation of blood circulation	5	0.00514	ENSRNOP00000017000,ENSRNOP00000020528,ENSRNOP00000021819,ENSRNOP00000022679,ENSRNOP00000042230	Ctgf,Hif1a,Mmp2,S100a1,Scn2b
GO.0030003	cellular cation homeostasis	6	0.00533	ENSRNOP00000003077,ENSRNOP00000006188,ENSRNOP00000014785,ENSRNOP00000018877,ENSRNOP00000019192,ENSRNOP00000063604	Hmox1,Il6st,Itgb1,Myc,Pdgfra,Slc17a7
GO.1901360	organic cyclic compound metabolic process	15	0.00536	ENSRNOP00000002837,ENSRNOP00000006188,ENSRNOP00000009233,ENSRNOP00000009402,ENSRNOP00000012137,ENSRNOP00000019192,ENSRNOP00000019403,ENSRNOP00000020528,ENSRNOP00000026212,ENSRNOP00000026760,ENSRNOP00000028793,ENSRNOP00000042230,ENSRNOP00000057733,ENSRNOP00000058593,ENSRNOP00000064356	Bdnf,Ctgf,Dhcr24,Hif1a,Hmox1,Hspa8,Insig1,Myc,Notch1,Pparg,Rest,Runx2,Sp1,Stat3,Txnip
GO.0009607	response to biotic stimulus	7	0.00554	ENSRNOP00000005995,ENSRNOP00000016942,ENSRNOP00000025064,ENSRNOP00000026212,ENSRNOP00000028793,ENSRNOP00000042230,ENSRNOP00000060874	Hif1a,Hspa5,Igf1,Notch1,Scarb1,Syk,Txnip
GO.1903034	regulation of response to wounding	5	0.00556	ENSRNOP00000003077,ENSRNOP00000006188,ENSRNOP00000012137,ENSRNOP00000016942,ENSRNOP00000064368	Apod,Myc,Pdgfra,Pparg,Syk
GO.0046890	regulation of lipid biosynthetic process	4	0.00568	ENSRNOP00000002837,ENSRNOP00000005995,ENSRNOP00000019267,ENSRNOP00000060874	Igf1,Igf1r,Rest,Scarb1
GO.0051051	negative regulation of transport	6	0.00588	ENSRNOP00000002837,ENSRNOP00000006188,ENSRNOP00000019192,ENSRNOP00000025064,ENSRNOP00000026212,ENSRNOP00000064368	Apod,Hmox1,Hspa5,Myc,Notch1,Rest
GO.0050776	regulation of immune response	5	0.00621	ENSRNOP00000004956,ENSRNOP00000012137,ENSRNOP00000016942,ENSRNOP00000019192,ENSRNOP00000060874	Col3a1,Hmox1,Pparg,Scarb1,Syk
GO.0048609	multicellular organismal reproductive process	7	0.00638	ENSRNOP00000003077,ENSRNOP00000014785,ENSRNOP00000019403,ENSRNOP00000022679,ENSRNOP00000024430,ENSRNOP00000026212,ENSRNOP00000042230	Hif1a,Itgb1,Mmp2,Notch1,Pdgfra,Sp1,Vim
GO.0010885	regulation of cholesterol storage	2	0.00665	ENSRNOP00000012137,ENSRNOP00000060874	Pparg,Scarb1
GO.0043921	modulation by host of viral transcription	2	0.00665	ENSRNOP00000002837,ENSRNOP00000019403	Rest,Sp1
GO.0032504	multicellular organism reproduction	7	0.00686	ENSRNOP00000003077,ENSRNOP00000014785,ENSRNOP00000019403,ENSRNOP00000022679,ENSRNOP00000024430,ENSRNOP00000026212,ENSRNOP00000042230	Hif1a,Itgb1,Mmp2,Notch1,Pdgfra,Sp1,Vim
GO.0050764	regulation of phagocytosis	3	0.00704	ENSRNOP00000012137,ENSRNOP00000016942,ENSRNOP00000060874	Pparg,Scarb1,Syk
GO.0034645	cellular macromolecule biosynthetic process	12	0.00749	ENSRNOP00000002837,ENSRNOP00000004232,ENSRNOP00000006188,ENSRNOP00000012137,ENSRNOP00000019403,ENSRNOP00000020528,ENSRNOP00000026212,ENSRNOP00000026760,ENSRNOP00000028793,ENSRNOP00000042230,ENSRNOP00000057733,ENSRNOP00000058593	Ctgf,Hif1a,Hspa8,Myc,Notch1,Parp1,Pparg,Rest,Runx2,Sp1,Stat3,Txnip
GO.0071248	cellular response to metal ion	4	0.00749	ENSRNOP00000012137,ENSRNOP00000019192,ENSRNOP00000025064,ENSRNOP00000042230	Hif1a,Hmox1,Hspa5,Pparg
GO.0015711	organic anion transport	5	0.00754	ENSRNOP00000006188,ENSRNOP00000012137,ENSRNOP00000060874,ENSRNOP00000063604,ENSRNOP00000064356	Bdnf,Myc,Pparg,Scarb1,Slc17a7
GO.0050777	negative regulation of immune response	3	0.00754	ENSRNOP00000004956,ENSRNOP00000012137,ENSRNOP00000019192	Col3a1,Hmox1,Pparg
GO.1903900	regulation of viral life cycle	3	0.00754	ENSRNOP00000002837,ENSRNOP00000009179,ENSRNOP00000019403	Ppia,Rest,Sp1
GO.0044237	cellular metabolic process	22	0.00755	ENSRNOP00000002837,ENSRNOP00000003077,ENSRNOP00000004232,ENSRNOP00000004956,ENSRNOP00000006188,ENSRNOP00000008930,ENSRNOP00000016942,ENSRNOP00000018877,ENSRNOP00000019192,ENSRNOP00000019403,ENSRNOP00000020528,ENSRNOP00000025064,ENSRNOP00000026212,ENSRNOP00000028793,ENSRNOP00000040859,ENSRNOP00000042230,ENSRNOP00000043934,ENSRNOP00000057733,ENSRNOP00000058593,ENSRNOP00000060874,ENSRNOP00000064356,…	Bdnf,Canx,Col3a1,Ctgf,Dcx,Grpel1,Hif1a,Hmox1,Hspa5,Hspa8,Il6st,Myc,Notch1,Parp1,Pdgfra,Rest,Runx2,Scarb1,Sp1,Syk,Txnip,Ubb
GO.0043408	regulation of MAPK cascade	6	0.0079	ENSRNOP00000003077,ENSRNOP00000008722,ENSRNOP00000012588,ENSRNOP00000014785,ENSRNOP00000016942,ENSRNOP00000020528	Cav2,Ctgf,Itgb1,Kras,Pdgfra,Syk
GO.0007160	cell-matrix adhesion	3	0.008	ENSRNOP00000004956,ENSRNOP00000014785,ENSRNOP00000020528	Col3a1,Ctgf,Itgb1
GO.0014706	striated muscle tissue development	4	0.008	ENSRNOP00000003077,ENSRNOP00000008722,ENSRNOP00000024084,ENSRNOP00000026212	Acta1,Cav2,Notch1,Pdgfra
GO.0045765	regulation of angiogenesis	4	0.008	ENSRNOP00000019192,ENSRNOP00000023628,ENSRNOP00000026212,ENSRNOP00000026637	Hmox1,Hspa4,Notch1,Vegfa
GO.0060135	maternal process involved in female pregnancy	3	0.008	ENSRNOP00000014785,ENSRNOP00000024430,ENSRNOP00000042230	Hif1a,Itgb1,Vim
GO.0043009	chordate embryonic development	5	0.00801	ENSRNOP00000003077,ENSRNOP00000005311,ENSRNOP00000006188,ENSRNOP00000019403,ENSRNOP00000026212	Col1a1,Myc,Notch1,Pdgfra,Sp1
GO.0015031	protein transport	8	0.00804	ENSRNOP00000005311,ENSRNOP00000012137,ENSRNOP00000014785,ENSRNOP00000026212,ENSRNOP00000026760,ENSRNOP00000027773,ENSRNOP00000028793,ENSRNOP00000040699	Actn4,Col1a1,Itgb1,Notch1,Pparg,Stat3,Stx1a,Txnip
GO.0045955	negative regulation of calcium ion-dependent exocytosis	2	0.00836	ENSRNOP00000002837,ENSRNOP00000026212	Notch1,Rest
GO.0048009	insulin-like growth factor receptor signaling pathway	2	0.00836	ENSRNOP00000005995,ENSRNOP00000019267	Igf1,Igf1r
GO.0048741	skeletal muscle fiber development	2	0.00836	ENSRNOP00000008722,ENSRNOP00000024084	Acta1,Cav2
GO.0090031	positive regulation of steroid hormone biosynthetic process	2	0.00836	ENSRNOP00000005995,ENSRNOP00000019267	Igf1,Igf1r
GO.0017158	regulation of calcium ion-dependent exocytosis	3	0.00847	ENSRNOP00000002837,ENSRNOP00000026212,ENSRNOP00000040699	Notch1,Rest,Stx1a
GO.0035051	cardiocyte differentiation	3	0.00904	ENSRNOP00000002837,ENSRNOP00000003077,ENSRNOP00000026212	Notch1,Pdgfra,Rest
GO.0061024	membrane organization	6	0.00919	ENSRNOP00000006188,ENSRNOP00000008722,ENSRNOP00000009402,ENSRNOP00000014785,ENSRNOP00000026760,ENSRNOP00000040699	Cav2,Dhcr24,Itgb1,Myc,Stat3,Stx1a
GO.0048871	multicellular organismal homeostasis	4	0.00935	ENSRNOP00000012588,ENSRNOP00000014785,ENSRNOP00000020528,ENSRNOP00000026760	Ctgf,Itgb1,Kras,Stat3
GO.0008283	cell proliferation	5	0.00954	ENSRNOP00000006188,ENSRNOP00000020528,ENSRNOP00000026212,ENSRNOP00000026760,ENSRNOP00000060874	Ctgf,Myc,Notch1,Scarb1,Stat3
GO.0043467	regulation of generation of precursor metabolites and energy	3	0.00962	ENSRNOP00000005995,ENSRNOP00000006188,ENSRNOP00000026760	Igf1,Myc,Stat3
GO.0072006	nephron development	3	0.00962	ENSRNOP00000003077,ENSRNOP00000006188,ENSRNOP00000026212	Myc,Notch1,Pdgfra
GO.0051649	establishment of localization in cell	9	0.01	ENSRNOP00000014785,ENSRNOP00000016942,ENSRNOP00000020528,ENSRNOP00000026212,ENSRNOP00000026760,ENSRNOP00000028793,ENSRNOP00000040859,ENSRNOP00000042230,ENSRNOP00000064356	Bdnf,Canx,Ctgf,Hif1a,Itgb1,Notch1,Stat3,Syk,Txnip
GO.0001553	luteinization	2	0.0101	ENSRNOP00000003077,ENSRNOP00000022679	Mmp2,Pdgfra
GO.0032102	negative regulation of response to external stimulus	4	0.0101	ENSRNOP00000003077,ENSRNOP00000012137,ENSRNOP00000026212,ENSRNOP00000064368	Apod,Notch1,Pdgfra,Pparg
GO.0035239	tube morphogenesis	4	0.0101	ENSRNOP00000003077,ENSRNOP00000006188,ENSRNOP00000012588,ENSRNOP00000026637	Kras,Myc,Pdgfra,Vegfa
GO.0045906	negative regulation of vasoconstriction	2	0.0101	ENSRNOP00000022679,ENSRNOP00000042230	Hif1a,Mmp2
GO.0048754	branching morphogenesis of an epithelial tube	3	0.0101	ENSRNOP00000006188,ENSRNOP00000012588,ENSRNOP00000026212	Kras,Myc,Notch1
GO.0061383	trabecula morphogenesis	2	0.0101	ENSRNOP00000005311,ENSRNOP00000026212	Col1a1,Notch1
GO.0071229	cellular response to acid chemical	4	0.0101	ENSRNOP00000004956,ENSRNOP00000006188,ENSRNOP00000012137,ENSRNOP00000042230	Col3a1,Hif1a,Myc,Pparg
GO.0072091	regulation of stem cell proliferation	3	0.0101	ENSRNOP00000006188,ENSRNOP00000026212,ENSRNOP00000064356	Bdnf,Myc,Notch1
GO.0035690	cellular response to drug	3	0.0106	ENSRNOP00000002837,ENSRNOP00000026637,ENSRNOP00000042230	Hif1a,Rest,Vegfa
GO.0042246	tissue regeneration	3	0.0106	ENSRNOP00000024430,ENSRNOP00000026212,ENSRNOP00000064368	Apod,Notch1,Vim
GO.0048145	regulation of fibroblast proliferation	3	0.0106	ENSRNOP00000003077,ENSRNOP00000006188,ENSRNOP00000012137	Myc,Pdgfra,Pparg
GO.0048666	neuron development	6	0.0106	ENSRNOP00000007788,ENSRNOP00000008972,ENSRNOP00000019267,ENSRNOP00000022679,ENSRNOP00000026212,ENSRNOP00000064368	Apod,Calu,Cntn4,Igf1r,Mmp2,Notch1
GO.0009968	negative regulation of signal transduction	6	0.0115	ENSRNOP00000005995,ENSRNOP00000012137,ENSRNOP00000019192,ENSRNOP00000025064,ENSRNOP00000026212,ENSRNOP00000064368	Apod,Hmox1,Hspa5,Igf1,Notch1,Pparg
GO.0098771	inorganic ion homeostasis	6	0.0115	ENSRNOP00000003077,ENSRNOP00000006188,ENSRNOP00000014785,ENSRNOP00000018877,ENSRNOP00000019192,ENSRNOP00000063604	Hmox1,Il6st,Itgb1,Myc,Pdgfra,Slc17a7
GO.0017157	regulation of exocytosis	4	0.0118	ENSRNOP00000002837,ENSRNOP00000016942,ENSRNOP00000019192,ENSRNOP00000026212	Hmox1,Notch1,Rest,Syk
GO.0006811	ion transport	9	0.0122	ENSRNOP00000002837,ENSRNOP00000006188,ENSRNOP00000006238,ENSRNOP00000012137,ENSRNOP00000016942,ENSRNOP00000020528,ENSRNOP00000023256,ENSRNOP00000060874,ENSRNOP00000064356	Bdnf,Ctgf,Kcnj16,Myc,Pparg,Rest,Scarb1,Slc2a4,Syk
GO.0070830	bicellular tight junction assembly	2	0.0123	ENSRNOP00000014785,ENSRNOP00000027773	Actn4,Itgb1
GO.0072073	kidney epithelium development	3	0.0127	ENSRNOP00000006188,ENSRNOP00000026212,ENSRNOP00000064356	Bdnf,Myc,Notch1
GO.0007519	skeletal muscle tissue development	3	0.0134	ENSRNOP00000008722,ENSRNOP00000024084,ENSRNOP00000026212	Acta1,Cav2,Notch1
GO.0051385	response to mineralocorticoid	3	0.0134	ENSRNOP00000012588,ENSRNOP00000020528,ENSRNOP00000063822	Calm1,Ctgf,Kras
GO.0010467	gene expression	12	0.0137	ENSRNOP00000002837,ENSRNOP00000004232,ENSRNOP00000006188,ENSRNOP00000009402,ENSRNOP00000012137,ENSRNOP00000019403,ENSRNOP00000026212,ENSRNOP00000026760,ENSRNOP00000028793,ENSRNOP00000042230,ENSRNOP00000057733,ENSRNOP00000058593	Dhcr24,Hif1a,Hspa8,Myc,Notch1,Parp1,Pparg,Rest,Runx2,Sp1,Stat3,Txnip
GO.0042593	glucose homeostasis	4	0.0145	ENSRNOP00000012137,ENSRNOP00000023256,ENSRNOP00000026760,ENSRNOP00000042230	Hif1a,Pparg,Slc2a4,Stat3
GO.0048844	artery morphogenesis	2	0.0145	ENSRNOP00000004956,ENSRNOP00000026212	Col3a1,Notch1
GO.0072012	glomerulus vasculature development	2	0.0145	ENSRNOP00000003077,ENSRNOP00000026212	Notch1,Pdgfra
GO.0000122	negative regulation of transcription from RNA polymerase II promoter	5	0.0147	ENSRNOP00000002837,ENSRNOP00000006188,ENSRNOP00000017000,ENSRNOP00000028793,ENSRNOP00000042230	Hif1a,Myc,Rest,S100a1,Txnip
GO.0046889	positive regulation of lipid biosynthetic process	3	0.0148	ENSRNOP00000005995,ENSRNOP00000019267,ENSRNOP00000060874	Igf1,Igf1r,Scarb1
GO.0071347	cellular response to interleukin-1	3	0.0148	ENSRNOP00000006188,ENSRNOP00000022679,ENSRNOP00000042230	Hif1a,Mmp2,Myc
GO.0009266	response to temperature stimulus	4	0.0154	ENSRNOP00000012137,ENSRNOP00000019192,ENSRNOP00000023628,ENSRNOP00000026637	Hmox1,Hspa4,Pparg,Vegfa
GO.0045667	regulation of osteoblast differentiation	3	0.0156	ENSRNOP00000005995,ENSRNOP00000026212,ENSRNOP00000057733	Igf1,Notch1,Runx2
GO.0055002	striated muscle cell development	3	0.0156	ENSRNOP00000003077,ENSRNOP00000008722,ENSRNOP00000024084	Acta1,Cav2,Pdgfra
GO.0033554	cellular response to stress	8	0.0162	ENSRNOP00000006188,ENSRNOP00000008972,ENSRNOP00000012137,ENSRNOP00000019192,ENSRNOP00000022679,ENSRNOP00000026212,ENSRNOP00000042230,ENSRNOP00000064368	Apod,Calu,Hif1a,Hmox1,Mmp2,Myc,Notch1,Pparg
GO.0001654	eye development	4	0.0163	ENSRNOP00000003077,ENSRNOP00000019403,ENSRNOP00000026760,ENSRNOP00000063604	Pdgfra,Slc17a7,Sp1,Stat3
GO.0048661	positive regulation of smooth muscle cell proliferation	3	0.0163	ENSRNOP00000019192,ENSRNOP00000026637,ENSRNOP00000042230	Hif1a,Hmox1,Vegfa
GO.0051216	cartilage development	3	0.0163	ENSRNOP00000005311,ENSRNOP00000020528,ENSRNOP00000057733	Col1a1,Ctgf,Runx2
GO.2000737	negative regulation of stem cell differentiation	2	0.0168	ENSRNOP00000002837,ENSRNOP00000026212	Notch1,Rest
GO.0044267	cellular protein metabolic process	12	0.0169	ENSRNOP00000002837,ENSRNOP00000003077,ENSRNOP00000004232,ENSRNOP00000004956,ENSRNOP00000006188,ENSRNOP00000008930,ENSRNOP00000016942,ENSRNOP00000025064,ENSRNOP00000040859,ENSRNOP00000043934,ENSRNOP00000058593,ENSRNOP00000065381	Canx,Col3a1,Dcx,Grpel1,Hspa5,Hspa8,Myc,Parp1,Pdgfra,Rest,Syk,Ubb
GO.0060538	skeletal muscle organ development	3	0.017	ENSRNOP00000008722,ENSRNOP00000024084,ENSRNOP00000026212	Acta1,Cav2,Notch1
GO.0061041	regulation of wound healing	3	0.017	ENSRNOP00000003077,ENSRNOP00000006188,ENSRNOP00000016942	Myc,Pdgfra,Syk
GO.0051338	regulation of transferase activity	6	0.0175	ENSRNOP00000003077,ENSRNOP00000005995,ENSRNOP00000012137,ENSRNOP00000012588,ENSRNOP00000019267,ENSRNOP00000025064	Hspa5,Igf1,Igf1r,Kras,Pdgfra,Pparg
GO.0048705	skeletal system morphogenesis	3	0.0179	ENSRNOP00000003077,ENSRNOP00000005311,ENSRNOP00000020528	Col1a1,Ctgf,Pdgfra
GO.0050678	regulation of epithelial cell proliferation	4	0.0179	ENSRNOP00000006188,ENSRNOP00000008722,ENSRNOP00000026212,ENSRNOP00000026637	Cav2,Myc,Notch1,Vegfa
GO.0030198	extracellular matrix organization	3	0.0187	ENSRNOP00000004956,ENSRNOP00000005311,ENSRNOP00000020528	Col1a1,Col3a1,Ctgf
GO.0030522	intracellular receptor signaling pathway	3	0.0187	ENSRNOP00000012137,ENSRNOP00000026760,ENSRNOP00000027773	Actn4,Pparg,Stat3
GO.0048872	homeostasis of number of cells	3	0.0187	ENSRNOP00000012588,ENSRNOP00000019192,ENSRNOP00000019403	Hmox1,Kras,Sp1
GO.0046942	carboxylic acid transport	4	0.0188	ENSRNOP00000006188,ENSRNOP00000012137,ENSRNOP00000063604,ENSRNOP00000064356	Bdnf,Myc,Pparg,Slc17a7
GO.0045944	positive regulation of transcription from RNA polymerase II promoter	6	0.0189	ENSRNOP00000004232,ENSRNOP00000006188,ENSRNOP00000012137,ENSRNOP00000026637,ENSRNOP00000026760,ENSRNOP00000042230	Hif1a,Myc,Parp1,Pparg,Stat3,Vegfa
GO.0043297	apical junction assembly	2	0.0192	ENSRNOP00000014785,ENSRNOP00000027773	Actn4,Itgb1
GO.0060840	artery development	2	0.0192	ENSRNOP00000004956,ENSRNOP00000026212	Col3a1,Notch1
GO.0001894	tissue homeostasis	3	0.0195	ENSRNOP00000012588,ENSRNOP00000014785,ENSRNOP00000020528	Ctgf,Itgb1,Kras
GO.0006875	cellular metal ion homeostasis	5	0.0202	ENSRNOP00000003077,ENSRNOP00000006188,ENSRNOP00000014785,ENSRNOP00000018877,ENSRNOP00000019192	Hmox1,Il6st,Itgb1,Myc,Pdgfra
GO.0046483	heterocycle metabolic process	13	0.0206	ENSRNOP00000002837,ENSRNOP00000006188,ENSRNOP00000012137,ENSRNOP00000019192,ENSRNOP00000019403,ENSRNOP00000020528,ENSRNOP00000026212,ENSRNOP00000026760,ENSRNOP00000028793,ENSRNOP00000042230,ENSRNOP00000057733,ENSRNOP00000058593,ENSRNOP00000064356	Bdnf,Ctgf,Hif1a,Hmox1,Hspa8,Myc,Notch1,Pparg,Rest,Runx2,Sp1,Stat3,Txnip
GO.0007155	cell adhesion	6	0.0217	ENSRNOP00000003077,ENSRNOP00000004956,ENSRNOP00000007788,ENSRNOP00000011196,ENSRNOP00000016942,ENSRNOP00000060874	Cntn4,Col3a1,Olr1,Pdgfra,Scarb1,Syk
GO.0010718	positive regulation of epithelial to mesenchymal transition	2	0.0217	ENSRNOP00000005311,ENSRNOP00000026212	Col1a1,Notch1
GO.0010996	response to auditory stimulus	2	0.0217	ENSRNOP00000042230,ENSRNOP00000064356	Bdnf,Hif1a
GO.0048008	platelet-derived growth factor receptor signaling pathway	2	0.0217	ENSRNOP00000003077,ENSRNOP00000028793	Pdgfra,Txnip
GO.0048713	regulation of oligodendrocyte differentiation	2	0.0217	ENSRNOP00000012137,ENSRNOP00000026212	Notch1,Pparg
GO.0050873	brown fat cell differentiation	2	0.0217	ENSRNOP00000012137,ENSRNOP00000023256	Pparg,Slc2a4
GO.0072132	mesenchyme morphogenesis	2	0.0217	ENSRNOP00000024084,ENSRNOP00000026212	Acta1,Notch1
GO.0071260	cellular response to mechanical stimulus	3	0.0221	ENSRNOP00000005311,ENSRNOP00000014785,ENSRNOP00000042230	Col1a1,Hif1a,Itgb1
GO.0006275	regulation of DNA replication	3	0.0232	ENSRNOP00000003077,ENSRNOP00000012137,ENSRNOP00000019267	Igf1r,Pdgfra,Pparg
GO.0006865	amino acid transport	3	0.0232	ENSRNOP00000006188,ENSRNOP00000063604,ENSRNOP00000064356	Bdnf,Myc,Slc17a7
GO.0006725	cellular aromatic compound metabolic process	13	0.0236	ENSRNOP00000002837,ENSRNOP00000006188,ENSRNOP00000012137,ENSRNOP00000019192,ENSRNOP00000019403,ENSRNOP00000020528,ENSRNOP00000026212,ENSRNOP00000026760,ENSRNOP00000028793,ENSRNOP00000042230,ENSRNOP00000057733,ENSRNOP00000058593,ENSRNOP00000064356	Bdnf,Ctgf,Hif1a,Hmox1,Hspa8,Myc,Notch1,Pparg,Rest,Runx2,Sp1,Stat3,Txnip
GO.0045807	positive regulation of endocytosis	3	0.0243	ENSRNOP00000012137,ENSRNOP00000014785,ENSRNOP00000027773	Actn4,Itgb1,Pparg
GO.0010543	regulation of platelet activation	2	0.0246	ENSRNOP00000003077,ENSRNOP00000016942	Pdgfra,Syk
GO.0021762	substantia nigra development	2	0.0246	ENSRNOP00000017000,ENSRNOP00000025064	Hspa5,S100a1
GO.0045687	positive regulation of glial cell differentiation	2	0.0246	ENSRNOP00000012137,ENSRNOP00000026212	Notch1,Pparg
GO.0071354	cellular response to interleukin-6	2	0.0246	ENSRNOP00000018877,ENSRNOP00000026760	Il6st,Stat3
GO.1903035	negative regulation of response to wounding	3	0.0252	ENSRNOP00000003077,ENSRNOP00000012137,ENSRNOP00000064368	Apod,Pdgfra,Pparg
GO.0006935	chemotaxis	4	0.0258	ENSRNOP00000003077,ENSRNOP00000016942,ENSRNOP00000026637,ENSRNOP00000064356	Bdnf,Pdgfra,Syk,Vegfa
GO.0090304	nucleic acid metabolic process	11	0.0259	ENSRNOP00000002837,ENSRNOP00000006188,ENSRNOP00000012137,ENSRNOP00000019403,ENSRNOP00000020528,ENSRNOP00000026212,ENSRNOP00000026760,ENSRNOP00000028793,ENSRNOP00000042230,ENSRNOP00000057733,ENSRNOP00000058593	Ctgf,Hif1a,Hspa8,Myc,Notch1,Pparg,Rest,Runx2,Sp1,Stat3,Txnip
GO.0008203	cholesterol metabolic process	3	0.0261	ENSRNOP00000009233,ENSRNOP00000009402,ENSRNOP00000060874	Dhcr24,Insig1,Scarb1
GO.0010769	regulation of cell morphogenesis involved in differentiation	4	0.0261	ENSRNOP00000005311,ENSRNOP00000024430,ENSRNOP00000026212,ENSRNOP00000064356	Bdnf,Col1a1,Notch1,Vim
GO.0032526	response to retinoic acid	3	0.0261	ENSRNOP00000005311,ENSRNOP00000012137,ENSRNOP00000022679	Col1a1,Mmp2,Pparg
GO.0034504	protein localization to nucleus	3	0.0261	ENSRNOP00000005311,ENSRNOP00000026760,ENSRNOP00000028793	Col1a1,Stat3,Txnip
GO.0048565	digestive tract development	3	0.0261	ENSRNOP00000003077,ENSRNOP00000004956,ENSRNOP00000026212	Col3a1,Notch1,Pdgfra
GO.0060326	cell chemotaxis	3	0.0261	ENSRNOP00000003077,ENSRNOP00000016942,ENSRNOP00000026637	Pdgfra,Syk,Vegfa
GO.0022603	regulation of anatomical structure morphogenesis	6	0.0266	ENSRNOP00000005311,ENSRNOP00000006188,ENSRNOP00000019192,ENSRNOP00000023628,ENSRNOP00000024430,ENSRNOP00000026637	Col1a1,Hmox1,Hspa4,Myc,Vegfa,Vim
GO.0014902	myotube differentiation	2	0.0271	ENSRNOP00000008722,ENSRNOP00000024084	Acta1,Cav2
GO.0048546	digestive tract morphogenesis	2	0.0271	ENSRNOP00000003077,ENSRNOP00000026212	Notch1,Pdgfra
GO.0048839	inner ear development	3	0.0271	ENSRNOP00000003077,ENSRNOP00000026212,ENSRNOP00000064356	Bdnf,Notch1,Pdgfra
GO.0060415	muscle tissue morphogenesis	2	0.0271	ENSRNOP00000004956,ENSRNOP00000026212	Col3a1,Notch1
GO.1901385	regulation of voltage-gated calcium channel activity	2	0.0271	ENSRNOP00000017000,ENSRNOP00000063822	Calm1,S100a1
GO.1902692	regulation of neuroblast proliferation	2	0.0271	ENSRNOP00000026212,ENSRNOP00000064356	Bdnf,Notch1
GO.0008544	epidermis development	3	0.028	ENSRNOP00000019267,ENSRNOP00000026212,ENSRNOP00000028793	Igf1r,Notch1,Txnip
GO.0044802	single-organism membrane organization	5	0.0282	ENSRNOP00000006188,ENSRNOP00000008722,ENSRNOP00000014785,ENSRNOP00000026760,ENSRNOP00000040699	Cav2,Itgb1,Myc,Stat3,Stx1a
GO.0006110	regulation of glycolytic process	2	0.0298	ENSRNOP00000006188,ENSRNOP00000026760	Myc,Stat3
GO.0015850	organic hydroxy compound transport	3	0.0298	ENSRNOP00000006188,ENSRNOP00000016942,ENSRNOP00000060874	Myc,Scarb1,Syk
GO.0035924	cellular response to vascular endothelial growth factor stimulus	2	0.0298	ENSRNOP00000003077,ENSRNOP00000026212	Notch1,Pdgfra
GO.0043304	regulation of mast cell degranulation	2	0.0298	ENSRNOP00000016942,ENSRNOP00000019192	Hmox1,Syk
GO.0043392	negative regulation of DNA binding	2	0.0298	ENSRNOP00000019192,ENSRNOP00000023628	Hmox1,Hspa4
GO.0045766	positive regulation of angiogenesis	3	0.0298	ENSRNOP00000019192,ENSRNOP00000023628,ENSRNOP00000026637	Hmox1,Hspa4,Vegfa
GO.0048644	muscle organ morphogenesis	2	0.0298	ENSRNOP00000004956,ENSRNOP00000026212	Col3a1,Notch1
GO.0051893	regulation of focal adhesion assembly	2	0.0298	ENSRNOP00000026637,ENSRNOP00000064368	Apod,Vegfa
GO.0060251	regulation of glial cell proliferation	2	0.0298	ENSRNOP00000024430,ENSRNOP00000026212	Notch1,Vim
GO.0071560	cellular response to transforming growth factor beta stimulus	3	0.0298	ENSRNOP00000004232,ENSRNOP00000004956,ENSRNOP00000005311	Col1a1,Col3a1,Parp1
GO.0007611	learning or memory	4	0.03	ENSRNOP00000005995,ENSRNOP00000012588,ENSRNOP00000063604,ENSRNOP00000064356	Bdnf,Igf1,Kras,Slc17a7
GO.0050865	regulation of cell activation	4	0.03	ENSRNOP00000003077,ENSRNOP00000016942,ENSRNOP00000019192,ENSRNOP00000020528	Ctgf,Hmox1,Pdgfra,Syk
GO.0044249	cellular biosynthetic process	13	0.0309	ENSRNOP00000002837,ENSRNOP00000004232,ENSRNOP00000006188,ENSRNOP00000012137,ENSRNOP00000019403,ENSRNOP00000020528,ENSRNOP00000026212,ENSRNOP00000026760,ENSRNOP00000028793,ENSRNOP00000042230,ENSRNOP00000057733,ENSRNOP00000058593,ENSRNOP00000060874	Ctgf,Hif1a,Hspa8,Myc,Notch1,Parp1,Pparg,Rest,Runx2,Scarb1,Sp1,Stat3,Txnip
GO.0001890	placenta development	3	0.0321	ENSRNOP00000012137,ENSRNOP00000019403,ENSRNOP00000024430	Pparg,Sp1,Vim
GO.0006898	receptor-mediated endocytosis	3	0.0321	ENSRNOP00000011196,ENSRNOP00000040859,ENSRNOP00000060874	Canx,Olr1,Scarb1
GO.0048562	embryonic organ morphogenesis	3	0.0321	ENSRNOP00000003077,ENSRNOP00000019403,ENSRNOP00000026212	Notch1,Pdgfra,Sp1
GO.0044253	positive regulation of multicellular organismal metabolic process	2	0.0328	ENSRNOP00000012137,ENSRNOP00000020528	Ctgf,Pparg
GO.0048708	astrocyte differentiation	2	0.0328	ENSRNOP00000026212,ENSRNOP00000026760	Notch1,Stat3
GO.0043583	ear development	3	0.0332	ENSRNOP00000003077,ENSRNOP00000026212,ENSRNOP00000064356	Bdnf,Notch1,Pdgfra
GO.0032880	regulation of protein localization	6	0.0335	ENSRNOP00000002837,ENSRNOP00000004232,ENSRNOP00000008722,ENSRNOP00000014785,ENSRNOP00000025064,ENSRNOP00000064368	Apod,Cav2,Hspa5,Itgb1,Parp1,Rest
GO.0006139	nucleobase-containing compound metabolic process	12	0.0343	ENSRNOP00000002837,ENSRNOP00000006188,ENSRNOP00000012137,ENSRNOP00000019403,ENSRNOP00000020528,ENSRNOP00000026212,ENSRNOP00000026760,ENSRNOP00000028793,ENSRNOP00000042230,ENSRNOP00000057733,ENSRNOP00000058593,ENSRNOP00000064356	Bdnf,Ctgf,Hif1a,Hspa8,Myc,Notch1,Pparg,Rest,Runx2,Sp1,Stat3,Txnip
GO.0032835	glomerulus development	2	0.0363	ENSRNOP00000003077,ENSRNOP00000026212	Notch1,Pdgfra
GO.0032963	collagen metabolic process	2	0.0363	ENSRNOP00000005311,ENSRNOP00000022679	Col1a1,Mmp2
GO.0010656	negative regulation of muscle cell apoptotic process	2	0.0396	ENSRNOP00000019192,ENSRNOP00000019267	Hmox1,Igf1r
GO.0030239	myofibril assembly	2	0.0396	ENSRNOP00000003077,ENSRNOP00000024084	Acta1,Pdgfra
GO.0032965	regulation of collagen biosynthetic process	2	0.0396	ENSRNOP00000012137,ENSRNOP00000020528	Ctgf,Pparg
GO.0038083	peptidyl-tyrosine autophosphorylation	2	0.0396	ENSRNOP00000016942,ENSRNOP00000019267	Igf1r,Syk
GO.0060079	excitatory postsynaptic potential	2	0.0396	ENSRNOP00000063604,ENSRNOP00000064356	Bdnf,Slc17a7
GO.1900180	regulation of protein localization to nucleus	3	0.0411	ENSRNOP00000004232,ENSRNOP00000008722,ENSRNOP00000064368	Apod,Cav2,Parp1
GO.0050679	positive regulation of epithelial cell proliferation	3	0.0426	ENSRNOP00000006188,ENSRNOP00000026212,ENSRNOP00000026637	Myc,Notch1,Vegfa
GO.0006879	cellular iron ion homeostasis	2	0.0427	ENSRNOP00000006188,ENSRNOP00000019192	Hmox1,Myc
GO.0032101	regulation of response to external stimulus	5	0.0427	ENSRNOP00000003077,ENSRNOP00000012137,ENSRNOP00000016942,ENSRNOP00000026212,ENSRNOP00000064368	Apod,Notch1,Pdgfra,Pparg,Syk
GO.0045124	regulation of bone resorption	2	0.0427	ENSRNOP00000016942,ENSRNOP00000026637	Syk,Vegfa
GO.0051345	positive regulation of hydrolase activity	5	0.0427	ENSRNOP00000002837,ENSRNOP00000006188,ENSRNOP00000012137,ENSRNOP00000020528,ENSRNOP00000025064	Ctgf,Hspa5,Myc,Pparg,Rest
GO.0051782	negative regulation of cell division	2	0.0427	ENSRNOP00000006188,ENSRNOP00000028793	Myc,Txnip
GO.0051091	positive regulation of sequence-specific DNA binding transcription factor activity	3	0.0431	ENSRNOP00000012137,ENSRNOP00000012588,ENSRNOP00000064356	Bdnf,Kras,Pparg
GO.0070542	response to fatty acid	3	0.0431	ENSRNOP00000009233,ENSRNOP00000012137,ENSRNOP00000020528	Ctgf,Insig1,Pparg
GO.1900373	positive regulation of purine nucleotide biosynthetic process	3	0.0431	ENSRNOP00000006188,ENSRNOP00000026760,ENSRNOP00000063822	Calm1,Myc,Stat3
GO.0051248	negative regulation of protein metabolic process	6	0.0441	ENSRNOP00000005995,ENSRNOP00000009179,ENSRNOP00000009402,ENSRNOP00000019267,ENSRNOP00000023628,ENSRNOP00000064368	Apod,Dhcr24,Hspa4,Igf1,Igf1r,Ppia
GO.0048863	stem cell differentiation	3	0.0446	ENSRNOP00000002837,ENSRNOP00000026212,ENSRNOP00000026760	Notch1,Rest,Stat3
GO.0030036	actin cytoskeleton organization	4	0.0447	ENSRNOP00000003077,ENSRNOP00000012588,ENSRNOP00000024084,ENSRNOP00000027773	Acta1,Actn4,Kras,Pdgfra
GO.0001558	regulation of cell growth	4	0.0456	ENSRNOP00000005995,ENSRNOP00000012137,ENSRNOP00000020528,ENSRNOP00000064356	Bdnf,Ctgf,Igf1,Pparg
GO.1903827	regulation of cellular protein localization	4	0.0456	ENSRNOP00000004232,ENSRNOP00000008722,ENSRNOP00000014785,ENSRNOP00000064368	Apod,Cav2,Itgb1,Parp1
GO.0010675	regulation of cellular carbohydrate metabolic process	3	0.0459	ENSRNOP00000005995,ENSRNOP00000006188,ENSRNOP00000026760	Igf1,Myc,Stat3
GO.0006807	nitrogen compound metabolic process	14	0.0462	ENSRNOP00000002837,ENSRNOP00000006188,ENSRNOP00000012137,ENSRNOP00000019192,ENSRNOP00000019403,ENSRNOP00000020528,ENSRNOP00000026212,ENSRNOP00000026637,ENSRNOP00000026760,ENSRNOP00000028793,ENSRNOP00000042230,ENSRNOP00000057733,ENSRNOP00000058593,ENSRNOP00000064356	Bdnf,Ctgf,Hif1a,Hmox1,Hspa8,Myc,Notch1,Pparg,Rest,Runx2,Sp1,Stat3,Txnip,Vegfa
GO.0033365	protein localization to organelle	4	0.0462	ENSRNOP00000005311,ENSRNOP00000025064,ENSRNOP00000026760,ENSRNOP00000028793	Col1a1,Hspa5,Stat3,Txnip
GO.0009617	response to bacterium	5	0.0469	ENSRNOP00000005995,ENSRNOP00000016942,ENSRNOP00000026212,ENSRNOP00000042230,ENSRNOP00000060874	Hif1a,Igf1,Notch1,Scarb1,Syk
GO.0043524	negative regulation of neuron apoptotic process	3	0.0471	ENSRNOP00000012588,ENSRNOP00000019192,ENSRNOP00000064356	Bdnf,Hmox1,Kras
GO.0090101	negative regulation of transmembrane receptor protein serine/threonine kinase signaling pathway	2	0.0498	ENSRNOP00000025064,ENSRNOP00000026212	Hspa5,Notch1
GO.0009743	response to carbohydrate	4	0.05	ENSRNOP00000006188,ENSRNOP00000020528,ENSRNOP00000028793,ENSRNOP00000042230	Ctgf,Hif1a,Myc,Txnip
GO.0043269	regulation of ion transport	6	0.05	ENSRNOP00000002837,ENSRNOP00000005995,ENSRNOP00000006238,ENSRNOP00000016942,ENSRNOP00000017000,ENSRNOP00000063822	Calm1,Igf1,Kcnj16,Rest,S100a1,Syk
All genes targeted by downregulated microRNAs were inputted into Gene Ontology (GO; http://geneontology.org/) database and were clustered in different biological pathways.
